# 1 **The mutagenic forces shaping the genomic landscape of lung cancer in never** 2 **smokers**

3  
4 Marcos Díaz-Gay<sup>1-3,^</sup>, Tongwu Zhang<sup>4,^</sup>, Phuc H. Hoang<sup>4</sup>, Azhar Khandekar<sup>1-4</sup>, Wei Zhao<sup>4</sup>,  
5 Christopher D. Steele<sup>1-3</sup>, Burçak Otlu<sup>1-3,5</sup>, Shuvro P. Nandi<sup>1-3</sup>, Raviteja Vangara<sup>1-3</sup>, Erik N.  
6 Bergstrom<sup>1-3</sup>, Mariya Kazachkova<sup>1-3</sup>, Oriol Pich<sup>6</sup>, Charles Swanton<sup>6,7</sup>, Chao Agnes Hsiung<sup>8</sup>, I-  
7 Shou Chang<sup>9</sup>, Maria Pik Wong<sup>10</sup>, Kin Chung Leung<sup>11</sup>, Jian Sang<sup>4</sup>, John McElderry<sup>4</sup>, Lixing  
8 Yang<sup>12</sup>, Martin A Nowak<sup>13</sup>, Jianxin Shi<sup>4</sup>, Nathaniel Rothman<sup>4</sup>, David C. Wedge<sup>14,15</sup>, Robert  
9 Homer<sup>16</sup>, Soo-Ryum Yang<sup>17</sup>, Qing Lan<sup>4</sup>, Bin Zhu<sup>4</sup>, Stephen J. Chanock<sup>4</sup>, Ludmil B.  
10 Alexandrov<sup>1-3,18,\*</sup>, Maria Teresa Landi<sup>4,\*</sup>

11  
12 <sup>1</sup>Department of Cellular and Molecular Medicine, University of California San Diego, La Jolla,  
13 CA, USA

14 <sup>2</sup>Department of Bioengineering, University of California San Diego, La Jolla, CA, USA,

15 <sup>3</sup>Moores Cancer Center, University of California San Diego, La Jolla, CA, USA

16 <sup>4</sup>Division of Cancer Epidemiology and Genetics, National Cancer Institute, Bethesda, MD, USA

17 <sup>5</sup>Department of Health Informatics, Graduate School of Informatics, Middle East Technical  
18 University, Ankara, Turkey

19 <sup>6</sup>Cancer Evolution and Genome Instability Laboratory, The Francis Crick Institute, London, UK

20 <sup>7</sup>Cancer Research UK Lung Cancer Centre of Excellence, University College London Cancer  
21 Institute, London, UK

22 <sup>8</sup>Institute of Population Health Sciences, National Health Research Institutes, Zhunan, Taiwan

23 <sup>9</sup>National Institute of Cancer Research, National Health Research Institutes, Zhunan, Taiwan

24 <sup>10</sup>Queen Mary Hospital, The University of Hong Kong, Hong Kong, China

25 <sup>11</sup>Department of Pathology, The University of Hong Kong, Hong Kong, China

26 <sup>12</sup>Ben May Department for Cancer Research, Department of Human Genetics, Comprehensive  
27 Cancer Center, The University of Chicago, Chicago, IL, USA

28 <sup>13</sup>Department of Mathematics, Harvard University, Cambridge, MA, USA

29 <sup>14</sup>Manchester Cancer Research Centre, The University of Manchester, Manchester, UK

30 <sup>15</sup>Manchester NIHR Biomedical Research Centre, Manchester, UK

31 <sup>16</sup>Yale Surgery Pathology Department, Yale University, New Haven, CT, USA

32 <sup>17</sup>Department of Pathology and Laboratory Medicine, Memorial Sloan Kettering Cancer Center,  
33 New York, USA

34 <sup>18</sup>Sanford Stem Cell Institute, University of California San Diego, La Jolla, CA, USA

35  
36 <sup>^</sup>These authors contributed equally

37 <sup>\*</sup>Correspondence should be addressed to [L2alexandrov@health.ucsd.edu](mailto:L2alexandrov@health.ucsd.edu) and

38 [landim@mail.nih.gov](mailto:landim@mail.nih.gov)

39

40 **ABSTRACT**

41 Lung cancer in never smokers (LCINS) accounts for up to 25% of all lung cancers and has been  
42 associated with exposure to secondhand tobacco smoke and air pollution in observational studies.  
43 Here, we evaluate the mutagenic exposures in LCINS by examining deep whole-genome  
44 sequencing data from a large international cohort of 871 treatment-naïve LCINS recruited from 28  
45 geographical locations within the Sherlock-*Lung* study. *KRAS* mutations were 3.8-fold more  
46 common in adenocarcinomas of never smokers from North America and Europe, while a 1.6-fold  
47 higher prevalence of *EGFR* and *TP53* mutations was observed in adenocarcinomas from East Asia.  
48 Signature SBS40a, with unknown cause, was found in most samples and accounted for the largest  
49 proportion of single base substitutions in adenocarcinomas, being enriched in *EGFR*-mutated  
50 cases. Conversely, the aristolochic acid signature SBS22a was almost exclusively observed in  
51 patients from Taipei. Even though LCINS exposed to secondhand smoke had an 8.3% higher  
52 mutational burden and 5.4% shorter telomeres, passive smoking was not associated with driver  
53 mutations in cancer driver genes or the activities of individual mutational signatures. In contrast,  
54 patients from regions with high levels of air pollution were more likely to have *TP53* mutations  
55 while exhibiting shorter telomeres and an increase in most types of somatic mutations, including  
56 a 3.9-fold elevation of signature SBS4 (q-value= $3.1 \times 10^{-5}$ ), previously linked mainly to tobacco  
57 smoking, and a 76% increase of clock-like signature SBS5 (q-value= $5.0 \times 10^{-5}$ ). A positive dose-  
58 response effect was observed with air pollution levels, which correlated with both a decrease in  
59 telomere length and an elevation in somatic mutations, notably attributed to signatures SBS4 and  
60 SBS5. Our results elucidate the diversity of mutational processes shaping the genomic landscape  
61 of lung cancer in never smokers.

62

## 63 INTRODUCTION

64 While cancers of the lungs are commonly associated with tobacco smoking<sup>1</sup>, prior studies have  
65 indicated that between 10 and 25% of the 2.2 million lung cancer cases worldwide are found within  
66 individuals that have never smoked tobacco cigarettes<sup>2,3</sup>. The prevalence of lung cancer in never  
67 smokers (LCINS) varies by several notable factors, namely enrichment in females<sup>4</sup>, Asian  
68 populations<sup>5</sup>, and individuals with a family history of lung cancer<sup>6</sup>. The occurrence of LCINS can  
69 also differ by geographic regions, with higher rates reported in East Asia<sup>7,8</sup> and Eastern Europe<sup>9</sup>  
70 when compared to countries in North America and Western Europe<sup>10</sup>. Epidemiological studies  
71 have also identified environmental exposures that can increase LCINS risk, including exposure to  
72 secondhand smoke<sup>11</sup> and air pollution<sup>12,13</sup>.

73

74 Elucidating the mutational signatures operative within a cancer genome allows the understanding  
75 of mutational processes implicated in cancer development<sup>14</sup>. Prior analyses have revealed more  
76 than 100 characteristic signatures across the spectrum of human neoplasia, with putative etiology  
77 assigned to approximately one third of known signatures<sup>15</sup>. However, there has been no  
78 comprehensive examination of the mutational signatures operative in LCINS as prior lung cancer  
79 whole-genome sequencing studies have focused almost exclusively on tobacco smokers from  
80 European descent<sup>16,17</sup> and they have included only a relative small number of LCINS, mostly from  
81 East Asian descent<sup>18</sup>. To the best of our knowledge, our prior whole-genome sequencing study  
82 encompassing 232 lung cancers from never-smokers<sup>19</sup>, which was focused on evolutionary  
83 classification and its potential for personalized treatment, has been the largest examination of the  
84 mutational landscape in LCINS.

85

86 To understand the mutational processes shaping the lung cancer genomes of never smokers, here,  
87 we generated and analyzed deep whole-genome sequencing data from 871 treatment-naïve LCINS,  
88 including lung cancer histologies both commonly and rarely found in never-smokers. Our large  
89 international cohort of LCINS allowed a comprehensive evaluation of the mutagenic role of  
90 secondhand smoke, as well as the examination and comparison of mutational signatures between  
91 biological sexes, ancestries, and 28 geographic regions with different levels of air pollution.



## 92 RESULTS

### 93 The Sherlock-Lung never-smoking lung cancer cohort

94 As part of the Sherlock-Lung study<sup>20</sup>, a total of 871 treatment-naïve never-smoking lung cancer  
95 cases were whole-genome sequenced with a mean coverage of 88x and 35x for tumor and matched  
96 germline samples, respectively. Patients were recruited from 28 different locations across four  
97 continents (**Fig. 1a**) and were predominantly female ( $n=688$ ; 79.0%). Patients from North America  
98 and Europe (NA/EU;  $n=541$ ; 62.1%) mostly clustered with the EUR super-sample from the 1,000  
99 Genomes Project<sup>21</sup> (472/541; 87.2%), and patients from East Asia (AS;  $n=309$ ; 35.5%) clustered  
100 exclusively with the EAS super-sample (**Fig. 1b**). Patients of European descent were almost  
101 exclusively recruited from Europe, Russia, USA, and Canada, while patients from Asian descent  
102 were recruited mainly in Hong Kong, Taipei, Korea, and Canada (**Supplementary Table 1**). Most  
103 patients were diagnosed with adenocarcinomas ( $n=737$ ; 84.6%) or carcinoid tumors ( $n=61$ ; 7.0%).  
104 In addition, we report the genomic landscapes of 31 squamous cell carcinomas and additional rarer  
105 histologies, including 13 adenosquamous carcinomas, 5 large cell carcinomas and 24 tumors with  
106 uncertain histological subtype (**Supplementary Table 1**). Information on passive smoking was  
107 collected for 458 patients, with 250 exposed and 208 not exposed to secondhand tobacco smoke.  
108 No subjects included in the study reported occupational exposure to mutagenic agents.

109

### 110 Mutational patterns of lung cancer in never smokers

111 The median tumor mutational burden (TMB) was 5,068 for single base substitutions (SBSs; range  
112 393-151,385), 279 for small insertions and deletions (IDs; range 14-10,474), and 105 for structural  
113 variants (SV; range 1-1,103 **Fig. 1c**), with differences across histologies and geographical  
114 locations. Similarly, the median percentage of genome aberration was 55.3%, with clear variances

115 across histologies and geographical areas (**Fig. 1c**). To identify the mutational processes operative  
116 in LCINS, we performed *de novo* extraction<sup>22</sup> of mutational signatures for SBS, ID, doublet base  
117 substitutions (DBS), copy number (CN) alterations, and structural variants (SV; **Supplementary**  
118 **Tables 2-6**). Eleven *de novo* SBS signatures were extracted and further decomposed into 18  
119 previously identified signatures from the Catalogue of Somatic Mutations in Cancer  
120 (COSMICv3.4) reference signature database<sup>23</sup> (**Supplementary Fig. 1; Supplementary Table 7**).  
121 The unprecedented size of the cohort allowed us to refine the prevalence and intensity of the  
122 signatures involved in LCINS, with several signatures identified for the first time in LCINS,  
123 including signature SBS40a, recently extracted in clear cell renal cell carcinomas but shown to be  
124 active in multiple cancer types<sup>15,24</sup>. Other SBS signatures not previously seen in LCINS included  
125 unknown etiology signatures SBS12, SBS33, and SBS39 as well as the aristolochic acid-related  
126 signature SBS22a and tobacco smoking-associated signatures SBS4 and SBS92 (**Fig. 1d**).  
127 Additionally, the mismatch repair deficiency-associated signatures SBS21 and SBS44 were  
128 detected in one lung adenocarcinoma case, which had 10,474 indels and was confirmed by  
129 MMRDetect<sup>25</sup> as microsatellite unstable cancer. Analysis of indels and doublet base substitutions  
130 revealed a new compendium of mutational signatures operative in LCINS (**Supplementary Figs.**  
131 **2-3; Supplementary Tables 8-9**). Specifically, a novel ID signature was identified (termed, ID24),  
132 characterized by short microhomology deletions, whereas several ID and DBS signatures were  
133 identified for the first time in LCINS, including ID6, ID10, ID11, ID14, ID19, ID23, DBS5, DBS6,  
134 and DBS13. *De novo* extraction of signatures of large mutational events revealed four CN  
135 (**Supplementary Fig. 4**) and four SV (**Supplementary Fig. 5**) signatures, which were  
136 subsequently decomposed into the recently described COSMICv3.4 reference signatures<sup>26-29</sup>  
137 (**Supplementary Tables 10-11**).

## 138 **Mutational landscape of lung adenocarcinoma in never smokers**

139 The genomic landscape of the 737 lung adenocarcinomas from never smokers showed a  
140 remarkable heterogeneity for both SBS and CN alterations (**Fig. 2a**). Approximately 4.9% of  
141 adenocarcinomas (36/737) harbored tobacco-associated signature SBS4, while the most prevalent  
142 signature was SBS40a, of unknown etiology, which contributed 28.2% of all substitutions.  
143 Interestingly, a cluster of 25 hypermutated samples (>25,000 mutations) with high proportions of  
144 SBS4 and APOBEC-associated signatures SBS2 and SBS13 was identified (**Fig. 2a-b**).  
145 Additionally, a smaller subset of 11 cases harboring signatures SBS3 and ID6, both linked to  
146 homologous recombination deficiency (HRD), was also identified. The presence of HRD was  
147 further evaluated using CHORD<sup>30</sup> and HRDetect<sup>31</sup>, which jointly predicted six of the cases as  
148 HRD, with two additional cases predicted as HRD exclusively by CHORD (**Supplementary Fig.**  
149 **6**).

150

151 Comparisons between patients from different regions revealed differences in somatic mutagenesis  
152 (**Fig. 2c-d**). Notably, signature SBS22a (previously known as SBS22, and recently renamed<sup>24</sup>) was  
153 enriched in patients from East Asia (**Fig. 2c**). This enrichment was also observed after removing  
154 the patients from Canada with EAS ancestry (**Supplementary Fig. 7; Methods**), which  
155 encompassed most of the patients with EAS ancestry not residing in Asia (35/40, 87.5%; **Fig. 1b**).  
156 Further, SBS22a was found almost exclusively in patients from Taipei (32/36 SBS22a-positive  
157 cases, 88.9%). Although SBS22a has been associated with aristolochic acid exposure in liver,  
158 bladder, and kidney cancers<sup>32,33</sup>, this is the first evidence of aristolochic acid causing mutations in  
159 lung cancer. Moreover, SBS22a also showed a significant co-occurrence with SBS12 in patients  
160 from East Asia (OR=4.55; p-value= $1.2 \times 10^{-4}$ ). SBS12 is commonly found in gastrointestinal

161 cancers, especially cancers of the livers<sup>15,34</sup> and kidneys<sup>24</sup>, with a consistent enrichment of the  
162 signature in patients from East Asia<sup>24,34</sup>.

163  
164 Several signatures of indels and large genomics alterations differed across regions (**Extended**  
165 **Data Fig. 1a**), with ID3, CN20, SV2, SV4, SV6, and SV9 being more prevalent in patients from  
166 East Asia, whereas three additional SV signatures, all linked primarily with non-clustered  
167 alterations, SV5, SV7, and SV10, were enriched in North American and European patients.  
168 Interestingly, CN20 was previously found elevated in Black TCGA patients but not in Asian  
169 patients when compared to White patients<sup>26</sup>. Additionally, signatures SBS4 and ID3 showed a  
170 difference between males and females across the spectrum of variant classes, with a notably higher  
171 prevalence in males, whereas ID9 was enriched in females (**Extended Data Fig. 1b**).

172  
173 As in prior LCINS studies<sup>10</sup>, *EGFR* and *TP53* harbored the most driver mutations, with 52.2% and  
174 30.5% mutated in adenocarcinomas, respectively, whereas *KRAS* was only mutated in 6.5% of  
175 samples. *EGFR* and *TP53* mutations were enriched in patients from East Asia, as previously  
176 reported<sup>35</sup>, and *KRAS* mutations were elevated in North American and European patients (**Fig. 2e-**  
177 **f** and **Extended Data Fig. 1c-e**). No differences were found for driver mutations between males  
178 and females for adenocarcinomas (**Extended Data Fig. 1f**). Interestingly, for *EGFR*-mutated  
179 tumors, a significant increase in TMB was observed for those *TP53*-wild-type (q-  
180 value= $1.2 \times 10^{-4}$ ), whereas a decrease was found for *TP53*-mutated cases (q-value=0.15;  
181 **Extended Data Fig. 1g**). In addition, while analyzing *EGFR*-mutated cases specifically, we  
182 identified a high enrichment in the prevalence of signature SBS40a, along with other signatures of  
183 multiple variant types (**Extended Data Fig. 1h**).

184 Most driver mutations in *EGFR*, *TP53*, and *KRAS* were probabilistically assigned to signatures  
185 SBS5 and SBS40a (**Fig. 2g**), with the proportion of driver mutations significantly higher than  
186 expected according to their prevalence in the overall adenocarcinoma cohort (OR=2.55; p-  
187 value= $9.8 \times 10^{-22}$ ; **Fig. 2d**). Prior analyses have shown that SBS4 generates the majority of driver  
188 mutations in *KRAS* in tobacco smokers<sup>36</sup>. In our samples, SBS4 contributed only ~10% of *KRAS*  
189 mutations. Most driver indels, especially in *EGFR* (mostly exon 19 deletions; 150/173, 86.7%),  
190 were probabilistically assigned to signature ID8 (**Fig. 2h**), which has been previously related to  
191 radiation exposure<sup>37</sup>. Despite contributing a significant number of mutations in adenocarcinomas  
192 (**Fig. 2d**), APOBEC-associated signatures SBS2 and SBS13 generate a significantly lower number  
193 of driver mutations in *EGFR*, *TP53*, and *KRAS* (OR=0.28; p-value= $2.8 \times 10^{-14}$ ) in comparison to  
194 their prevalence in the overall adenocarcinoma cohort, with most APOBEC-associated mutations  
195 being *TP53* point mutations in a small number of samples (**Fig. 2g**).

196

### 197 **Mutational landscape of lung carcinoids in never smokers**

198 Carcinoid tumors were the second most common histology, with all samples originating from  
199 North American and European patients except one case from Taipei (**Supplementary Table 1**),  
200 and only one case harboring signature SBS4. Carcinoids presented a lower number of single base  
201 substitutions (p-value= $3.3 \times 10^{-29}$ ), copy number (p-value= $2.6 \times 10^{-32}$ ), and structural variants (p-  
202 value= $4.2 \times 10^{-26}$ ) compared to adenocarcinomas, as well as longer telomeres (p-value= $2.0 \times 10^{-6}$ ;  
203 **Extended Data Fig. 2**). SBS5 accounted for 55.7% of all mutations in carcinoids in contrast to  
204 27.0% in the adenocarcinomas (p-value $<2.2 \times 10^{-16}$ ; **Fig. 1d** and **Extended Data Fig. 3a**). In  
205 comparison to adenocarcinomas, carcinoids showed 3.39-fold lower TMB (**Extended Data Fig.**  
206 **2a**), with depletion of signatures SBS2, SBS5, SBS12, and SBS13 (**Extended Data Fig. 4a**).

207 Nevertheless, we observed an enrichment in signature SBS8, previously linked to nucleotide  
208 excision repair<sup>38</sup> and late replicating regions<sup>39</sup>. Interestingly, SBS8 was a relatively minor  
209 signature in adenocarcinomas (**Fig. 1d**) but present in the majority of carcinoids (35/61), where it  
210 contributed 11.0% of all mutations (**Extended Data Fig. 3a**). As lung carcinoids are thought to  
211 originate from neuroendocrine cells producing hormones and hormone-like substances<sup>40</sup>, the  
212 presence of SBS8 is perhaps not surprising as this mutational signature is commonly observed in  
213 hormone-dependent cancers such as breast<sup>41</sup> and prostate<sup>15</sup> adenocarcinomas.

214  
215 Additionally, three ID signatures and the diploid CN1 signature were found enriched in carcinoids,  
216 whereas several different signatures were enriched in adenocarcinomas, including two DBS, four  
217 ID, and most CN and SV signatures (**Extended Data Fig. 3b** and **4a**), as expected due to the lower  
218 number of large genomic aberrations of this histological subtype of LCINS (**Extended Data Fig.**  
219 **2a**). No *EGFR* or *KRAS* driver mutations were found in carcinoid histology, whereas an  
220 enrichment was found for driver mutations in *ARID1A* (**Extended Data Fig. 3c** and **4b-d**).

221  
222 **Mutational landscape of lung squamous cell carcinomas in never smokers**  
223 Squamous cell carcinomas accounted for 3.6% of LCINS (31/871), with 13 samples harboring  
224 tobacco-associated signature SBS4. In comparison with adenocarcinomas, squamous cell  
225 carcinomas showed an elevated burden of SBS, DBS, and ID, in contrast to a similar landscape of  
226 large genomic alterations and telomere lengths (**Extended Data Fig. 2**). Several signatures showed  
227 higher prevalence compared to adenocarcinomas, including SBS3, SBS4, SBS92, and SV7  
228 (**Extended Data Fig. 5a-c** and **6a**). *TP53* was the most prevalent driver mutation (58.1% of cases;  
229 **Extended Data Fig. 5d**) and was found enriched in LCINS squamous cell carcinomas compared

230 to adenocarcinomas, along with mutations in *LRP1B*, *PIK3CA*, and *PTEN* (**Extended Data Fig.**  
231 **6b-g**). In contrast, *EGFR* mutations were rarely observed in squamous cell carcinomas, as  
232 previously reported<sup>42</sup> (**Extended Data Fig. 6d**).

233

#### 234 **SBS4 in lung tumors from never smokers**

235 Tobacco-associated signature SBS4 was found active in 56 LCINS tumors (6.4%), and was the  
236 predominant signature in 39 of them (69.6%) and in many hypermutated cases (5.51-fold higher  
237 median SBS burden in SBS4+ cases; **Extended Data Fig. 7a-b**). Similarly, signature SBS92,  
238 recently linked to tobacco smoking in bladder<sup>22,43</sup> and other cancer types<sup>44</sup>, was also active in four  
239 SBS4+ tumors, and found significantly enriched in SBS4+ cases ( $p\text{-value}=2.1 \times 10^{-4}$ ; **Extended**  
240 **Data Fig. 7b**). Tumors presenting active SBS4 also showed a significant enrichment of previous  
241 ID and DBS signatures linked to tobacco smoking, namely ID3 ( $p\text{-value}=1.1 \times 10^{-22}$ ) and DBS2  
242 ( $p\text{-value}=5.0 \times 10^{-7}$ ; **Extended Data Fig. 7c-d**). Additionally, SBS4 in LCINS exhibited the same  
243 genome topography characteristics as SBS4 in smokers<sup>45</sup>, including enrichment in late replicating  
244 regions, periodicity in the vicinity of nucleosomes, and strong genic and transcriptional strand  
245 asymmetries (**Extended Data Fig. 8**).

246

247 In principle, detecting SBS4 in never-smokers can be due to misannotation of tobacco smoking  
248 status. The observed SBS4 prevalence increase in males and lung squamous cell carcinomas  
249 indicates that some samples might have been incorrectly annotated as never smokers.  
250 Nevertheless, the 56 LCINS tumors with SBS4 exhibited statistically different driver mutations  
251 when compared to previously generated lung cancers from tobacco smokers<sup>36</sup> (**Extended Data**  
252 **Fig. 7e**). Specifically, the LCINS samples had fewer mutations in *KRAS* (OR=0.41; p-

253 value=0.021) and an enrichment of *EGFR* p.L858R hotspot mutations (OR=29.35; p-  
254 value= $4.1 \times 10^{-4}$ ). These differences indicate that, in addition to possible misannotation, other  
255 exogenous processes may be generating SBS4 in these never smokers. As prior work has shown  
256 that SBS4 can be found in lifelong non-smokers exposed to different environmental mutagens,  
257 including occupational history of coal tar work<sup>46</sup> and indoor air pollution<sup>47</sup>, we evaluated whether  
258 SBS4 in this cohort, as well as mutations in other samples, can be generated by either secondhand  
259 exposure to tobacco smoking or by high levels of air pollution.

260

### 261 **Passive smoking has low mutagenicity in LCINS**

262 To understand the mutational processes activated by secondhand tobacco smoking, we compared  
263 the genomic landscapes of 250 LCINS from passive smokers to 208 LCINS from individuals who  
264 were not exposed to secondhand smoke. We observed an increase of SBS mutations in passive  
265 smokers (**Fig. 3a**), as well as a decrease in tumor/normal telomere length ratio (**Fig. 3b**). Although  
266 not significant, the directionality of these associations with passive smoking was consistent after  
267 adjustment for other covariates, encompassing age, sex, genetic ancestry, histology, and tumor  
268 purity – 8.3% increase and 5.4% decrease in the magnitude of regression coefficients after  
269 covariate correction, respectively (**Fig. 3c-d**). Almost identical results were observed when we  
270 restricted the analyses to the lung adenocarcinomas from never smokers (**Supplementary Fig. 8**),  
271 and when the principal components from the ancestry analysis were used instead of the ancestry  
272 labels for adjustment (**Supplementary Table 12; Methods**). However, this increase in mutation  
273 burden was not specifically associated with any mutational signature (**Fig. 3e**) or mutation type  
274 (**Fig. 3f**). In addition, no significant differences were found for mutations in any cancer driver  
275 genes (**Fig. 3g**), nor for the burden of ID, DBS, SV, or CN segments (**Extended Data Fig. 9a-e**)



276 or the presence of signatures derived from these mutation types (**Extended Data Fig. 9f**). Amongst  
277 the 250 cases identified as exposed to secondhand smoke, only three (1.2%) displayed signature  
278 SBS4 (OR=0.62; p-value=0.71), each with a contribution exceeding 20% and at least 500  
279 mutations attributed to SBS4. Moreover, only two of the 281 driver mutations found in secondhand  
280 smoke-exposed samples were assigned to SBS4 with a probability above 50%, including a *TP53*  
281 missense mutation (p.Val157Phe) and a missense mutation (p.Val409Leu) in *NFI*.

282

283 To evaluate if we were unable to assign SBS4 to other secondhand smoke-exposed cases due to  
284 low levels of the signature, we synthetically injected SBS4 mutations using simulations at different  
285 levels into the mutational profiles of the 247 passive smoker cases that lacked SBS4 and assessed  
286 the number of samples where SBS4 was detected (**Supplementary Fig. 9**). We were able to detect  
287 SBS4 in around a quarter of simulated samples, if it contributed at least 5% of all mutations within  
288 a sample. Moreover, SBS4 was detectable in almost every sample when the signature accounted  
289 for more than 10% of mutations. These simulation results agree with the levels of SBS4 observed  
290 in the set of SBS4+ samples, where SBS4 is contributing above 10%. Thus, although SBS4 could  
291 have been missed in some secondhand smoke exposed LCINS, this signature would be likely  
292 contributing less than 5% of mutations in these cancers. Overall, our simulations demonstrate that  
293 it is unlikely that exposure to secondhand smoke accounts for SBS4, whereas the modest increase  
294 in overall SBS mutations suggests that passive smoking has low mutagenicity.

295

## 296 **Air pollution is associated with increased somatic mutations in LCINS**

297 Given the recent evidence of the role of air pollution in lung carcinogenesis<sup>12,48</sup>, we assessed  
298 whether atmospheric air pollution, quantified by the environmental particulate matter measuring

299  $\leq 2.5 \mu\text{m}$  ( $\text{PM}_{2.5}$ ), had an effect on the accumulation of somatic mutations in LCINS. Yearly  $\text{PM}_{2.5}$   
300 estimates from 1998–2021 were obtained for the 853 LCINS cases with annotated country of  
301 residence using a hybrid model combining satellite-based measurements of aerosol optical depth  
302 with chemical transport modeling and ground-based observations (**Methods**)<sup>49</sup>. Considering the  
303 distribution of  $\text{PM}_{2.5}$  estimates across the cohort, a threshold of  $20 \mu\text{g}/\text{m}^3$  was used to separate  
304 patients diagnosed in regions with high and low levels of pollution (**Supplementary Fig. 10**).  
305 LCINS originating from areas with high  $\text{PM}_{2.5}$  levels exhibited increased burdens of SBS (13.0%),  
306 DBS (8.3%), and ID mutations (7.6%; **Fig. 4a**), along with telomere shortening (**Fig. 4b**), even  
307 after accounting for age, sex, genetic ancestry, histology, and tumor purity (**Fig. 4c-d**;  
308 **Supplementary Table 12**). No enrichments were identified for the numbers of SV or CN segments  
309 after corrections (**Extended Data Fig. 10a-b**). In order to determine whether higher levels of  
310 pollution lead to an increase in somatic mutagenesis (*i.e.*, a dose-response effect), we calculated  
311 individual estimates of  $\text{PM}_{2.5}$  per lung cancer patient (**Methods**). Consistent with a dose-response  
312 effect, we found statistically significant positive correlations of  $\text{PM}_{2.5}$  with the burden of SBS,  
313 DBS, and ID (**Fig. 4e-g**), as well as a negative correlation with telomere length (**Fig. 4h**), further  
314 corroborating the dose-response relationship of outdoor air pollution and somatic mutations in  
315 LCINS.

316  
317 Several mutational signature-specific associations with individual  $\text{PM}_{2.5}$  estimates were found  
318 after adjusting for covariates (**Fig. 5a**). These included clock-like signature SBS5 (OR for  $10 \mu\text{g}/\text{m}^3$   
319 of  $\text{PM}_{2.5}$ =1.76; q-value= $5.0 \times 10^{-5}$ ) as well as signatures SBS4 (OR=3.86; q-value= $3.1 \times 10^{-5}$ ) and  
320 ID3 (OR=1.63; q-value= $5.1 \times 10^{-4}$ ; **Fig. 5b**; **Supplementary Table 12**). Furthermore, dose-  
321 response effects were also observed for these signatures, with a significant positive correlation

322 between the total numbers of mutations assigned to a given signature and the individual PM<sub>2.5</sub>  
323 estimates (**Fig. 5c-e**). Specifically, a unit (1µg/m<sup>3</sup>) increase of PM<sub>2.5</sub> was associated with a 2.3%  
324 increase in SBS5-associated mutations, 12.0% in SBS4-associated mutations, and 6.0% in ID3-  
325 associated mutations, independent of other covariates. No associations were found with DBS, CN,  
326 or SV signatures (**Fig. 5a; Extended Data Fig. 10c**). Patients in regions with high PM<sub>2.5</sub> exposure  
327 were 1.6 times more likely to have *TP53* mutations and 2.5 times less likely to have *CTNNB1*  
328 mutations (**Fig. 5f-h**). Overall, these results indicate that elevated air pollution levels are associated  
329 with an increase in both somatic mutations contributing to specific mutational signatures as well  
330 as an increased prevalence of *TP53* mutations.

331

## 332 DISCUSSION

333 This study presents the most extensive mutational analyses of whole-genome sequenced lung  
334 cancers in never smokers. Our results reveal multiple mutational signatures and mutated cancer  
335 driver genes whose frequencies differ across lung cancer histologies, regions, and exposures.  
336 Particularly noteworthy is our finding of the aristolochic acid signature SBS22a in patients from  
337 Taipei, possibly shedding light on one of the previous unappreciated environmental factors  
338 contributing to the accumulation of mutations in LCINS from East Asia. Similarly, multiple  
339 signatures of indels and large genomics alterations, most with unknown etiology, were found to  
340 differ across regions, further highlighting the likely existence of additional population-specific  
341 exposures and other factors contributing to LCINS. Notably, SBS40a, with an unknown cause, and  
342 previously associated with kidney cancer<sup>24</sup>, accounted for the largest proportion of substitutions in  
343 adenocarcinomas, thus indicating the existence of a globally widespread and previously  
344 unappreciated mutagenic process, likely of endogenous origin.

345  
346 Prior epidemiological research<sup>11</sup> has established that passive smoking can be associated with a  
347 modest heightened risk for developing LCINS. In line with the observational research, our analysis  
348 of 458 patients with known exposure to passive smoking uncovered only minimal indications of  
349 elevated mutagenesis amongst individuals exposed to secondhand smoke. As in previous  
350 epidemiological studies, the data about second-hand tobacco smoking exposure was derived from  
351 questionnaires and clinical datasets, and varied across individuals, going from very detailed  
352 (during childhood, at work, or with a smoking spouse) to just binary yes/no exposure status. Thus,  
353 low exposure levels or very remote exposure (during childhood) may contribute to our findings of  
354 low mutagenicity. Nevertheless, our results are also consistent with a recent study in 291 Japanese

355 LCINS patients with extensive information on passive smoking<sup>50</sup>. Additional non-mutagenic  
356 carcinogenesis could be contributing to the observed rise in lung cancer in those exposed to  
357 secondhand smoke.

358  
359 Our investigation of the mutagenic role of outdoor air pollution relied on an average country- and  
360 state/province-level quantification of PM<sub>2.5</sub> that did not provide granularity within these  
361 geographical regions or consideration for seasonal variabilities or indoor air pollution levels. The  
362 exposure was linked to the subjects' residence at the time of lung cancer diagnosis and may not  
363 reflect their lifetime exposure, and the assigned exposures for the patients recruited to this study  
364 may systematically differ from the average country, state, province, or city level pollution levels.  
365 As such, these associations should be interpreted with caution. Despite these limitations, our  
366 findings suggest that LCINS in individuals from areas with elevated air pollution have a higher  
367 prevalence of *TP53* mutations while exhibiting shorter telomeres and heightened mutagenesis,  
368 notably attributed to signatures SBS4 and SBS5. Consistent with our findings, a previous study  
369 comparing Chinese regions with different levels of air pollution reported an increase in *TP53* and  
370 total somatic mutations in the highly polluted region of Xuanwei, with a C>A enriched mutational  
371 pattern resembling signature SBS4<sup>51</sup>.

372  
373 In principle, mutations linked to clock-like signature SBS5 that accumulate in LCINS with the  
374 increase of PM<sub>2.5</sub> could be due to additional DNA damage that accumulates in people living in  
375 more polluted areas. In addition, considering the significant telomere shortening observed with  
376 high levels of PM<sub>2.5</sub> exposure, the clock-like somatic mutations could also be a readout of a  
377 promotion mechanism where lung cells are undergoing more cell divisions in individuals residing

378 in highly polluted areas. Consistently, a recent experimental study<sup>48</sup> showed that air pollution acts  
379 as a tumor-promoting inflammatory agent, demonstrating that short-term exposure to PM<sub>2.5</sub> is not  
380 strongly mutagenic in mice, although leading to an elevation of signature SBS5 and reduced  
381 telomeres (**Extended Data Fig. 11**). Future studies with long-term PM<sub>2.5</sub> exposures and higher  
382 number of replicates will be required to experimentally validate the role of outdoor air pollution  
383 as a driver of both mutations and inflammation leading to tumorigenesis.

384

385 While the association between SBS4 and PM<sub>2.5</sub> potentially encompasses the effects of atmospheric  
386 pollution exposure in LCINS, the small proportion of cases affected by SBS4 (6.4% of all samples)  
387 and the high number of mutations in SBS4+ cancers (21,785 on average) could indicate extreme  
388 events of outdoor, indoor, or occupational air pollution. Indeed, such events have been previously  
389 reported, for example, SBS4 was found in the lung cancers of never-smoking Chinese women that  
390 often cook with smoky coal in poorly ventilated houses<sup>47</sup>, and it is likely that severe levels of  
391 pollution are more common in countries with overall higher air pollution levels. Lastly, it is also  
392 possible that the self-reported smoking status was inaccurate, as previously shown in other cohorts  
393 after biochemical verification<sup>52</sup>, and that some SBS4 cases from smokers were misannotated as  
394 never smokers, albeit it is unlikely that such misannotation will exhibit any correlation with air  
395 pollution. Notwithstanding, the reported associations between air pollution and somatic mutations  
396 remained unaffected when all SBS4 mutations were excluded from our analysis (**Extended Data**  
397 **Fig. 12**).

398

399 Overall, the unprecedented size of our global cohort allowed us to refine the prevalence and  
400 intensity of the mutational signatures and driver mutations involved in LCINS, and their variability

401 across histologies, genetic ancestries, and geographical locations. Although LCINS appear to be  
402 dominated by endogenous processes, our results indicate exposure to aristolochic acids in Taipei's  
403 samples, a low mutagenicity of passive smoking, and a role of air pollution as both a mutagenic  
404 initiator and promoter of neoplastic expansion in LCINS.  
405

406 **FIGURE LEGENDS**

407 **Fig. 1. Overview of the Sherlock-Lung cohort of lung cancers in never smokers. a,**

408 Geographical distribution of the 871 patients across four continents and 28 geographic locations.

409 **b,** Clinical characterization based on histology, genetic ancestry, geographical region, biological

410 sex, and passive smoking status. **c,** Prevalence of mutations, percentage of genome altered, and

411 structural variants across geographic locations and stratified based on histology. Left panel, dots

412 represent median values for the three genomic alterations individually per country and histology.

413 Right panel, dots represent individual tumors, colors different histology types, and horizontal

414 purple lines median values across all histologies. **d,** Landscape of mutational signatures across

415 histologies and somatic variant classes, including single base substitutions (SBS), doublet base

416 substitutions (DBS), small insertions and deletions (ID), copy number alterations (CN), and

417 structural variants (SV). The size and color of the dots represent the percentage of mutations

418 contributed by the signature in all samples sharing the same histology (top panel) or the percentage

419 of samples of a histological type where a particular signature is active (bottom panel). AS: East

420 Asian geographical regions, EAS: East Asian genetic ancestry super-sample, EUR: European

421 genetic ancestry super-sample, LUAD: lung adenocarcinomas, LUSC: lung squamous cell

422 carcinomas, NA/EU: North America and Europe geographical regions.

423

424 **Fig. 2 Repertoire of mutational signatures and driver mutations in LCINS adenocarcinomas.**

425 **a,** Distribution of the most prevalent signatures per sample according to the number of single base

426 substitutions (SBS) and percentage of genome aberrated. **b,** Activity of SBS mutational signatures

427 across samples, representing the total number of mutations attributed to each signature in a given

428 sample. Dots represent individual samples and purple horizontal bars median values. The numbers



429 on the bottom indicate the total number of samples where a particular signature was found active  
430 (blue) and the total number of LCINS adenocarcinoma samples (green). **c**, Regional differences  
431 across signatures. Volcano plot indicating enrichment of SBS signatures in patients from East  
432 Asian (AS) and North American/European regions (NA/EU) in LCINS adenocarcinomas (top  
433 panel) and bar plot indicating prevalence by geographical region (bottom panel). Horizontal lines  
434 marking statistically significant thresholds were included at 0.05 (dashed orange line) and 0.01  
435 FDR levels (dashed red line). **d**, Total number of mutations assigned to specific SBS signatures  
436 for patients from East Asia or North America and Europe. **e**, Volcano plot indicating enrichment  
437 of mutations in driver genes affecting specific LCINS adenocarcinomas. Blue-colored genes were  
438 enriched in patients from North America and Europe, whereas red-colored genes were enriched in  
439 patients from East Asia. **f**, Frequency of LCINS adenocarcinoma cases harboring driver mutations  
440 in the driver genes significantly differently mutated between geographical regions (*EGFR*, *TP53*,  
441 and *KRAS*) **g**, Proportion of driver mutations affecting *EGFR*, *TP53*, and *KRAS* probabilistically  
442 assigned to each of the SBS mutational signatures identified in the LCINS adenocarcinoma cohort.  
443 The numbers indicate the total number of driver single base substitutions found in each of the  
444 genes.

445  
446 **Fig. 3. Passive smoking influence in the genomic landscape of LCINS. a-d**, Differences in base  
447 substitution burden and tumor-to-normal telomere length ratio using univariate comparisons (**a**  
448 and **b**) as well as multivariable linear regressions considering clinical and epidemiological  
449 covariates (**c** and **d**), including age, sex, genetic ancestry, histology, and tumor purity. **e**, Volcano  
450 plot indicating enrichment of mutational signatures derived from SBS mutations in passive vs.  
451 non-passive smokers. Horizontal lines marking statistically significant thresholds were included

452 at 0.05 (dashed orange line) and 0.01 FDR levels (dashed red line). **f**, Comparison of the mutations  
453 belonging to each of the six main SBS mutation subtypes in passive vs. non-passive smokers. **g**,  
454 Volcano plot indicating enrichment of mutations in driver genes affecting specific LCINS tumors.  
455

456 **Fig. 4. Mutagenic effects of PM<sub>2.5</sub> exposure in LCINS.** **a**, Quantification of tumor mutational  
457 burden according to different mutation types, including SBS, DBS, and ID, for patients living in  
458 geographical regions with high and low PM<sub>2.5</sub> exposure levels (threshold defined at 20 µg/m<sup>3</sup>; only  
459 samples for which the country of origin was known (*n*=853) are included). **b**, Quantification of the  
460 ratio of telomere lengths for tumor and normal samples across high and low PM<sub>2.5</sub> exposed cases.  
461 **c-d**, Forest plots corresponding to multivariable linear regressions considering high/low PM<sub>2.5</sub>  
462 exposure group, age, sex, genetic ancestry, histology, and tumor sample purity as covariates and  
463 tumor mutational burden for the specific mutation type, SBS, DBS, ID (**c**), or telomere length ratio  
464 (**d**) as independent variables. **e-h**, Scatter plots showing significant correlations between individual  
465 sample estimates of PM<sub>2.5</sub> exposure and tumor mutational burden for SBS (**e**), DBS (**f**), ID (**g**), and  
466 telomere length ratio (**h**).

467  
468 **Fig. 5. Associations between PM<sub>2.5</sub> exposure and specific mutational signatures affecting**  
469 **LCINS tumors.** **a**, Enrichment analysis of the presence of mutational signatures derived from  
470 SBS, DBS, and ID with PM<sub>2.5</sub> exposure levels for all samples for which the country of origin was  
471 known (*n*=853). Horizontal lines marking statistically significant thresholds were included at 0.05  
472 (dashed orange line) and 0.01 FDR levels (dashed red line). The odds ratios for the  
473 increase/decrease of 10 µg/m<sup>3</sup> of PM<sub>2.5</sub> estimates are shown. **b**, Detailed forest plots for the logistic  
474 regression models corresponding to signatures SBS4, SBS5, and ID3. **c-e**, Scatter plots assessing

475 dose-response effect between individual sample estimates of PM<sub>2.5</sub> exposure and mutations  
476 assigned to signatures SBS4 (c), SBS5 (d), and ID3 (e). f, Enrichment analysis of the presence of  
477 mutations in driver genes with PM<sub>2.5</sub> exposure levels. g-h, Detail of the enrichment of *TP53* (g)  
478 and *CTNNB1* (h) driver mutations in high and low pollution regions, respectively.  
479

480 **EXTENDED DATA FIGURE LEGENDS**

481 **Extended Data Fig. 1. Association of mutational signature prevalence and driver mutations**  
482 **with geographical regions, biological sexes, and *EGFR* mutation status in LCINS**  
483 **adenocarcinoma cases. a**, DBS, ID, CN, and SV mutational signatures enrichment analysis with  
484 geographical regions. Horizontal lines marking statistically significant thresholds were included  
485 at 0.05 (dashed orange line) and 0.01 FDR value levels (dashed red line). Blue-colored signatures  
486 were enriched in North American and European patients, whereas red-colored signatures were  
487 enriched in East Asian patients. **b**, SBS, DBS, ID, CN, and SV mutational signatures enrichment  
488 analysis with biological sexes. Blue-colored signatures were enriched in males, whereas red-  
489 colored signatures were enriched in females. **c-e**, Detail of the enrichment of *EGFR* (**c**), *TP53* (**d**),  
490 and *KRAS* (**e**) driver mutations in North American and European vs. East Asian LCINS  
491 adenocarcinoma cases. **f**, Driver mutations enrichment analysis with biological sexes. Blue-  
492 colored genes were enriched in males, whereas red-colored genes were enriched in females. **h**,  
493 SBS, DBS, ID, CN, and SV mutational signatures enrichment analysis with *EGFR* mutation status.  
494 Blue-colored signatures were enriched in *EGFR* mutant tumors, whereas red-colored signatures  
495 were enriched in *EGFR* wild-type tumors.

496

497 **Extended Data Fig. 2. Tumor mutational burden differences in LCINS across histologies. a-**  
498 **b**, Quantification of tumor mutational burden according to different mutation types, including SBS,  
499 DBS, ID, number of copy number segments, and structural variants (**a**), as well as telomere length  
500 ratios between tumor and normal samples (**b**) across histologies.

501

502 **Extended Data Fig. 3. Repertoire of mutational signatures and driver mutations in LCINS**  
503 **carcinoids. a-b**, Mutational signature landscape for SBS (a) and ID (b) mutation types, including  
504 absolute and relative number of mutations assigned to each mutational signature, unsupervised  
505 clustering based on the signature contributions, and sample-level annotations of sex, genetic  
506 ancestry, and accuracy of signature reconstruction based on cosine similarity. c, Driver mutations  
507 landscape, including different types of genomic alterations, as well as sample-level annotations of  
508 sex, genetic ancestry, histology, and tumor purity.

509  
510 **Extended Data Fig. 4. Association of mutational signature prevalence and driver mutations**  
511 **with adenocarcinoma and carcinoid histology in LCINS cases. a-b** SBS, DBS, ID, CN, and SV  
512 mutational signatures, and driver mutations (b) enrichment analysis. Horizontal lines marking  
513 statistically significant thresholds were included at 0.05 (dashed orange line) and 0.01 FDR value  
514 levels (dashed red line). Blue-colored signatures/genes were enriched in adenocarcinomas,  
515 whereas green-colored signatures/genes were enriched in carcinoids. c-d, Detail of the enrichment  
516 of *TP53* (c) and *ARID1A* (d) driver mutations in carcinoid vs. adenocarcinoma LCINS.

517  
518 **Extended Data Fig. 5. Genomic landscape in LCINS squamous cell carcinomas. a-c**,  
519 Mutational signature landscape for SBS (a), DBS (b), and ID (c) mutation types, including  
520 absolute and relative number of mutations assigned to each mutational signature, unsupervised  
521 clustering based on the signature contributions, and sample-level annotations of sex, genetic  
522 ancestry, and accuracy of signature reconstruction based on cosine similarity. d, Driver mutations  
523 landscape, including different types of genomic alterations, as well as sample-level annotations of  
524 sex, genetic ancestry, histology, and tumor purity.

525

526 **Extended Data Fig. 6. Association of mutational signature prevalence and driver mutations**  
527 **with adenocarcinoma and squamous cell carcinoma histology in LCINS cases. a-b** SBS, DBS,  
528 ID, CN, and SV (a) mutational signatures, and driver mutations (b) enrichment analysis.  
529 Horizontal lines marking statistically significant thresholds were included at 0.05 (dashed orange  
530 line) and 0.01 FDR value levels (dashed red line). Blue-colored signatures/genes were enriched in  
531 adenocarcinomas, whereas red-colored signatures/genes were enriched in squamous cell  
532 carcinomas. c-f, Detail of the enrichment of *TP53* (c), *EGFR* (d), *LRP1B* (e), *PTEN* (f) and  
533 *PIK3CA* (g) driver mutations in squamous cell carcinoma vs. adenocarcinoma LCINS.

534

535 **Extended Data Fig. 7. Genomic landscape of 56 LCINS tumors presenting SBS4 activity. a,**  
536 Tumor mutational burden differences between SBS4 positive and negative LCINS tumors for SBS,  
537 DBS, ID, CN segments, and SV events. b-d, Mutational signature landscape for SBS (b), DBS (c),  
538 and ID (d) mutation types, including absolute and relative number of mutations assigned to each  
539 mutational signature, unsupervised clustering based on the signature contributions, and sample-  
540 level annotations of sex, genetic ancestry, passive smoking, and accuracy of signature  
541 reconstruction based on cosine similarity. e, Driver mutations landscape, including different types  
542 of genomic alterations, as well as sample-level annotations of sex, genetic ancestry, histology, and  
543 tumor purity.

544

545 **Extended Data Fig. 8. Topographical characteristics of 56 LCINS and 68 lung cancer from**  
546 **smokers presenting SBS4 activity. a-b,** Distribution of SBS4 mutations with replication timing  
547 in our cohort of never smokers (a) and in the smokers from the PCAWG cohort (b). Data are

548 separated into deciles, with each segment harboring 10% of the observed replication time signal  
549 in the x-axis, and the normalized mutational density displayed in the y-axis. **c-d**, Association of  
550 SBS4 mutations with nucleosome occupancy in never smokers (**c**) and smokers (**d**). The solid blue  
551 line represents real somatic mutations, whereas the dashed grey line indicates the distribution of  
552 simulated mutations. Both lines show the average nucleosome signal in the y-axis, using a genomic  
553 window of 2 kilobases centered around the SBS4-associated mutations in the x-axis. **e-f**, Strand  
554 asymmetry of SBS4-associated mutations in comparison to simulations and considering lagging  
555 and leading DNA strands, transcribed and untranscribed DNA regions and genic and intergenic  
556 genomic locations in never smokers (**e**) and smokers (**f**).

557

558 **Extended Data Fig. 9. Passive smoking influence in the landscape of ID, DBS, CN, and SV in**  
559 **LCINS. a-e**, Differences in DBS, ID, CN, and SV burden using univariate comparisons (**a**) as well  
560 as multivariable linear regressions considering clinical and epidemiological covariates (**b-e**),  
561 including age, sex, genetic ancestry, and tumor purity. **f**, Volcano plots indicating enrichment of  
562 mutational signatures derived from DBS, ID, CN, and SV alterations. Horizontal lines marking  
563 statistically significant thresholds were included at 0.05 (dashed orange line) and 0.01 FDR value  
564 levels (dashed red line).

565

566 **Extended Data Fig. 10. Effects of PM<sub>2.5</sub> exposure in large genomic alterations in LCINS. a-**  
567 **b**, Differences in the number of CN segments and SV events using univariate comparisons (**a**) as  
568 well as multivariable linear regressions, considering clinical and epidemiological covariates (**b**),  
569 including age, sex, genetic ancestry, histology, and tumor purity, for patients diagnosed in  
570 geographical regions with high and low PM<sub>2.5</sub> exposure levels (threshold defined at 20 µg/m<sup>3</sup>; only

571 samples for which the country of origin was known,  $n=853$ , were included). **c**, Volcano plots  
572 indicating enrichment of mutational signatures derived from CN and SV alterations. Horizontal  
573 lines marking statistically significant thresholds were included at 0.05 (dashed orange line) and  
574 0.01 FDR value levels (dashed red line).

575  
576 **Extended Data Fig. 11. Assignment of mutational signatures and estimation of telomere**  
577 **length using data from control ( $n=5$ ) and PM<sub>2.5</sub>-exposed mice ( $n=5$ ) from Ref.<sup>48</sup>. **a-b**, Boxplots**  
578 comparing the mutations assigned to SBS5 (**a**) and the estimations for the telomere length ratio  
579 between the tumor and normal samples (**b**). Student's t-tests were used to calculate statistical  
580 significance.

581  
582 **Extended Data Fig. 12. Mutagenic effects of PM<sub>2.5</sub> exposure in LCINS cases excluding SBS4**  
583 **contributions. **a****, Quantification of SBS burden excluding SBS4 mutations for patients living in  
584 geographical regions with high and low PM<sub>2.5</sub> exposure levels (threshold defined at 20  $\mu\text{g}/\text{m}^3$ ; only  
585 samples for which the country of origin was known,  $n=853$ , were included). **b**, Forest plot  
586 corresponding to a multivariable linear regression considering high/low PM<sub>2.5</sub> exposure group,  
587 age, sex, genetic ancestry, histology, and tumor sample purity as covariates and SBS burden as  
588 independent variable. **c**, Scatter plot showing a significant correlation between individual sample  
589 estimates of PM<sub>2.5</sub> exposure and SBS burden.



590 **SUPPLEMENTARY MATERIAL LEGENDS**

591 **Supplementary Table 1. Clinical characteristics of the Sherlock-*Lung* never-smoking lung**  
592 **cancer cohort by histology.**

593

594 **Supplementary Table 2. Mutational profiles for SBS *de novo* extracted mutational**  
595 **signatures using the SBS-288 mutational context.**

596

597 **Supplementary Table 3. Mutational profiles for ID *de novo* extracted mutational signatures**  
598 **using the ID-83 mutational context.**

599

600 **Supplementary Table 4. Mutational profiles for DBS *de novo* extracted mutational**  
601 **signatures using the DBS-78 mutational context.**

602

603 **Supplementary Table 5. Mutational profiles for CN *de novo* extracted mutational**  
604 **signatures using the CN-68 mutational context.**

605

606 **Supplementary Table 6. Mutational profiles for SV *de novo* extracted mutational**  
607 **signatures using the SV-38 mutational context.**

608

609 **Supplementary Table 7. Decomposition of SBS *de novo* mutational signatures into**  
610 **COSMICv3.4 reference signatures.**

611

612 **Supplementary Table 8. Decomposition of ID *de novo* mutational signatures into**  
613 **COSMICv3.4 reference signatures.**

614

615 **Supplementary Table 9. Decomposition of DBS *de novo* mutational signatures into**  
616 **COSMICv3.4 reference signatures.**

617

618 **Supplementary Table 10. Decomposition of CN *de novo* mutational signatures into**  
619 **COSMICv3.4 reference signatures.**

620

621 **Supplementary Table 11. Decomposition of SV *de novo* mutational signatures into**  
622 **COSMICv3.4 reference signatures.**

623

624 **Supplementary Table 12. Associations of passive smoking and pollution with genomic**  
625 **features adjusted by genetic ancestry principal components.**

626

627 **Supplementary Table 13. dbGaP and EGA unique identifiers for the publicly available**  
628 **datasets included as part of the analyzed LCINS cohort.**

629

630 **Supplementary Fig. 1. *De novo* mutational signatures extracted using the SBS-288**  
631 **mutational context. a, Mutational profiles of the *de novo* extracted signatures, with indication of**  
632 **the cosine similarity of the decomposition into COSMICv3.4 reference signatures. b, Contribution**  
633 **of the different COSMICv3.4 reference mutational signatures after decomposition of the *de novo***  
634 **extracted signatures. c, Activity of *de novo* mutational signatures across samples, representing the**

635 total number of substitutions attributed to each signature in a given sample. Dots represent  
636 individual samples, colors different histology types, and purple horizontal bars median values  
637 across all histologies. The numbers on top indicate the total number of samples where a particular  
638 signature was found active (blue) and the total number of samples of the assessed cohort (green).

639

640 **Supplementary Fig. 2. *De novo* mutational signatures extracted using the ID-83 mutational**

641 **context. a**, Mutational profiles of the *de novo* extracted signatures. **b**, Contribution of the different

642 COSMICv3.4 reference mutational signatures after decomposition of the *de novo* extracted

643 signatures. **c**, Activity of *de novo* mutational signatures across samples, representing the total

644 number of indels attributed to each signature in a given sample. Dots represent individual samples,

645 colors represent different histology types, and purple horizontal bars represent median values

646 across all histologies. The numbers on top indicate the total number of samples where a particular

647 signature was found active (blue) and the total number of samples of the assessed cohort (green).

648

649 **Supplementary Fig. 3. *De novo* mutational signatures extracted using the DBS-78 mutational**

650 **context. a**, Mutational profiles of the *de novo* extracted signatures. **b**, Contribution of the different

651 COSMIC v3.4 reference mutational signatures after decomposition of the *de novo* extracted

652 signatures. **c**, Activity of *de novo* mutational signatures across samples, representing the total

653 number of doublets attributed to each signature in a given sample. Dots represent individual

654 samples, colors represent different histology types, and purple horizontal bars represent median

655 values across all histologies. The numbers on top indicate the total number of samples where a

656 particular signature was found active (blue) and the total number of samples of the assessed cohort

657 (green).

658

659 **Supplementary Fig. 4. *De novo* mutational signatures extracted using the CN-68 mutational**  
660 **context. a,** Mutational profiles of the *de novo* extracted signatures. **b,** Contribution of the different  
661 COSMICv3.4 reference mutational signatures after decomposition of the *de novo* extracted  
662 signatures. **c,** Activity of *de novo* mutational signatures across samples, representing the total  
663 number of copy number segments attributed to each signature in a given sample. Dots represent  
664 individual samples, colors represent different histology types, and purple horizontal bars represent  
665 median values across all histologies. The numbers on top indicate the total number of samples  
666 where a particular signature was found active (blue) and the total number of samples of the  
667 assessed cohort (green).

668

669 **Supplementary Fig. 5. *De novo* mutational signatures extracted using the SV-38 mutational**  
670 **context. a,** Mutational profiles of the *de novo* extracted signatures. **b,** Contribution of the different  
671 COSMIC v3.4 reference mutational signatures after decomposition of the *de novo* extracted  
672 signatures. **c,** Activity of *de novo* mutational signatures across samples, representing the total  
673 number of structural variants attributed to each signature in a given sample. Dots represent  
674 individual samples, colors represent different histology types, and purple horizontal bars represent  
675 median values across all histologies. The numbers on top indicate the total number of samples  
676 where a particular signature was found active (blue) and the total number of samples of the  
677 assessed cohort (green).

678

679 **Supplementary Fig. 6. Validation of homologous recombination deficient cases in LCINS**  
680 **using computational predictors.** The x-axis shows the probability prediction scores for all the

681 LCINS cases in the cohort (categorized by histology and presence of signature SBS3) using  
682 HRDetect<sup>31</sup>, whereas the y-axis shows the probability prediction scores for CHORD<sup>30</sup>. Dashed  
683 lines showed the thresholds proposed by both computational tools for considering a sample as  
684 homologous recombination deficient or proficient.

685

686 **Supplementary Fig. 7. Sensitivity analysis of the associations of mutational signatures with**  
687 **geographical regions excluding Canadian patients with EAS genetic ancestry.** Volcano plot  
688 indicating enrichment of SBS signatures in patients from East Asian (AS) and North  
689 American/European regions (NA/EU) in LCINS adenocarcinomas (top panel) and bar plot  
690 indicating prevalence by geographical region (bottom panel). Horizontal lines marking  
691 statistically significant thresholds were included at 0.05 (dashed orange line) and 0.01 FDR  
692 levels (dashed red line).

693

694 **Supplementary Fig. 8. Passive smoking influence in the genomic landscape of lung**  
695 **adenocarcinomas from never smokers. a-d,** Differences in base substitution burden and  
696 telomere length ratio between tumor and normal samples using univariate comparisons (**a** and **b**)  
697 as well as multivariable linear regressions considering clinical and epidemiological covariates (**c**  
698 and **d**), including age, sex, genetic ancestry, and tumor purity.

699

700 **Supplementary Fig. 9. Assessment of the resolution to assign signature SBS4 in cases exposed**  
701 **to secondhand smoke.** COSMICv3.4 mutational signatures obtained for the whole cohort of  
702 LCINS patients were assigned to 247 tumors from SBS4-negative patients exposed to secondhand  
703 smoke after the synthetic injection of SBS4 at different levels (1%, 2%, 5%, 10%, 15%, and 20%;

704 100 simulations per injection level). **a**, Boxplots showing the distribution of the proportion of  
705 samples where SBS4 was detected for different simulations within a synthetic injection level. **b**,  
706 Detail of the SBS4 contributions observed in the synthetic samples, where each row corresponds  
707 to a sample, each column to a simulation corresponding to a specific injection level, and the color  
708 represents the contribution level of SBS4 to the overall mutational profile.

709

710 **Supplementary Fig. 10. Split of samples in pollution exposure groups according to their levels**  
711 **of estimated population weighted PM<sub>2.5</sub>.** Limit used for the two-group classification (high-low;  
712 20 µg/m<sup>3</sup>; 440 high exposed samples vs. 413 low exposed samples).

## 713 **ONLINE METHODS**

### 714 **Ethics declarations**

715 Since the National Cancer Institute only received de-identified samples and data from  
716 collaborating centers, had no direct contact or interaction with the study participants, and did not  
717 use or generate identifiable private information, *Sherlock-Lung* has been determined to constitute  
718 “Not Human Subject Research (NHSR)” based on the federal Common Rule (45 CFR 46;  
719 <https://www.ecfr.gov/cgi-bin/ECFR?page=browse>).

720

### 721 **Collection of lung cancer samples**

722 Fresh-frozen tumor tissue and matched germline DNA from whole-blood samples or fresh-frozen  
723 normal lung tissue sampled approximately 3 cm from the tumor were obtained from 871 treatment-  
724 naïve lung cancer patients from 14 institutions/centers across the world after sample and  
725 sequencing quality control. Among these patients, 114 were from the Institut universitaire de  
726 cardiologie et de pneumologie de Québec – Université Laval (IUCPQ-UL), Quebec, Canada; 54  
727 from Université Côte d’Azur, Nice, France; 25 from the EAGLE study from Italy<sup>53</sup>; 22 from Yale  
728 University, New Haven, Connecticut, USA; 11 from H. Lee Moffitt Cancer Center & Research  
729 Institute, Tampa, Florida, USA; 27 from Harvard University, Cambridge, Massachusetts, USA;  
730 113 from Hong-Kong; 192 from the International Agency for Research on Cancer, Lyon, France;  
731 13 from Mayo Clinic, Rochester, Minnesota, USA; 13 from Roswell Park Comprehensive Cancer  
732 Center, Buffalo, New York, USA; 185 from Taipei; 68 from Toronto, Canada; 5 from Valencia,  
733 Spain; and 29 from previously published and publicly available whole-genome sequenced (WGS)  
734 lung cancers from never smokers (**Supplementary Table 13**). For these 871 individuals, the mean  
735 age at lung cancer diagnosis was 64.1 years (range: 21–92) and 79.0% of patients were female.

736  
737 Similar to our prior publication<sup>19</sup>, we utilized seven rigorous criteria for sample inclusion: (i)  
738 *Sequencing coverage*. We maintained a minimum average sequencing coverage of >40x for tumor  
739 samples and >25x for normal samples; (ii) *Contamination and Relatedness*. Cross-sample  
740 contamination was limited to <1% by Conpair<sup>54</sup>, and detected relatedness was maintained <0.2 by  
741 Somalier<sup>55</sup>; (iii) *Copy number analysis*. Subjects with abnormal copy number profiles in normal  
742 samples were excluded, as determined by Battenberg<sup>56</sup>; (iv) *Mutational signatures*. Tumor samples  
743 exhibiting mutational signatures SBS7 (associated with ultraviolet light exposure<sup>41</sup>) and SBS31  
744 (associated with platinum chemotherapy<sup>57</sup>) were removed from the analysis. (v) *Tumor type*  
745 *validation*. Tumor samples reported as non-lung cancer or not originating from primary lung  
746 cancer were excluded. (vi) *WGS quality control*. Tumor samples with a total genomic alteration  
747 count of <100 or <1000 along with NRPC (the number of reads per clonal copy)<sup>58</sup> <10 were  
748 excluded as low-quality samples. (vii) *Multiple-region sequencing*. In rare cases where multiple  
749 regions of a tumor were sequenced, only one high-purity tumor sample was included to avoid  
750 redundancy. These stringent criteria were applied consistently to ensure the robustness and  
751 reliability of the data collected for the Sherlock-*Lung* study.

752  
753 All 871 matched tumor and germline samples underwent DNA WGS. Except for the 29 previously  
754 generated WGS cancers<sup>18,59-62</sup>, sequencing was performed the same for all other samples.  
755 Specifically, frozen tumor tissue with matched blood or normal tissue samples were immediately  
756 put into 1ml of 0.2 mg/ml Proteinase K (Qiagen) in DNA lysis buffer (10 mM Tris-Cl (pH 8.0),  
757 0.1 M EDTA (pH 8.0), and 0.5% (w/v) SDS) for 24 hours at 56°C with shaking at 850 rpm in  
758 Thermomixer R (Eppendorf) until the tissue was completely lysed. Genomic DNA was extracted



759 from fresh frozen tissue using the QIAmp DNA Mini Kit (Qiagen) according to the manufacturer's  
760 instructions. Each sample was eluted in 200 µl AE buffer and DNA concentration was determined  
761 by Nanodrop spectrophotometer. All DNA samples were aliquoted and stored at -80°C until use.  
762  
763 DNA was quantified using the QuantiFluor® dsDNA System (Promega Corporation, USA). DNA  
764 was normalized to 25ng/ul and underwent fragment analysis via AmpFLSTR™ Identifiler™ PCR  
765 Amplification Kit (ThermoFisher Scientific, USA). DNA samples are required to meet minimum  
766 mass and concentration thresholds for each assay, as well as show no evidence of contamination  
767 or profile discordance in the Identifiler assay. Samples meeting these requirements were aliquoted  
768 at the appropriate mass needed for downstream assay processing.

769

#### 770 **Whole-genome sequencing (WGS)**

771 The resulting post-capture enriched multiplexed sequencing libraries were used in cluster  
772 formation on an Illumina cBOT (Illumina, San Diego, CA, USA). Paired-end sequencing was  
773 performed by the Broad Institute (<https://www.broadinstitute.org>) using the Illumina HiSeq X  
774 system following Illumina-provided protocols for 2x151bp paired-end sequencing. FASTQ files  
775 were generated after Illumina base-calling. Next, paired FASTQ were converted to unmapped  
776 BAM using the GATK pipeline (<https://github.com/gatk-workflows/seq-format-conversion>). The  
777 unmapped BAM files were then processed using GATK on the cloud-based platform TERRA  
778 workspaces (<https://app.terra.bio>). The sequence data were aligned to the human reference genome  
779 GRCh38, and the aligned BAM files were transferred to the NIH HPC system (<https://hpc.nih.gov>)  
780 for downstream analyses.

781

782 For the public WGS data, the preprocessed aligned BAM/CRAM files (including unmapped reads)  
783 were first converted back to FASTQ files using Bazam (v.1.0.1)<sup>63</sup> to retain the sequencing lane  
784 and read group information and then processed using the same pipeline as for the Sherlock-*Lung*  
785 WGS dataset.

786

### 787 **Somatic variant calling**

788 The somatic variant calling was performed using our established bioinformatics pipeline as  
789 previously described<sup>19</sup>. The analysis-ready BAM files were processed using four different  
790 mutation calling algorithms for tumor-normal paired analysis, including MuTect<sup>64</sup>, MuTect2,  
791 Strelka v.2.9.10<sup>65</sup> and TNscope<sup>66</sup>, implemented in the Sentieon's genomics software (v202010.01).  
792 We employed an ensemble method to merge the results from these different callers followed by  
793 additional filtering to reduce false positive calling. The final mutation calls for both single base  
794 substitutions (SBSs) and small insertions and deletions (indels) were required to meet the  
795 following criteria: (i) read depth >12 in tumor samples and >6 in normal samples; (ii) variant allele  
796 frequency <0.02 in the matched-normal sample; and (iii) overall allele frequency (AF) <0.001 in  
797 multiple genetics databases including 1000 Genomes (phase 3 v5), gnomAD exomes (v2.1.1), and  
798 gnomAD genomes (v3.0)<sup>67</sup>. The filtered variants were annotated with Oncotator v.1.9.1.0<sup>68</sup> and  
799 ANNOVAR v.2019-10-2495. For the indel calling, only variants called by at least three algorithms  
800 were kept (MuTect2, Strelka, and TNscope). The UPS-indel<sup>69</sup> algorithm was used to compare and  
801 combine different indel call sets. Similar filtering steps as those used for SNV calling were also  
802 applied to indel calling. The final set of indels were left-normalized (left-aligned and trimmed) for  
803 the downstream analysis.

804

805 **Ancestry estimation**

806 To confirm the genetic ancestry of the patients, we calculated the principal component (PC)  
807 coordinates based on WGS data. This analysis was performed using the VerifyBamID (v.2.0.1)  
808 algorithm<sup>70</sup> in conjunction with samples from the 1000 Genomes Project<sup>21</sup>.

809

810 **Driver gene discovery**

811 The IntOGen pipeline v2020.02.0123<sup>71</sup>, which combines seven state-of-the-art computational  
812 methods, was employed to detect signals of positive selection in the mutational pattern of driver  
813 genes across the cohort. The 65 genes identified as drivers with combination q-value<0.1 in the  
814 cohort were classified according to their mode of action in tumorigenesis (*i.e.*, tumor suppressor  
815 genes or oncogenes) based on the relationship between the excess of observed nonsynonymous  
816 and truncating mutations computed by dNdScv<sup>72</sup> and their annotations in the Cancer Gene  
817 Census<sup>73</sup>. Genes with conflicting computed and annotated modes of action were labeled  
818 ambiguous. To identify potential driver mutations across the 65 cancer driver genes annotated in  
819 the Cancer Gene Census, we selected mutations that fulfilled any of the following criteria: (*i*)  
820 truncating mutations in genes annotated as tumor suppressors; (*ii*) recurrent missense mutations  
821 (seen in at least three independent tumors); (*iii*) mutations classified as “Likely Drivers” by  
822 boostDM (score >0.5)<sup>74</sup>; (*iv*) mutations classified as “Oncogenic” or “Likely Oncogenic” by  
823 OncoKB<sup>75</sup>; (*v*) mutations classified as drivers in the TCGA MC3 drivers study<sup>76</sup>; (*vi*) missense  
824 mutations classified as “Likely Pathogenic” by AlphaMissense<sup>77</sup> in genes annotated as tumor  
825 suppressors.

826

827 **Estimation of tumor purity, ploidy, and allele-specific copy numbers**

828 We used the Battenberg algorithm (v2.2.9)<sup>56</sup> to conduct analyses of somatic copy number  
829 alterations (SCNA). Initial SCNA profiles were generated, followed by an assessment of the  
830 clonality of each segment, purity, and ploidy. Any SCNA profile determined to have low-quality  
831 after manual inspection underwent a refitting process using the Battenberg algorithm. This process  
832 required new tumor purity and ploidy inputs, either estimated by ccube (v1.0)<sup>78</sup> or recalculated  
833 from local copy number status. The Battenberg refitting procedures were iteratively executed until  
834 the final SCNA profile was established and met the criteria of manual validation check. GISTIC  
835 (v2.0)<sup>79</sup> was used to identify the recurrent copy number alterations at the gene level based on the  
836 major clonal copy number for each segmentation.

837

### 838 **Structural variants calling**

839 Meerkat (v.0.189)<sup>80</sup> and Manta (v.1.6.0)<sup>81</sup> were applied with recommended filtering for identifying  
840 structural variants (SVs), and the union set of these two callers was merged as the final SV dataset.

841

### 842 **Telomere length**

843 We estimated telomere length in kb using TelSeq (v.0.0.2)<sup>82</sup> for all 871 LCINS samples as well as  
844 mouse data from a recent experimental study, including control and PM<sub>2.5</sub>-exposed mice<sup>48</sup>. We  
845 used seven as the threshold for the number of TTAGGG/CCCTAA repeats in a read for the read  
846 to be considered telomeric. The TelSeq calculation was done individually for each read group  
847 within a sample, and the total number of reads in each read group was used as weight to calculate  
848 the average TL for each sample.

849

850

851 **Mutational signature analysis**

852 ***Extraction of de novo mutational signatures***

853 *De novo* mutational signatures for single base substitutions (SBS), doublet base substitutions  
854 (DBS), and indels (ID) were extracted using SigProfilerExtractor<sup>22</sup> v1.1.21 with default parameters  
855 and normalization set to 10,000 mutations, in order to limit the effect of hypermutators in the  
856 signature extraction process. For SBSs, *de novo* signatures were extracted using the SBS-288 and  
857 SBS-1536 high-definition mutational contexts, which, beyond the common SBS-96 trinucleotide  
858 context using the mutated base and the 5' and 3' adjacent nucleotides<sup>83,84</sup>, also consider the  
859 transcriptional strand bias and the pentanucleotide context (two 5' and 3' adjacent nucleotides),  
860 respectively<sup>84</sup>. Given the high similarity obtained for both mutational contexts as well as the  
861 additional separation of mutational processes obtained by the SBS-288 mutational context (11 *de*  
862 *novo* signatures using SBS-288 vs. 10 *de novo* signatures using SBS-1536; average cosine  
863 similarity 0.97), the results using the SBS-288 context were used for further analysis  
864 (**Supplementary Table 2**). Previously established mutational contexts DBS-78 and ID-83<sup>15,84</sup>  
865 were used for the extraction of DBS and ID signatures (**Supplementary Tables 3-4**). Copy number  
866 signatures were extracted *de novo* following an updated context definition benefitting from deep  
867 WGS data (CN-68) (**Supplementary Table 5**), which allowed to further characterize CN segments  
868 below 100kbp in length (in contrast to current COSMICv3.4 reference signatures using the CN-48  
869 context, which are based on SNP6 microarray data and therefore without the resolution to  
870 characterize short CN segments)<sup>26</sup>. SV signatures were extracted using a similarly refined context,  
871 with an in-depth characterization of short SV alterations below 1kbp (SV-38 context;  
872 **Supplementary Table 6**).

873

874 ***Decomposition and assignment of mutational signatures to individual tumors***

875 After *de novo* extraction was completed, SigProfilerAssignment<sup>85</sup> v0.1.1 was used to decompose  
876 the *de novo* extracted SBS, ID, DBS, CN, and SV mutational signatures into COSMICv3.4<sup>23</sup>  
877 reference signatures based on the GRCh38 reference genome (**Supplementary Tables 7-11**) as  
878 well as to assign signatures to individual samples obtaining signature activities, based on the  
879 forward stagewise algorithm for sparse regression and nonnegative least squares for numerical  
880 optimization. Hierarchical clustering of the activities of mutational signatures was performed using  
881 Euclidean distance and Ward's minimum-variance clustering. For the SBS signatures, the 11 *de*  
882 *nov*o extracted signatures were originally decomposed into 15 COSMICv3.4 reference signatures.  
883 However, two of the COSMICv3.4 signatures, enriched in C>T substitutions, were removed from  
884 the decomposition to avoid misassignment, namely SBS23 and SBS32, as the patterns of strong  
885 transcriptional strand bias generated by these two signatures<sup>15</sup> were not observed in our LCINS  
886 dataset, and their individual contribution to the decomposition of *de novo* signatures was minimal.  
887 On the other hand, five additional COSMICv3.4 SBS signatures were included for the assignment  
888 to individual samples, including SBS3, SBS21, SBS33, SBS44, and SBS92. SBS3 and SBS92  
889 were included considering their previously reported strong associations with indel signatures ID6  
890 and ID3, both of which were observed in our indel signature analysis after decomposition to  
891 COSMICv3.4 ID signatures<sup>15,22,43</sup>. Thus, for those tumors harboring ID6 ( $n=41$ ), we allowed  
892 assigning SBS3 (assigned only to 14 of the cases), whereas for those tumors with presence of ID3  
893 ( $n=300$ ), SBS92 was allowed in the assignment (assigned to 6 tumors). Suspected homologous  
894 recombination deficient (HRD) tumors exhibiting signatures SBS3 and ID6 were tested using two  
895 independent computational algorithms, CHORD<sup>30</sup> and HRDetect<sup>31</sup>. Lastly, two samples showing  
896 a low cosine similarity for the mutational profile reconstruction (NSLC-0477 and NSLC-0637)

897 showed high similarities in their mutational profiles with signatures linked to microsatellite  
898 instability (MSI) and COSMIC SBS33, respectively. Considering this, we allowed assignment of  
899 SBS33 and all MSI-associated signatures (SBS6, SBS14, SBS15, SBS20, SBS21, SBS26, and  
900 SBS44), respectively, in each of this specific samples, with SBS21 and SBS44 being finally  
901 assigned to sample NSLC-0477. The MSI phenotype of this sample was independently confirmed  
902 by MMRDetect<sup>25</sup>, and further evidence was collected by exploring the indel landscape, with  
903 10,474 alterations, 29-fold more than the average number of indels in lung adenocarcinomas, and  
904 a strong enrichment of signature ID2, consistent with previously reported MSI cases<sup>15</sup>. The  
905 decomposed COSMICv3.4 SBS signatures obtained in the whole LCINS cohort were used for the  
906 assignment of signatures to the mouse data obtained from a recent publication<sup>48</sup>, after their  
907 renormalization to the mouse genome (mm10 build).

908

### 909 *Assignment of mutational signatures to individual somatic mutations*

910 Signatures were probabilistically assigned to individual somatic mutations using  
911 SigProfilerAssignment based on Bayes' rule and the specific mutational context for the mutation,  
912 as previously described<sup>85</sup>. Briefly, to calculate the probability of a specific mutational signature  
913 being responsible for a mutation in a given mutational context and in a particular sample, we  
914 multiplied the general probability of the signature causing mutations in a specific mutational  
915 context (obtained from the mutational signature profile) by the activity of the signature in the  
916 sample (obtained from the signature activities), and then normalized this value dividing by the  
917 total number of mutations corresponding to the specific mutational context (obtained from the  
918 reconstructed mutational profile of the sample).

919

## 920 **Assessment of statistical power to assign mutational signatures in passive smokers**

921 To assess the statistical power to assign SBS4 in passive smokers, we performed simulations where  
922 SBS4 was injected at different average levels (1%, 2%, 5%, 10%, 15%, and 20% of total mutations  
923 in each sample; 100 simulations for each injection level) in all 247 tumors from passive smoker  
924 patients lacking SBS4. For each sample, prior to the injection of SBS4, the number of mutations  
925 to be injected into the sample was randomly subtracted from the sample while ensuring all  
926 mutation counts were still non-negative. Next, SBS4 mutations were injected at the current level  
927 being tested. After, 10% Gaussian noise was added to the resulting mutational profile.  
928 Subsequently, mutational signatures were re-assigned in each sample using  
929 SigProfilerAssignment<sup>85</sup> as well as the 18 SBS COSMICv3.4 reference signatures considered for  
930 the original data using default parameters except for a relaxed addition penalty  
931 (`nls_add_penalty=0.01`) in order to increase the sensitivity of the signature assignment analysis.

932

## 933 **Evaluating the topography of mutational signatures**

934 Topography analyses specific for the 56 SBS4 positive samples as well as 68 lung cancer  
935 samples from smoker patients from the Pan-Cancer Analysis of Whole Genomes (PCAWG)  
936 cohort<sup>45</sup> were carried out with SigProfilerTopography<sup>86</sup>, which evaluates the effect of DNA  
937 replication, DNA transcription, chromatin organization, histone modifications, and transcription  
938 factor binding on the activities of different mutational processes. SigProfilerTopography  
939 examines the distribution of topographical features and narrows down the analyses by calculating  
940 the average signal of each feature in the close vicinity of the somatic mutations. Next, all the  
941 results of somatic mutations are statistically compared with those from simulated mutations that



942 account for the patterns of all operative mutational signatures within an examined sample to  
943 elucidate statistically significant differences.

#### 944 **Estimating air pollution**

945 Annual country-level population-weighted mean concentration estimates of the environmental  
946 particulate matter measuring  $\leq 2.5 \mu\text{m}$  ( $\text{PM}_{2.5}$ ) ( $\mu\text{g}/\text{m}^3$ ) from 1998–2021 were obtained from a  
947 hybrid model combining measurements of aerosol optical depth from different satellites (MODIS,  
948 VIIRS, MISR, and SeaWiFS) with chemical transport modeling (GEOS-Chem) and ground-based  
949 photometer (AERONET) observations<sup>49</sup>, and downloaded from  
950 <https://sites.wustl.edu/acag/datasets/surface-pm2-5/>. Additional state-level and provincial-level  
951 yearly mean estimates were also used for the patients from the United States and Canada,  
952 respectively. An individual estimate of the  $\text{PM}_{2.5}$  exposure for each patient was calculated by  
953 averaging the annual mean concentration values from the year of lung cancer diagnosis (calculated  
954 by adding the age of diagnosis to the year of birth) until the earliest year with data available, i.e.,  
955 1998. For two patients diagnosed before 1998, as well as for 28 patients whose age of diagnosis  
956 or year of birth was unknown, the  $\text{PM}_{2.5}$  estimates for 1998 were considered.  $\text{PM}_{2.5}$  estimates were  
957 not available for 18 cases for which the country of residence was unknown. For the dichotomized  
958 analysis between high and low polluted regions according to the levels of individual estimates of  
959 the  $\text{PM}_{2.5}$  exposure, a threshold of  $20 \mu\text{g}/\text{m}^3$  was used, considering the distribution of  $\text{PM}_{2.5}$   
960 estimates across the whole cohort (**Supplementary Fig. 10**).

961

962 **Association of geographical regions, histologies, *EGFR* driver mutation status, air**  
963 **pollution, and passive smoking with genomic features**

964 In order to quantify the influence of passive smoking and air pollution on the number of total  
965 somatic mutations and the ratio of telomere length between tumor and normal samples, we fitted  
966 a series of multivariable linear models, including adjustments for several confounding covariates,  
967 namely age, sex, genetic ancestry, histology, and tumor purity. The total number of mutations  
968 ( $\log_{10}$  scale) or telomere length ratio ( $\log_2$  scale) served as dependent variables for the linear  
969 regressions, respectively, whereas passive smoking/air pollution groups and covariates were used  
970 as independent variables. In addition, for assessing the dose-response effect of air pollution, we  
971 fitted multivariable linear regressions using the individual  $PM_{2.5}$  estimates per sample, considering  
972 similar adjustments as in the analysis by pollution groups. Genetic ancestry was primarily  
973 considered for the adjustments based on the super-samples from the 1,000 Genomes Project<sup>21</sup>,  
974 classifying the samples into EUR, EAS, or Other genetic ancestry (**Fig. 1b**). Additionally, we also  
975 considered the genetic ancestry principal components derived from the WGS data for the  
976 adjustments, with no differences in the associations compared to the ancestry label-based  
977 adjustments (**Supplementary Table 12**)

978

979 Similarly, the presence of specific mutational signatures or mutations in specific driver genes was  
980 modeled based on the influence of geographical region/histology/*EGFR* mutation status/passive  
981 smoking/air pollution and the additional covariates previously considered, including age, sex,  
982 genetic ancestry, tumor purity, and histology (if applicable), by using multivariable logistic  
983 regressions. For this purpose, signature activities were dichotomized into the presence or absence  
984 of a particular signature, and these binary activities served as dependent variables for the logistic  
985 regressions, with geographical regions, *EGFR* mutation status, histology subtypes, passive  
986 smoking groups, or individual  $PM_{2.5}$  estimates, respectively, along with covariates, being used as

987 independent variables. For signatures present in more than 50% of the cases, dichotomization was  
988 done above and below the median of assigned mutations to the overall cohort of LCINS patients  
989 ( $n=871$ ). Signatures SBS21, SBS33, and SBS44 were excluded from the analysis as they were only  
990 found in individual tumors. For the enrichment analysis of mutations in driver genes, the presence  
991 or absence of mutations in specific genes was used as the dependent variable for the logistic  
992 regressions. Only driver genes having driver mutations in more than 2% of cases of the assessed  
993 cohort were considered.

994  
995 In addition, to assess the dose-response effect of air pollution, we fitted multivariable linear  
996 regressions using the individual  $PM_{2.5}$  estimates per sample, considering similar corrections for  
997 covariates and the tumor mutational burden ( $\log_{10}$  scale), the telomere length ratio ( $\log_2$  scale), or  
998 the number of mutations contributed by a given signature ( $\log_{10}$  scale) as the dependent variable.  
999 Only samples where a particular mutational signature was present were considered for the  
1000 multivariable linear regressions. Univariate linear regressions for the average tumor mutational  
1001 burden ( $\log_{10}$  scale), the telomere length ratio ( $\log_2$  scale), or the number of mutations contributed  
1002 by a given signature ( $\log_{10}$  scale) vs. the average  $PM_{2.5}$  per geographical region were used for  
1003 visualization.

1004  
1005 In all cases, p-values were corrected according to the different signatures from the same variant  
1006 type or driver genes considered by using a false-discovery rate correction based on the Benjamini-  
1007 Hochberg method<sup>87</sup> and reported as FDR.  $FDR < 0.05$  were considered statistically significant.

1008  
1009 **Statistical analysis**

1010 All statistical analyses and graphic displays were performed using the R software v4.2.3  
1011 (<https://www.r-project.org/>). Two-sided Fisher's exact tests were used for the enrichment analyses  
1012 of categorical variables. For the comparison of numerical variables across groups, we used non-  
1013 parametric Mann-Whitney (Wilcoxon rank sum) tests. P-values<0.05 were considered statistically  
1014 significant. If multiple hypothesis testing was required, we used a false-discovery rate correction  
1015 based on the Benjamini-Hochberg method<sup>87</sup> and reported FDR. FDR<0.05 were considered  
1016 statistically significant.

1017

#### 1018 **DATA AVAILABILITY**

1019 Normal and tumor-paired CRAM files for the 871 WGS subjects of the Sherlock-*Lung* study have  
1020 been deposited in dbGaP under the accession numbers phs001697.v1.p1. Detailed access  
1021 information for the publicly available datasets can be found in **Supplementary Table 13**.

1022

#### 1023 **CODE AVAILABILITY**

1024 The WGS bioinformatics pipelines can be accessed at <https://github.com/xtmgah/Sherlock-Lung>.  
1025 Battenberg SCNA calling algorithm can be found at <https://github.com/Wedge-lab/battenberg>.

1026

1027 **ACKNOWLEDGEMENTS**

1028 This work was supported by the Intramural Research Program of the National Cancer Institute, US  
1029 National Institute of Health (NIH) (project ZIACP101231 to MTL); by the NIH grants  
1030 R01ES032547-01, R01CA269919-01, and 1U01CA290479-01 to LBA as well as by LBA's  
1031 Packard Fellowship for Science and Engineering. The research performed in LBA's lab was also  
1032 supported by UC San Diego Sanford Stem Cell Institute. The funders had no roles in study design,  
1033 data collection and analysis, decision to publish, or preparation of the manuscript. The  
1034 computational analyses reported in this manuscript have utilized the Triton Shared Computing  
1035 Cluster at the San Diego Supercomputer Center of UC San Diego. We thank the study participants,  
1036 Dr. Peter Kraft for his reviewing of the manuscript and insightful comments, and the staff at Westat  
1037 Inc. for their valuable assistance in collecting samples and corresponding clinical data. This work  
1038 utilized the computational resources of the NIH high-performance computational capabilities  
1039 Biowulf cluster (<http://hpc.nih.gov>).

1040

1041 **COMPETING INTERESTS**

1042 LBA is a co-founder, CSO, scientific advisory member, and consultant for io9, has equity and  
1043 receives income. The terms of this arrangement have been reviewed and approved by the  
1044 University of California, San Diego in accordance with its conflict of interest policies. LBA is also  
1045 a compensated member of the scientific advisory board of Inocras. LBA's spouse is an employee  
1046 of Biotheranostics. ENB and LBA declare U.S. provisional patent application filed with UCSD  
1047 with serial numbers 63/269,033. LBA also declares U.S. provisional applications filed with UCSD  
1048 with serial numbers: 63/366,392; 63/289,601; 63/483,237; 63/412,835; and 63/492,348. LBA is  
1049 also an inventor of a US Patent 10,776,718 for source identification by non-negative matrix

1050 factorization. SRY has received consulting fees from AstraZeneca, Sanofi, Amgen, AbbVie, and  
1051 Sanofi; received speaking fees from AstraZeneca, Medscape, PRIME Education, and Medical  
1052 Learning Institute. All other authors declare that they have no competing interests.

1053 REFERENCES

- 1054 1 Proctor, R. N. Tobacco and the global lung cancer epidemic. *Nature Reviews Cancer* **1**,  
1055 82-86 (2001). <https://doi.org/10.1038/35094091>
- 1056 2 Sun, S., Schiller, J. H. & Gazdar, A. F. Lung cancer in never smokers — a different  
1057 disease. *Nature Reviews Cancer* **7**, 778-790 (2007). <https://doi.org/10.1038/nrc2190>
- 1058 3 Sung, H. *et al.* Global Cancer Statistics 2020: GLOBOCAN Estimates of Incidence and  
1059 Mortality Worldwide for 36 Cancers in 185 Countries. *CA Cancer J Clin* **71**, 209-249  
1060 (2021). <https://doi.org/10.3322/caac.21660>
- 1061 4 Siegel, D. A., Fedewa, S. A., Henley, S. J., Pollack, L. A. & Jemal, A. Proportion of  
1062 Never Smokers Among Men and Women With Lung Cancer in 7 US States. *JAMA Oncol*  
1063 **7**, 302-304 (2021). <https://doi.org/10.1001/jamaoncol.2020.6362>
- 1064 5 Lui, N. S. *et al.* Sub-solid lung adenocarcinoma in Asian versus Caucasian patients:  
1065 different biology but similar outcomes. *J Thorac Dis* **12**, 2161-2171 (2020).  
1066 <https://doi.org/10.21037/jtd.2020.04.37>
- 1067 6 Gaughan, E. M., Cryer, S. K., Yeap, B. Y., Jackman, D. M. & Costa, D. B. Family  
1068 history of lung cancer in never smokers with non-small-cell lung cancer and its  
1069 association with tumors harboring EGFR mutations. *Lung Cancer* **79**, 193-197 (2013).  
1070 <https://doi.org/10.1016/j.lungcan.2012.12.002>
- 1071 7 Toh, C. K. *et al.* Never-smokers with lung cancer: epidemiologic evidence of a distinct  
1072 disease entity. *J Clin Oncol* **24**, 2245-2251 (2006).  
1073 <https://doi.org/10.1200/JCO.2005.04.8033>
- 1074 8 Yano, T. *et al.* Never-smoking nonsmall cell lung cancer as a separate entity:  
1075 clinicopathologic features and survival. *Cancer* **113**, 1012-1018 (2008).  
1076 <https://doi.org/10.1002/cncr.23679>
- 1077 9 Brennan, P. *et al.* High cumulative risk of lung cancer death among smokers and  
1078 nonsmokers in Central and Eastern Europe. *Am J Epidemiol* **164**, 1233-1241 (2006).  
1079 <https://doi.org/10.1093/aje/kwj340>
- 1080 10 Wang, P., Sun, S., Lam, S. & Lockwood, W. W. New insights into the biology and  
1081 development of lung cancer in never smokers-implications for early detection and  
1082 treatment. *J Transl Med* **21**, 585 (2023). <https://doi.org/10.1186/s12967-023-04430-x>
- 1083 11 Tobacco Smoke and Involuntary Smoking. *IARC Monographs on the Evaluation of*  
1084 *Carcinogenic Risks to Humans*. Vol. 83 1-1438 (2004).
- 1085 12 Turner, M. C. *et al.* Outdoor air pollution and cancer: An overview of the current  
1086 evidence and public health recommendations. *CA Cancer J Clin* **70**, 460-479 (2020).  
1087 <https://doi.org/10.3322/caac.21632>
- 1088 13 Ciabattini, M., Rizzello, E., Lucaroni, F., Palombi, L. & Boffetta, P. Systematic review  
1089 and meta-analysis of recent high-quality studies on exposure to particulate matter and risk  
1090 of lung cancer. *Environ Res* **196**, 110440 (2021).  
1091 <https://doi.org/10.1016/j.envres.2020.110440>
- 1092 14 Koh, G., Degasperi, A., Zou, X., Momen, S. & Nik-Zainal, S. Mutational signatures:  
1093 emerging concepts, caveats and clinical applications. *Nat Rev Cancer* **21**, 619-637  
1094 (2021). <https://doi.org/10.1038/s41568-021-00377-7>
- 1095 15 Alexandrov, L. B. *et al.* The repertoire of mutational signatures in human cancer. *Nature*  
1096 **578**, 94-101 (2020). <https://doi.org/10.1038/s41586-020-1943-3>

- 1097 16 ICGC/TCGA Pan-Cancer Analysis of Whole Genomes Consortium, T. Pan-cancer  
1098 analysis of whole genomes. *Nature* **578**, 82-93 (2020). [https://doi.org/10.1038/s41586-](https://doi.org/10.1038/s41586-020-1969-6)  
1099 [020-1969-6](https://doi.org/10.1038/s41586-020-1969-6)
- 1100 17 Wang, X. *et al.* Association between Smoking History and Tumor Mutation Burden in  
1101 Advanced Non-Small Cell Lung Cancer. *Cancer Res* **81**, 2566-2573 (2021).  
1102 <https://doi.org/10.1158/0008-5472.CAN-20-3991>
- 1103 18 Lee, J. J. *et al.* Tracing Oncogene Rearrangements in the Mutational History of Lung  
1104 Adenocarcinoma. *Cell* **177**, 1842-1857 e1821 (2019).  
1105 <https://doi.org/10.1016/j.cell.2019.05.013>
- 1106 19 Zhang, T. *et al.* Genomic and evolutionary classification of lung cancer in never smokers.  
1107 *Nature Genetics* **53**, 1348-1359 (2021). <https://doi.org/10.1038/s41588-021-00920-0>
- 1108 20 Landi, M. T. *et al.* Tracing Lung Cancer Risk Factors Through Mutational Signatures in  
1109 Never-Smokers : The Sherlock-Lung Study. *American Journal of Epidemiology* **190**,  
1110 962-976 (2020). <https://doi.org/10.1093/aje/kwaa234>
- 1111 21 Auton, A. *et al.* A global reference for human genetic variation. *Nature* **526**, 68-74  
1112 (2015). <https://doi.org/10.1038/nature15393>
- 1113 22 Islam, S. M. A. *et al.* Uncovering novel mutational signatures by de novo extraction with  
1114 SigProfilerExtractor. *Cell Genom* **2**, 100179 (2022).  
1115 <https://doi.org/10.1016/j.xgen.2022.100179>
- 1116 23 Sondka, Z. *et al.* COSMIC: a curated database of somatic variants and clinical data for  
1117 cancer. *Nucleic Acids Res* **52**, D1210-D1217 (2024). <https://doi.org/10.1093/nar/gkad986>
- 1118 24 Senkin, S. *et al.* Geographic variation of mutagenic exposures in kidney cancer genomes.  
1119 *Nature* (2024). <https://doi.org/10.1038/s41586-024-07368-2>
- 1120 25 Zou, X. *et al.* A systematic CRISPR screen defines mutational mechanisms underpinning  
1121 signatures caused by replication errors and endogenous DNA damage. *Nature Cancer* **2**,  
1122 643-657 (2021). <https://doi.org/10.1038/s43018-021-00200-0>
- 1123 26 Steele, C. D. *et al.* Signatures of copy number alterations in human cancer. *Nature* **606**,  
1124 984-991 (2022). <https://doi.org/10.1038/s41586-022-04738-6>
- 1125 27 Overall, A. *et al.* Comprehensive repertoire of the chromosomal alteration and mutational  
1126 signatures across 16 cancer types from 10,983 cancer patients. *medRxiv*,  
1127 2023.2006.2007.23290970 (2023). <https://doi.org/10.1101/2023.06.07.23290970>
- 1128 28 Nik-Zainal, S. *et al.* Landscape of somatic mutations in 560 breast cancer whole-genome  
1129 sequences. *Nature* **534**, 47-54 (2016). <https://doi.org/10.1038/nature17676>
- 1130 29 Degasperi, A. *et al.* A practical framework and online tool for mutational signature  
1131 analyses show inter-tissue variation and driver dependencies. *Nat Cancer* **1**, 249-263  
1132 (2020). <https://doi.org/10.1038/s43018-020-0027-5>
- 1133 30 Nguyen, L., W. M. Martens, J., Van Hoeck, A. & Cuppen, E. Pan-cancer landscape of  
1134 homologous recombination deficiency. *Nature Communications* **11**, 5584 (2020).  
1135 <https://doi.org/10.1038/s41467-020-19406-4>
- 1136 31 Davies, H. *et al.* HRDetect is a predictor of BRCA1 and BRCA2 deficiency based on  
1137 mutational signatures. *Nat Med* **23**, 517-525 (2017). <https://doi.org/10.1038/nm.4292>
- 1138 32 Poon, S. L. *et al.* Genome-wide mutational signatures of aristolochic acid and its  
1139 application as a screening tool. *Sci Transl Med* **5**, 197ra101 (2013).  
1140 <https://doi.org/10.1126/scitranslmed.3006086>



- 1141 33 Hoang, M. L. *et al.* Mutational signature of aristolochic acid exposure as revealed by  
1142 whole-exome sequencing. *Sci Transl Med* **5**, 197ra102 (2013).  
1143 <https://doi.org/10.1126/scitranslmed.3006200>
- 1144 34 Letouze, E. *et al.* Mutational signatures reveal the dynamic interplay of risk factors and  
1145 cellular processes during liver tumorigenesis. *Nat Commun* **8**, 1315 (2017).  
1146 <https://doi.org/10.1038/s41467-017-01358-x>
- 1147 35 Chen, Y.-J. *et al.* Proteogenomics of Non-smoking Lung Cancer in East Asia Delineates  
1148 Molecular Signatures of Pathogenesis and Progression. *Cell* **182**, 226-244.e217 (2020).  
1149 <https://doi.org/10.1016/j.cell.2020.06.012>
- 1150 36 Zhang, T. *et al.* APOBEC shapes tumor evolution and age at onset of lung cancer in  
1151 smokers. *bioRxiv*, 2024.2004.2002.587805 (2024).  
1152 <https://doi.org/10.1101/2024.04.02.587805>
- 1153 37 Morton, L. M. *et al.* Radiation-related genomic profile of papillary thyroid carcinoma  
1154 after the Chernobyl accident. *Science* **372**, eabg2538 (2021).  
1155 <https://doi.org/10.1126/science.abg2538>
- 1156 38 Jager, M. *et al.* Deficiency of nucleotide excision repair is associated with mutational  
1157 signature observed in cancer. *Genome Res* **29**, 1067-1077 (2019).  
1158 <https://doi.org/10.1101/gr.246223.118>
- 1159 39 Singh, V. K., Rastogi, A., Hu, X., Wang, Y. & De, S. Mutational signature SBS8  
1160 predominantly arises due to late replication errors in cancer. *Commun Biol* **3**, 421 (2020).  
1161 <https://doi.org/10.1038/s42003-020-01119-5>
- 1162 40 Caplin, M. E. *et al.* Pulmonary neuroendocrine (carcinoid) tumors: European  
1163 Neuroendocrine Tumor Society expert consensus and recommendations for best practice  
1164 for typical and atypical pulmonary carcinoids. *Ann Oncol* **26**, 1604-1620 (2015).  
1165 <https://doi.org/10.1093/annonc/mdv041>
- 1166 41 Alexandrov, L. B. *et al.* Signatures of mutational processes in human cancer. *Nature* **500**,  
1167 415-421 (2013). <https://doi.org/10.1038/nature12477>
- 1168 42 Lindeman, N. I. *et al.* Molecular testing guideline for selection of lung cancer patients for  
1169 EGFR and ALK tyrosine kinase inhibitors: guideline from the College of American  
1170 Pathologists, International Association for the Study of Lung Cancer, and Association for  
1171 Molecular Pathology. *J Thorac Oncol* **8**, 823-859 (2013).  
1172 <https://doi.org/10.1097/JTO.0b013e318290868f>
- 1173 43 Lawson, A. R. J. *et al.* Extensive heterogeneity in somatic mutation and selection in the  
1174 human bladder. *Science* **370**, 75-82 (2020). <https://doi.org/10.1126/science.aba8347>
- 1175 44 Degasperi, A. *et al.* Substitution mutational signatures in whole-genome-sequenced  
1176 cancers in the UK population. *Science* **376**, abl9283 (2022).  
1177 <https://doi.org/10.1126/science.abl9283>
- 1178 45 Otlu, B. *et al.* Topography of mutational signatures in human cancer. *Cell Rep* **42**,  
1179 112930 (2023). <https://doi.org/10.1016/j.celrep.2023.112930>
- 1180 46 Jamal-Hanjani, M. *et al.* Tracking the Evolution of Non-Small-Cell Lung Cancer. *New*  
1181 *England Journal of Medicine* **376**, 2109-2121 (2017).  
1182 <https://doi.org/10.1056/NEJMoa1616288>
- 1183 47 Zhang, T. *et al.* Distinct Genomic Landscape of Lung Adenocarcinoma from Household  
1184 Use of Smoky Coal. *American Journal of Respiratory and Critical Care Medicine* **208**,  
1185 733-736 (2023). <https://doi.org/10.1164/rccm.202302-0340LE>

- 1186 48 Hill, W. *et al.* Lung adenocarcinoma promotion by air pollutants. *Nature* **616**, 159-167  
1187 (2023). <https://doi.org/10.1038/s41586-023-05874-3>
- 1188 49 van Donkelaar, A. *et al.* Monthly Global Estimates of Fine Particulate Matter and Their  
1189 Uncertainty. *Environmental Science & Technology* **55**, 15287-15300 (2021).  
1190 <https://doi.org/10.1021/acs.est.1c05309>
- 1191 50 Mochizuki, A. *et al.* Passive smoking-induced mutagenesis as a promoter of lung  
1192 carcinogenesis. *J Thorac Oncol*, S1556-0864(1524)00074-00071 (2024).  
1193 <https://doi.org/10.1016/j.jtho.2024.02.006>
- 1194 51 Yu, X. J. *et al.* Characterization of Somatic Mutations in Air Pollution-Related Lung  
1195 Cancer. *EBioMedicine* **2**, 583-590 (2015). <https://doi.org/10.1016/j.ebiom.2015.04.003>
- 1196 52 Chan, W.-H. *et al.* Verifying the accuracy of self-reported smoking behavior in female  
1197 volunteer soldiers. *Scientific Reports* **13**, 3438 (2023). <https://doi.org/10.1038/s41598-023-29699-2>
- 1198
- 1199 53 Landi, M. T. *et al.* Environment And Genetics in Lung cancer Etiology (EAGLE) study:  
1200 an integrative population-based case-control study of lung cancer. *BMC Public Health* **8**,  
1201 203 (2008). <https://doi.org/10.1186/1471-2458-8-203>
- 1202 54 Bergmann, E. A., Chen, B. J., Arora, K., Vacic, V. & Zody, M. C. Conpair: concordance  
1203 and contamination estimator for matched tumor-normal pairs. *Bioinformatics* **32**, 3196-  
1204 3198 (2016). <https://doi.org/10.1093/bioinformatics/btw389>
- 1205 55 Pedersen, B. S. *et al.* Somalier: rapid relatedness estimation for cancer and germline  
1206 studies using efficient genome sketches. *Genome Medicine* **12**, 62 (2020).  
1207 <https://doi.org/10.1186/s13073-020-00761-2>
- 1208 56 Nik-Zainal, S. *et al.* The life history of 21 breast cancers. *Cell* **149**, 994-1007 (2012).  
1209 <https://doi.org/10.1016/j.cell.2012.04.023>
- 1210 57 Boot, A. *et al.* In-depth characterization of the cisplatin mutational signature in human  
1211 cell lines and in esophageal and liver tumors. *Genome Res* **28**, 654-665 (2018).  
1212 <https://doi.org/10.1101/gr.230219.117>
- 1213 58 Dentre, S. C. *et al.* Characterizing genetic intra-tumor heterogeneity across 2,658 human  
1214 cancer genomes. *Cell* **184**, 2239-2254 (2021). <https://doi.org/10.1016/j.cell.2021.03.009>
- 1215 59 Imielinski, M. *et al.* Mapping the hallmarks of lung adenocarcinoma with massively  
1216 parallel sequencing. *Cell* **150**, 1107-1120 (2012).  
1217 <https://doi.org/10.1016/j.cell.2012.08.029>
- 1218 60 Lee, J. K. *et al.* Clonal History and Genetic Predictors of Transformation Into Small-Cell  
1219 Carcinomas From Lung Adenocarcinomas. *J Clin Oncol* **35**, 3065-3074 (2017).  
1220 <https://doi.org/10.1200/JCO.2016.71.9096>
- 1221 61 Cancer Genome Atlas Research, N. Comprehensive molecular profiling of lung  
1222 adenocarcinoma. *Nature* **511**, 543-550 (2014). <https://doi.org/10.1038/nature13385>
- 1223 62 Carrot-Zhang, J. *et al.* Whole-genome characterization of lung adenocarcinomas lacking  
1224 the RTK/RAS/RAF pathway. *Cell Rep* **34**, 108707 (2021).  
1225 <https://doi.org/10.1016/j.celrep.2021.108707>
- 1226 63 Sadedin, S. P. & Oshlack, A. Bazam: a rapid method for read extraction and realignment  
1227 of high-throughput sequencing data. *Genome Biol* **20**, 78 (2019).  
1228 <https://doi.org/10.1186/s13059-019-1688-1>
- 1229 64 Cibulskis, K. *et al.* Sensitive detection of somatic point mutations in impure and  
1230 heterogeneous cancer samples. *Nat Biotechnol* **31**, 213-219 (2013).  
1231 <https://doi.org/10.1038/nbt.2514>

- 1232 65 Kim, S. *et al.* Strelka2: fast and accurate calling of germline and somatic variants. *Nat*  
1233 *Methods* **15**, 591-594 (2018). <https://doi.org/10.1038/s41592-018-0051-x>
- 1234 66 Freed, D., Pan, R. & Aldana, R. TNscope: Accurate Detection of Somatic Mutations with  
1235 Haplotype-based Variant Candidate Detection and Machine Learning Filtering. *bioRxiv*,  
1236 250647 (2018). <https://doi.org/10.1101/250647>
- 1237 67 Karczewski, K. J. *et al.* The mutational constraint spectrum quantified from variation in  
1238 141,456 humans. *Nature* **581**, 434-443 (2020). [https://doi.org/10.1038/s41586-020-2308-](https://doi.org/10.1038/s41586-020-2308-7)  
1239 [7](https://doi.org/10.1038/s41586-020-2308-7)
- 1240 68 Ramos, A. H. *et al.* Oncotator: cancer variant annotation tool. *Hum Mutat* **36**, E2423-  
1241 2429 (2015). <https://doi.org/10.1002/humu.22771>
- 1242 69 Hasan, M. S., Wu, X., Watson, L. T. & Zhang, L. UPS-indel: a Universal Positioning  
1243 System for Indels. *Sci Rep* **7**, 14106 (2017). <https://doi.org/10.1038/s41598-017-14400-1>
- 1244 70 Jun, G. *et al.* Detecting and estimating contamination of human DNA samples in  
1245 sequencing and array-based genotype data. *Am J Hum Genet* **91**, 839-848 (2012).  
1246 <https://doi.org/10.1016/j.ajhg.2012.09.004>
- 1247 71 Martinez-Jimenez, F. *et al.* A compendium of mutational cancer driver genes. *Nat Rev*  
1248 *Cancer* **20**, 555-572 (2020). <https://doi.org/10.1038/s41568-020-0290-x>
- 1249 72 Martincorena, I. *et al.* Universal Patterns of Selection in Cancer and Somatic Tissues.  
1250 *Cell* **171**, 1029-1041 (2017). <https://doi.org/10.1016/j.cell.2017.09.042>
- 1251 73 Sondka, Z. *et al.* The COSMIC Cancer Gene Census: describing genetic dysfunction  
1252 across all human cancers. *Nat Rev Cancer* **18**, 696-705 (2018).  
1253 <https://doi.org/10.1038/s41568-018-0060-1>
- 1254 74 Muiños, F., Martinez-Jimenez, F., Pich, O., Gonzalez-Perez, A. & Lopez-Bigas, N. In  
1255 silico saturation mutagenesis of cancer genes. *Nature* **596**, 428-432 (2021).  
1256 <https://doi.org/10.1038/s41586-021-03771-1>
- 1257 75 Chakravarty, D. *et al.* OncoKB: A Precision Oncology Knowledge Base. *JCO Precis*  
1258 *Oncol* **2017**, 1-16 (2017). <https://doi.org/10.1200/PO.17.00011>
- 1259 76 Bailey, M. H. *et al.* Comprehensive Characterization of Cancer Driver Genes and  
1260 Mutations. *Cell* **173**, 371-385 e318 (2018). <https://doi.org/10.1016/j.cell.2018.02.060>
- 1261 77 Cheng, J. *et al.* Accurate proteome-wide missense variant effect prediction with  
1262 AlphaMissense. *Science* **381**, eadg7492 (2023). <https://doi.org/10.1126/science.adg7492>
- 1263 78 Yuan, K., Macintyre, G., Liu, W. & Markowitz, F. Ccube: A fast and robust method for  
1264 estimating cancer cell fractions. *bioRxiv*, 484402 (2018). <https://doi.org/10.1101/484402>
- 1265 79 Mermel, C. H. *et al.* GISTIC2.0 facilitates sensitive and confident localization of the  
1266 targets of focal somatic copy-number alteration in human cancers. *Genome Biol* **12**, R41  
1267 (2011). <https://doi.org/10.1186/gb-2011-12-4-r41>
- 1268 80 Yang, L. *et al.* Diverse mechanisms of somatic structural variations in human cancer  
1269 genomes. *Cell* **153**, 919-929 (2013). <https://doi.org/10.1016/j.cell.2013.04.010>
- 1270 81 Chen, X. *et al.* Manta: rapid detection of structural variants and indels for germline and  
1271 cancer sequencing applications. *Bioinformatics* **32**, 1220-1222 (2016).  
1272 <https://doi.org/10.1093/bioinformatics/btv710>
- 1273 82 Ding, Z. *et al.* Estimating telomere length from whole genome sequence data. *Nucleic*  
1274 *Acids Res* **42**, e75 (2014). <https://doi.org/10.1093/nar/gku181>
- 1275 83 Alexandrov, L. B., Nik-Zainal, S., Wedge, D. C., Campbell, P. J. & Stratton, M. R.  
1276 Deciphering signatures of mutational processes operative in human cancer. *Cell Rep* **3**,  
1277 246-259 (2013). <https://doi.org/10.1016/j.celrep.2012.12.008>

1278 84 Bergstrom, E. N. *et al.* SigProfilerMatrixGenerator: a tool for visualizing and exploring  
1279 patterns of small mutational events. *BMC Genomics* **20**, 685 (2019).  
1280 <https://doi.org/10.1186/s12864-019-6041-2>  
1281 85 Diaz-Gay, M. *et al.* Assigning mutational signatures to individual samples and individual  
1282 somatic mutations with SigProfilerAssignment. *Bioinformatics* **39**, btad756 (2023).  
1283 <https://doi.org/10.1093/bioinformatics/btad756>  
1284 86 Otlu, B. & Alexandrov, L. B. Evaluating topography of mutational signatures with  
1285 SigProfilerTopography. *bioRxiv*, 2024.2001.2008.574683 (2024).  
1286 <https://doi.org/10.1101/2024.01.08.574683>  
1287 87 Benjamini, Y. & Hochberg, Y. Controlling the False Discovery Rate - a Practical and  
1288 Powerful Approach to Multiple Testing. *Journal of the Royal Statistical Society Series B-*  
1289 *Statistical Methodology* **57**, 289-300 (1995). [https://doi.org/10.1111/j.2517-](https://doi.org/10.1111/j.2517-6161.1995.tb02031.x)  
1290 [6161.1995.tb02031.x](https://doi.org/10.1111/j.2517-6161.1995.tb02031.x)  
1291

**Fig. 1**

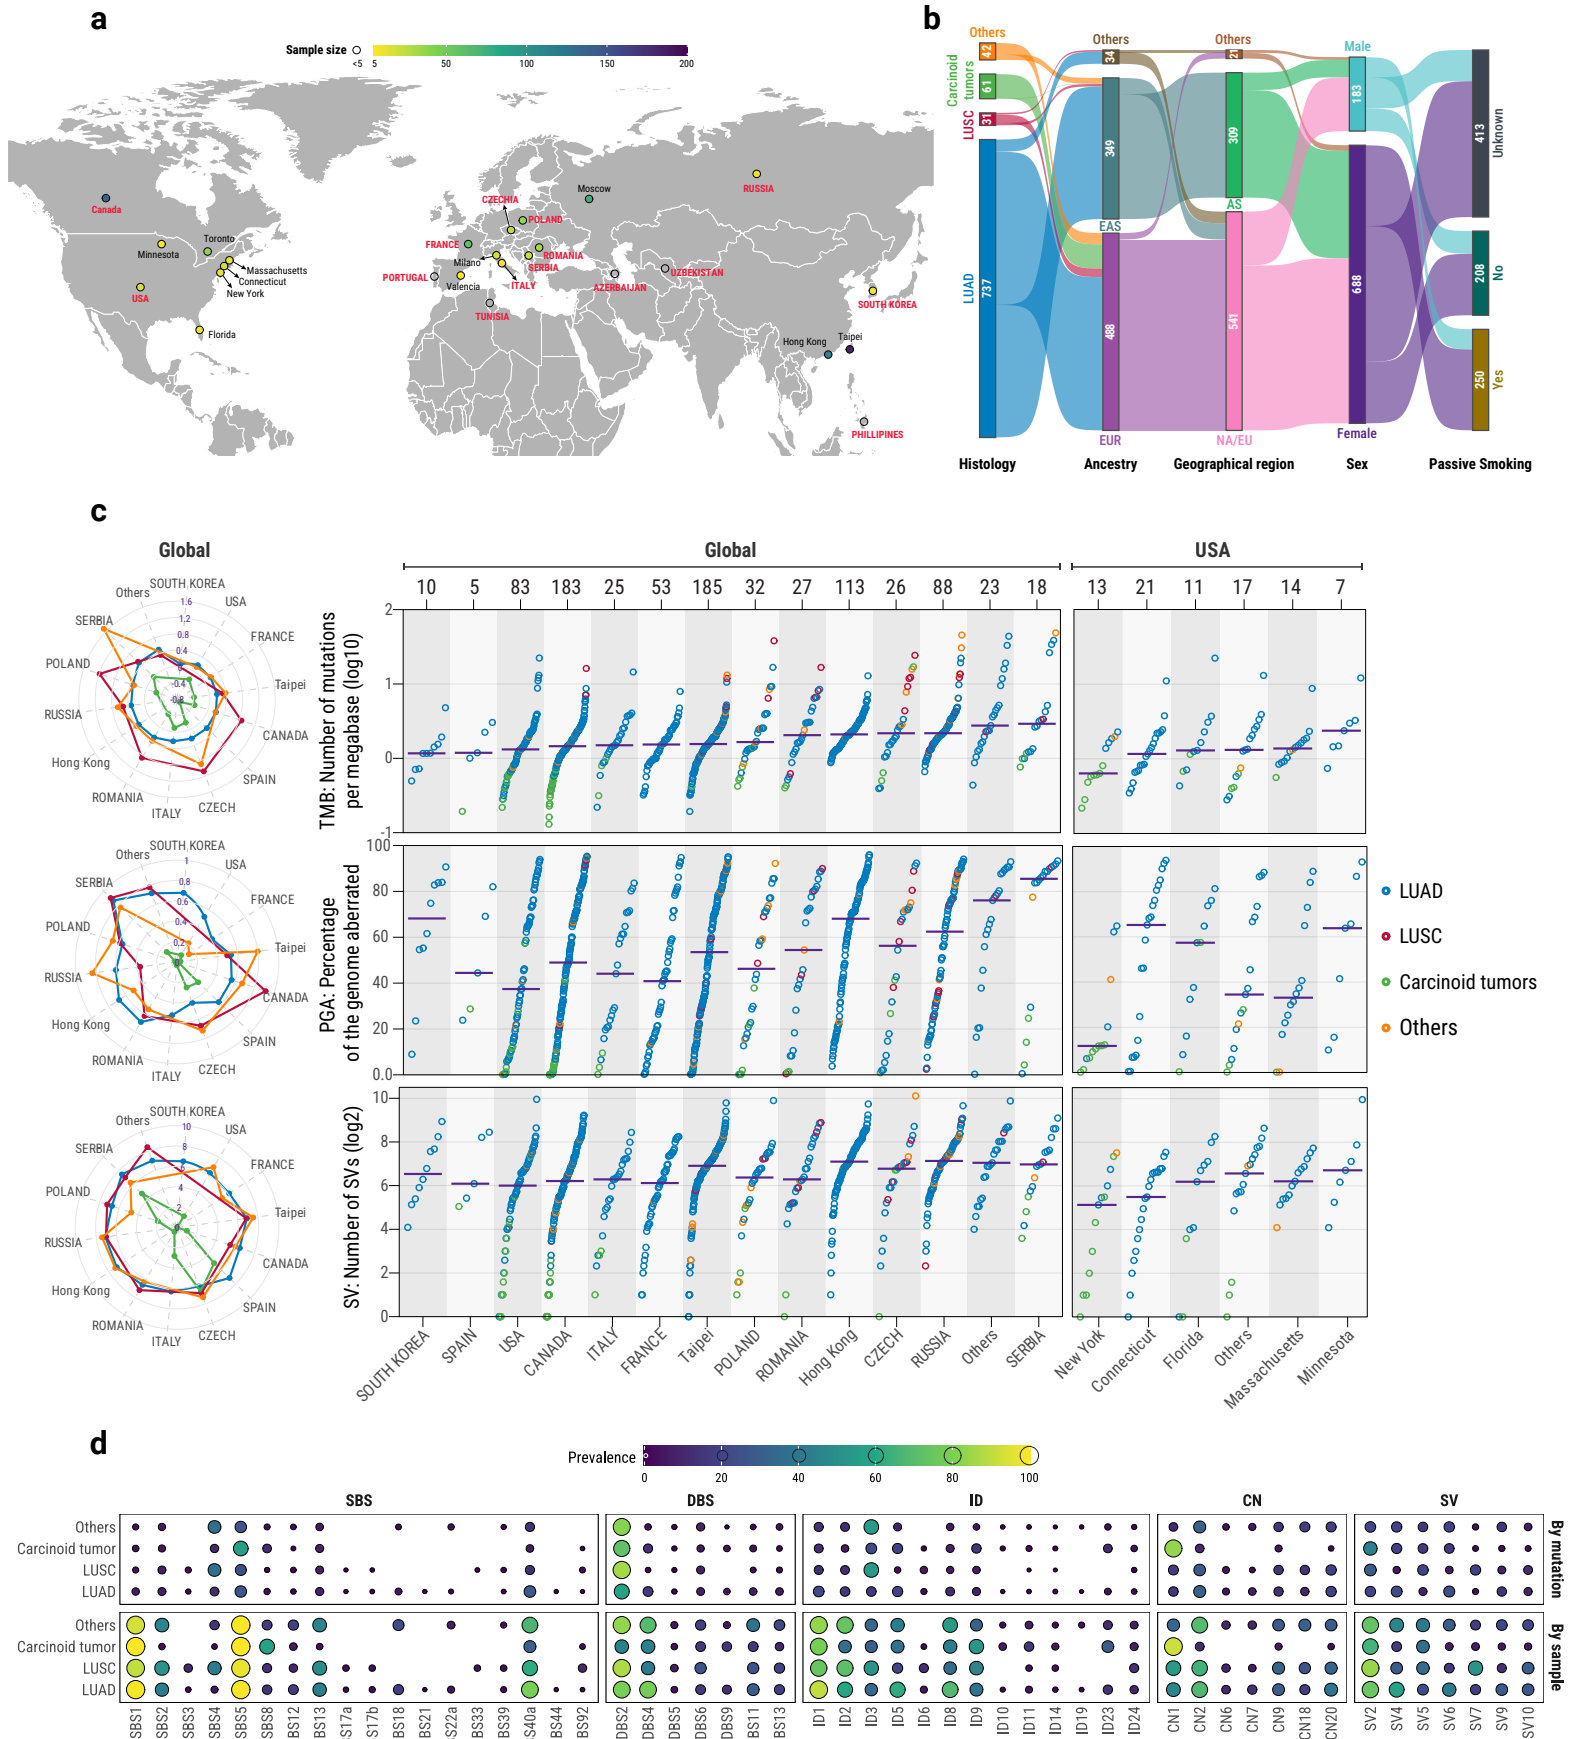



**Fig. 2**

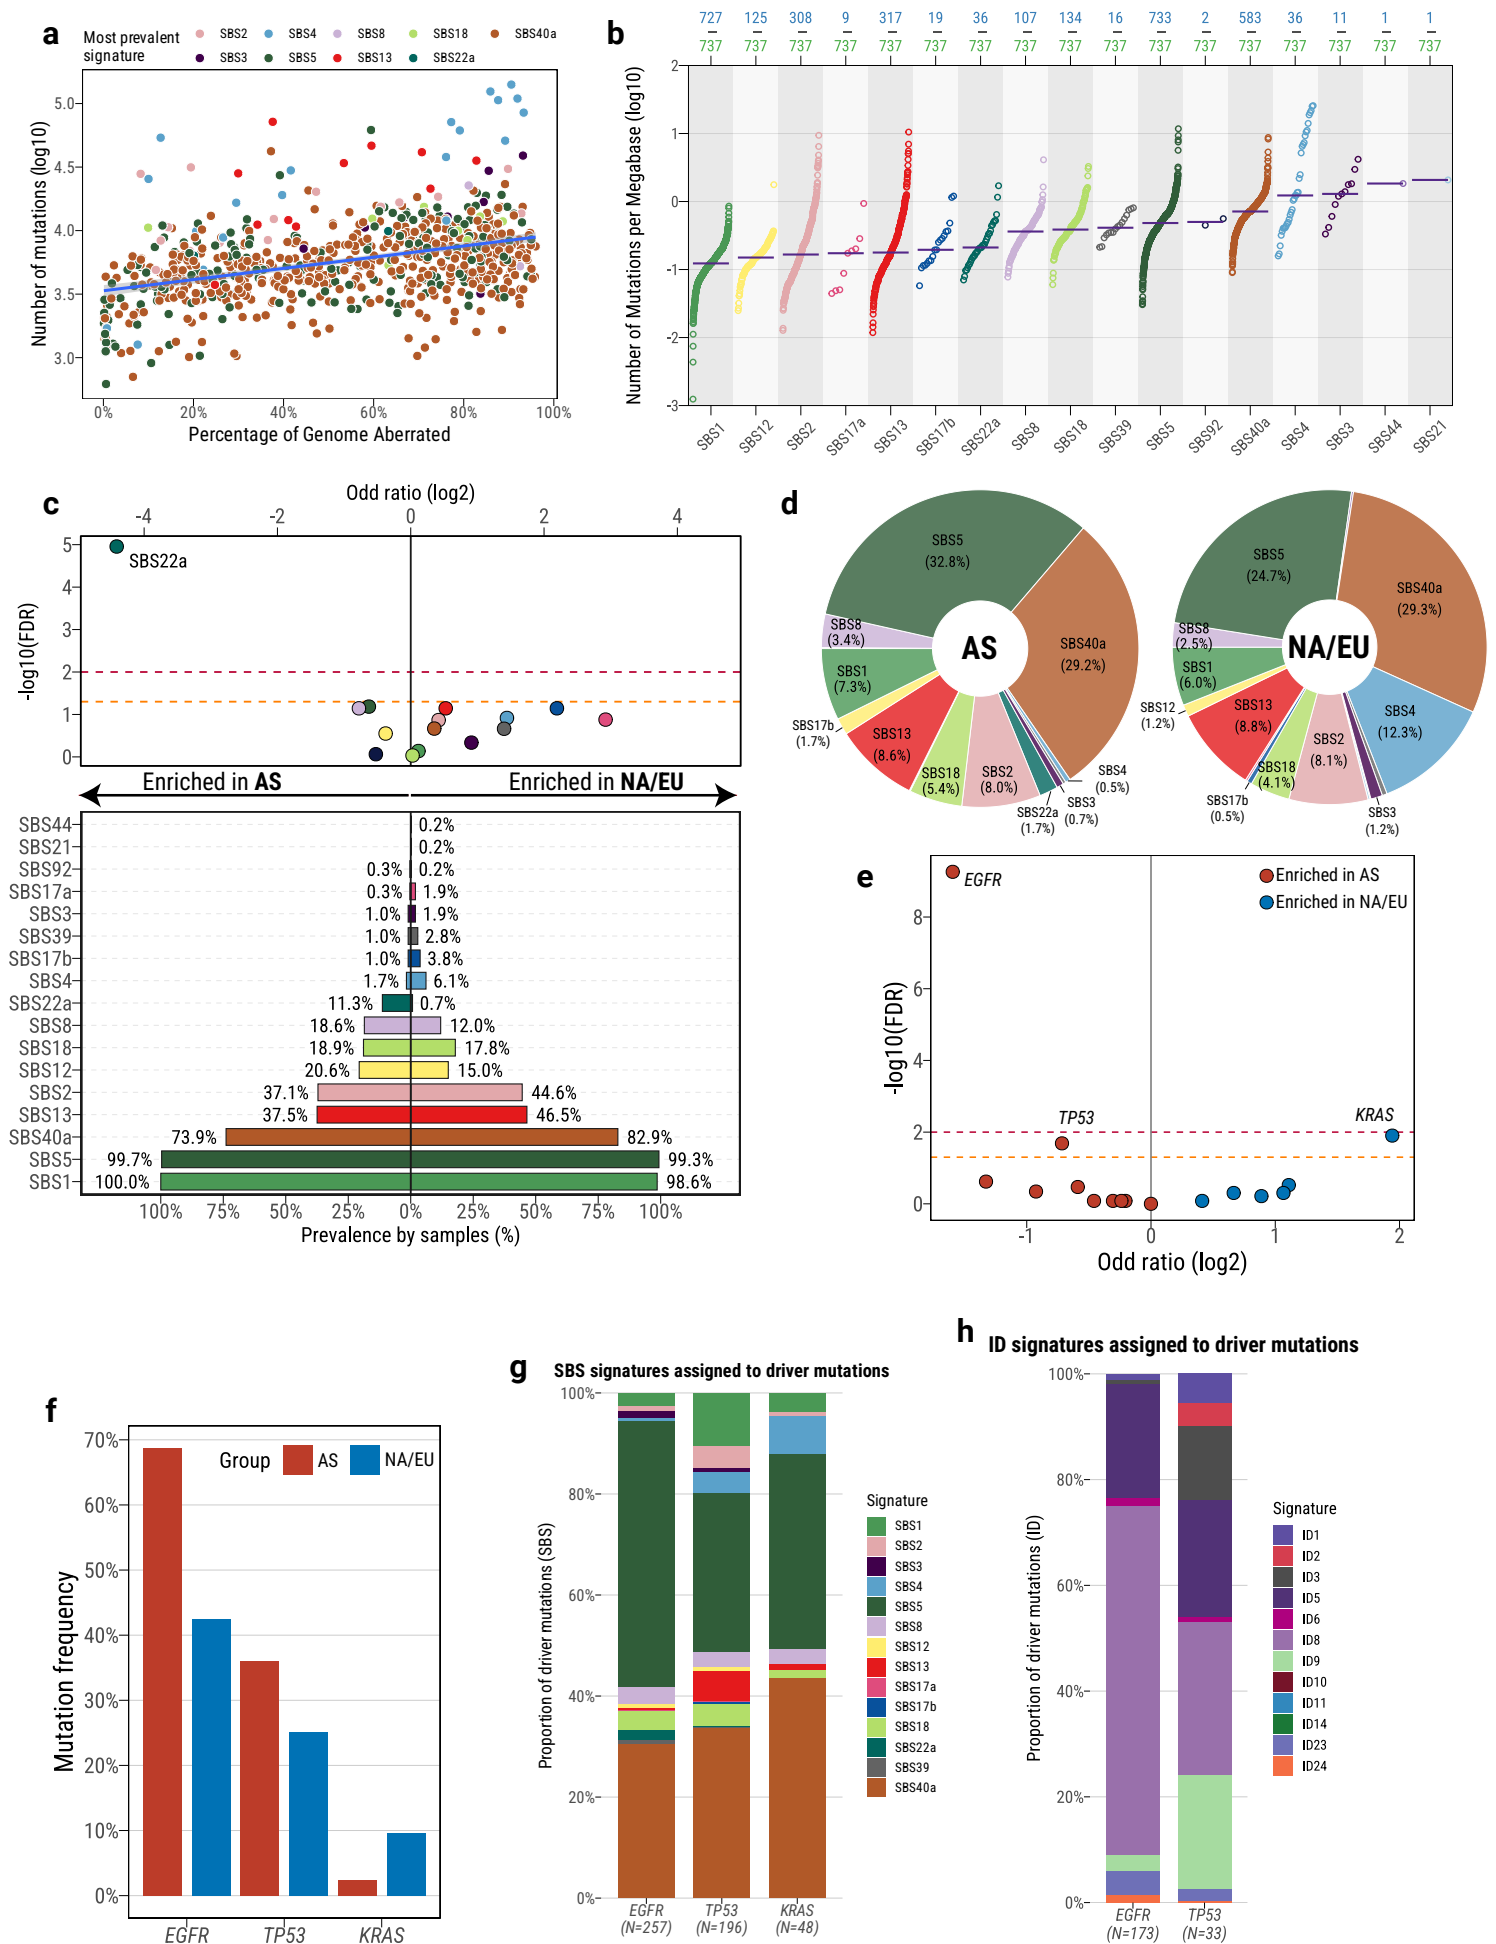

**Fig. 3**

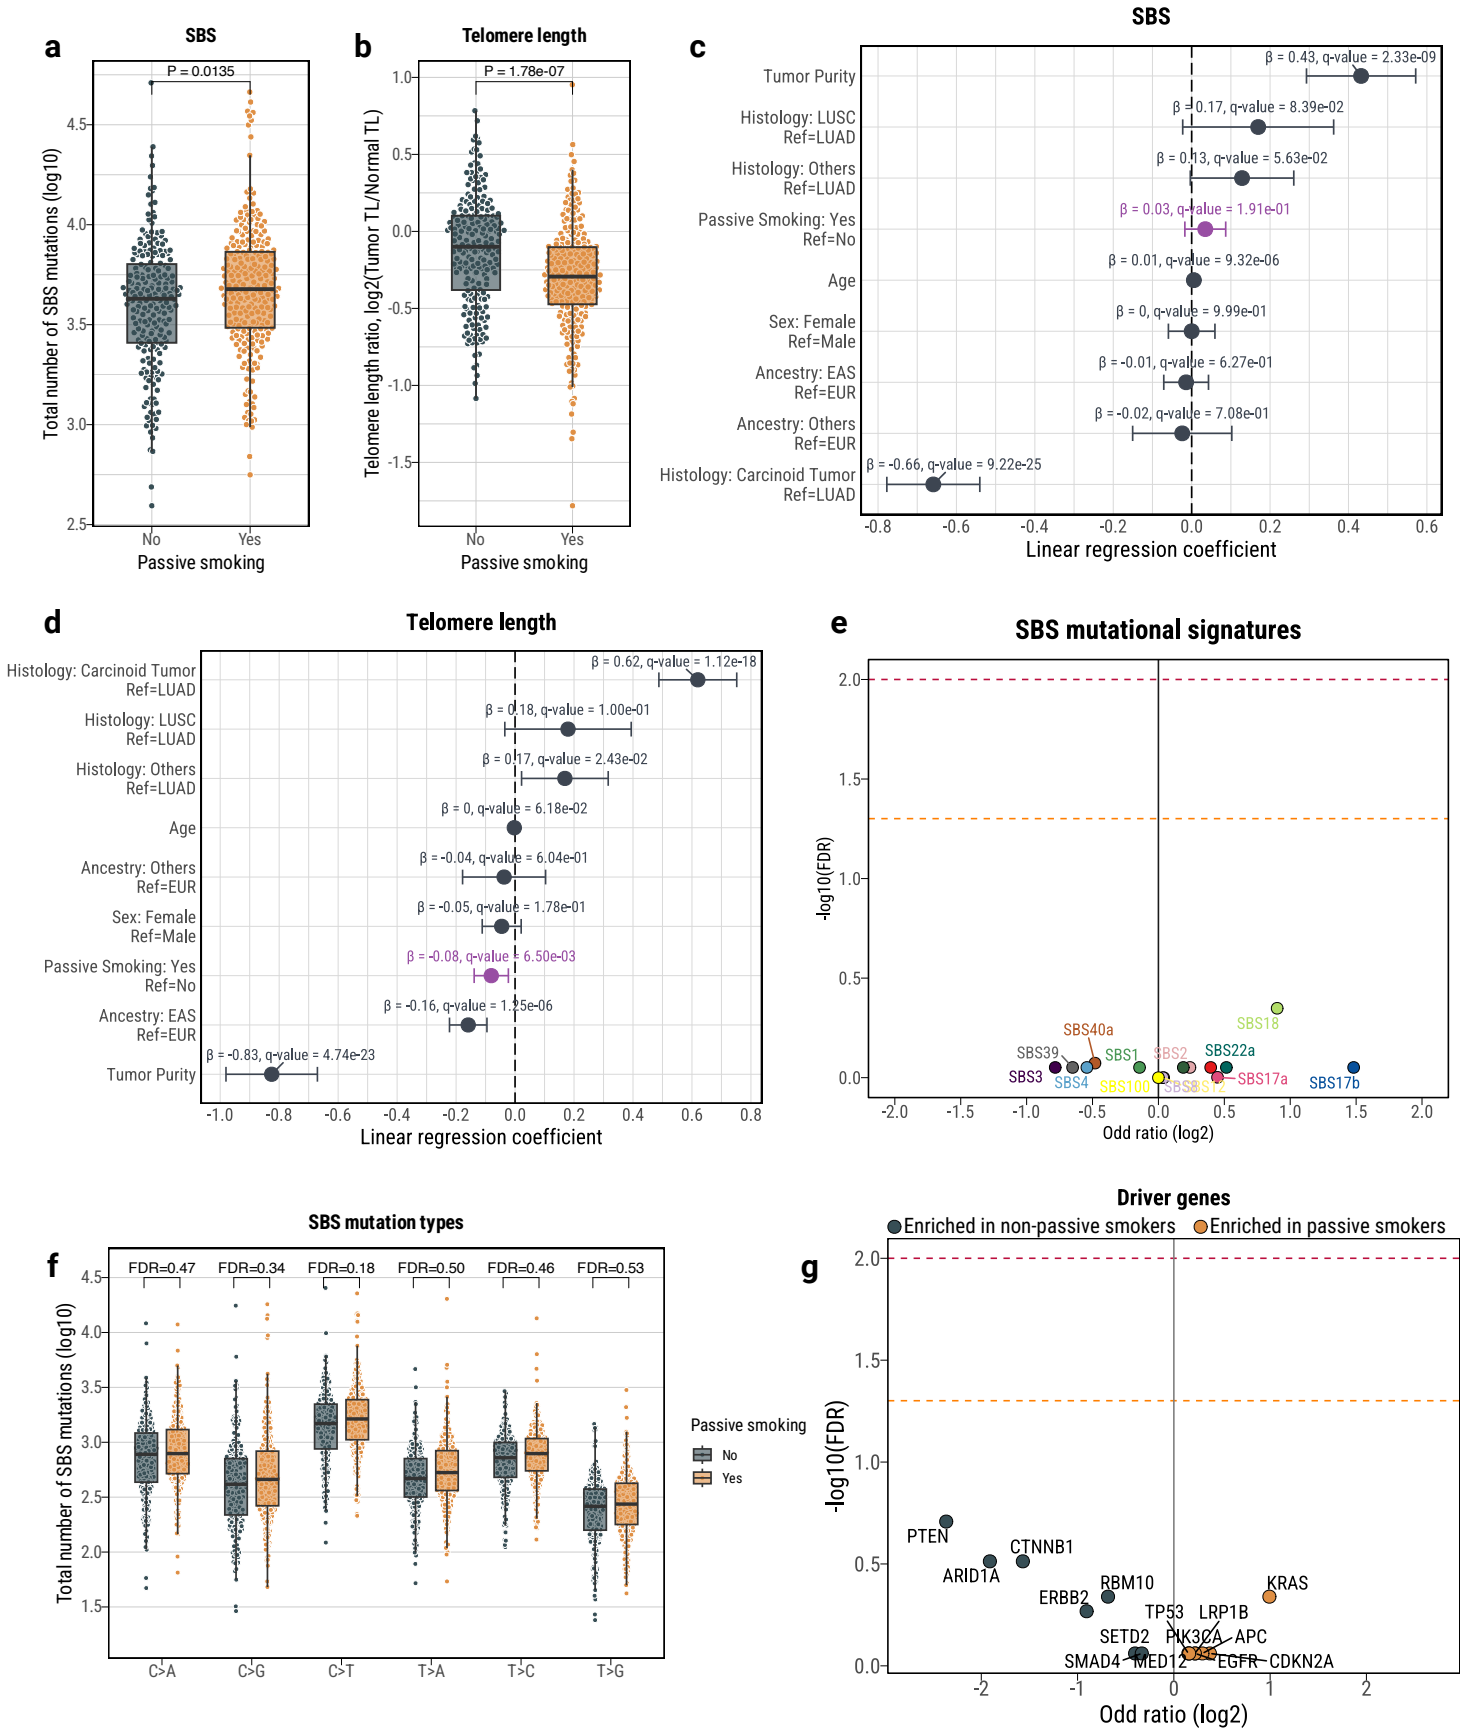

**Fig. 4**

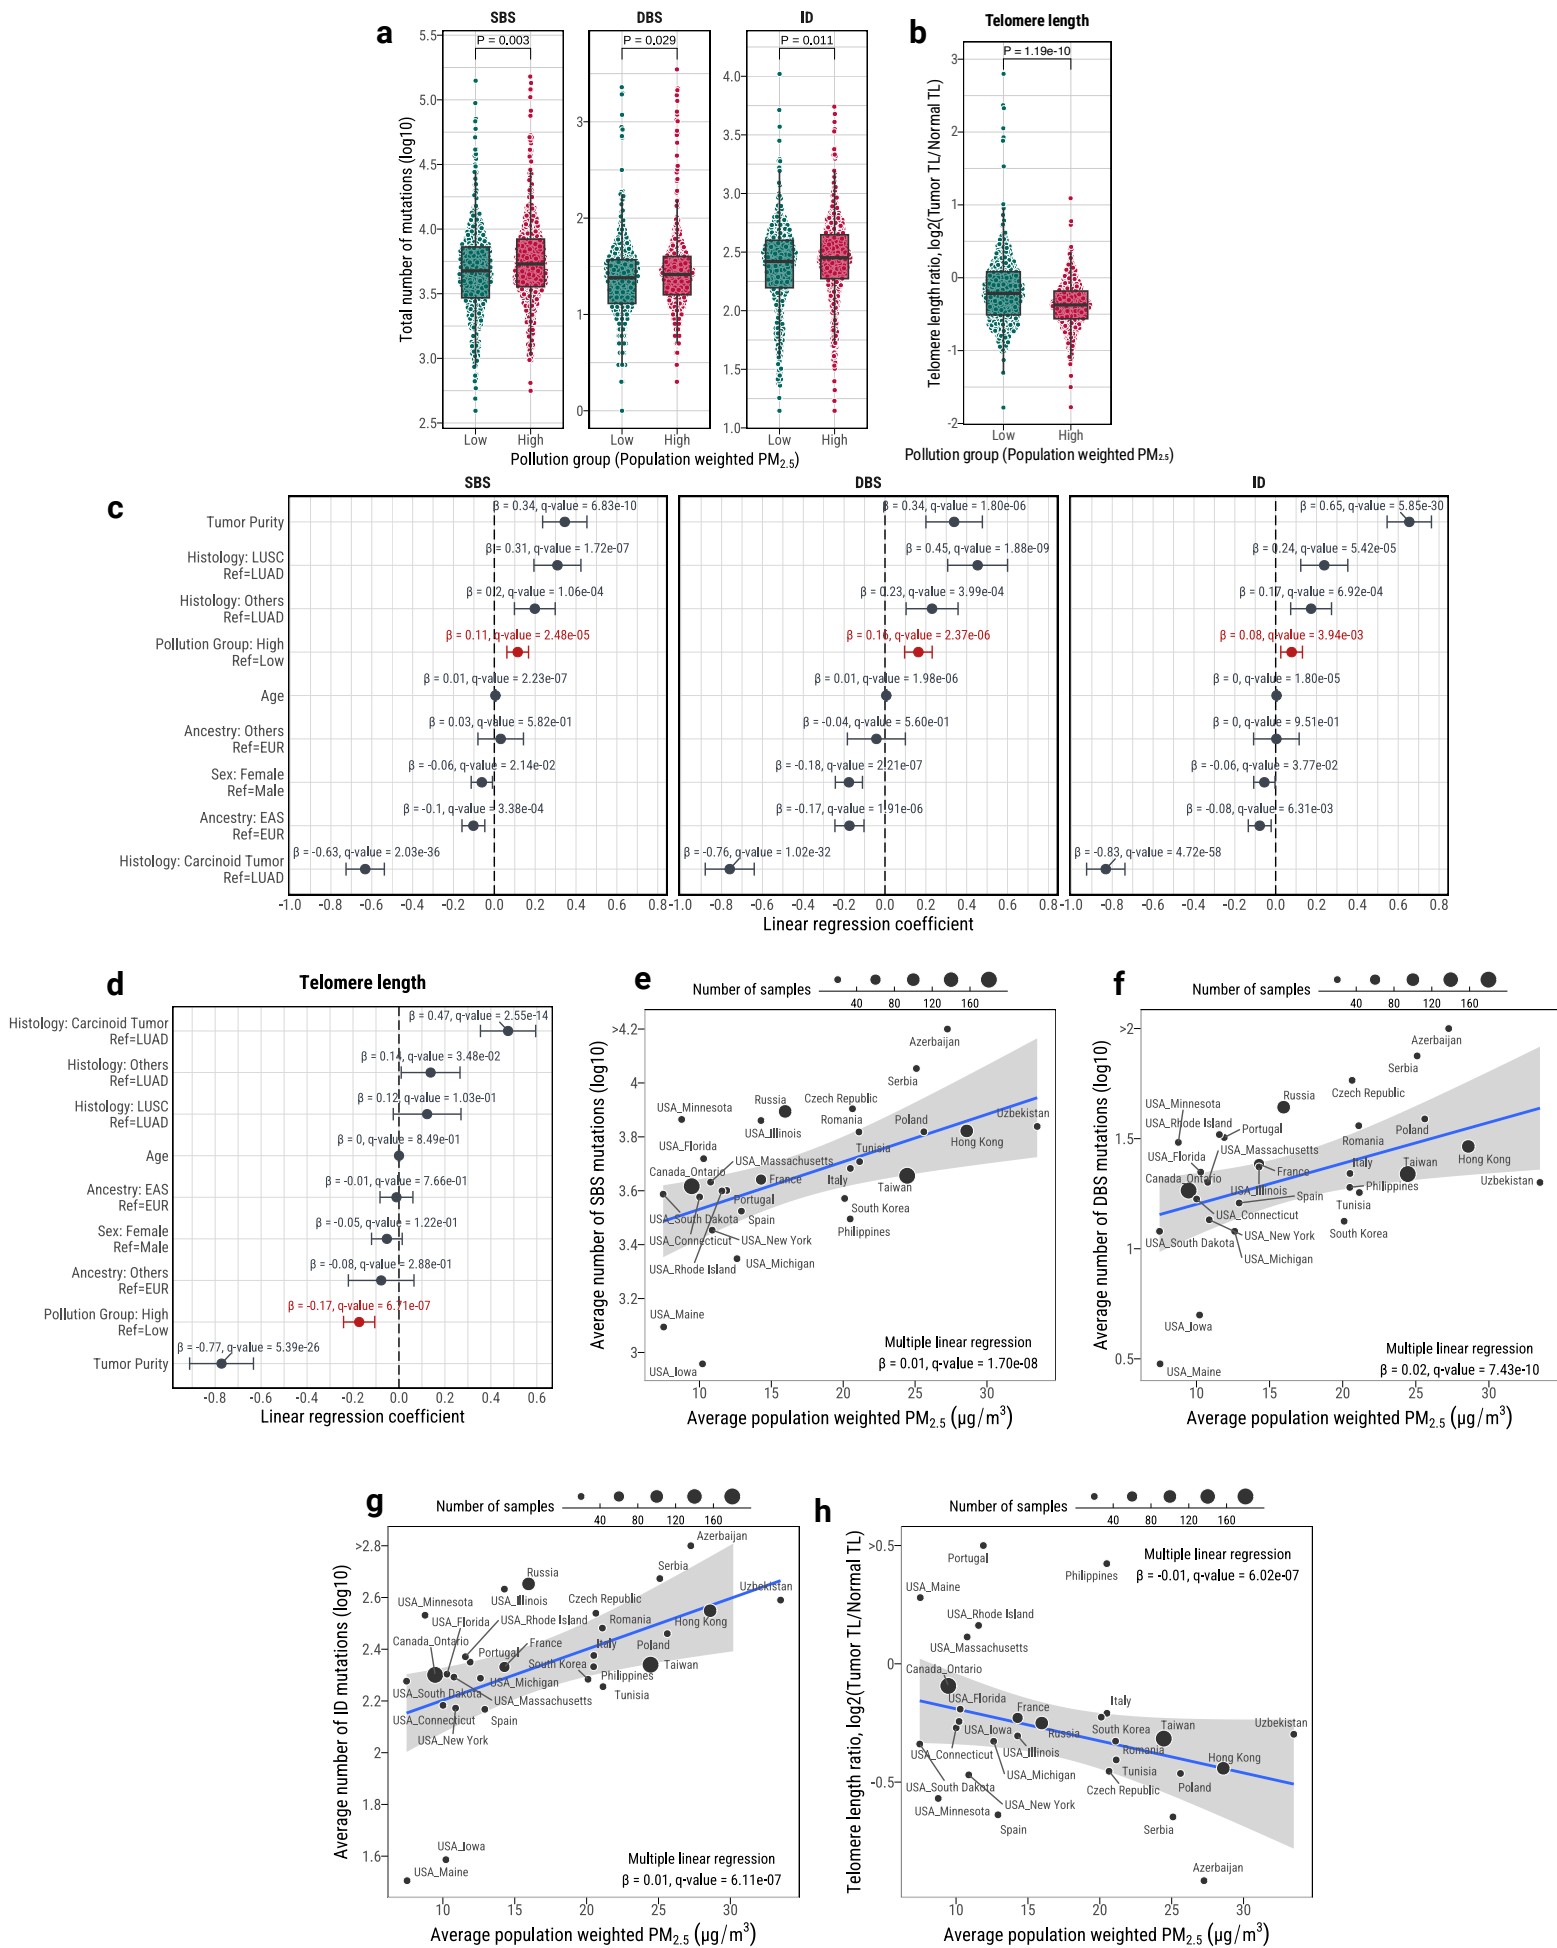



**Fig. 5**

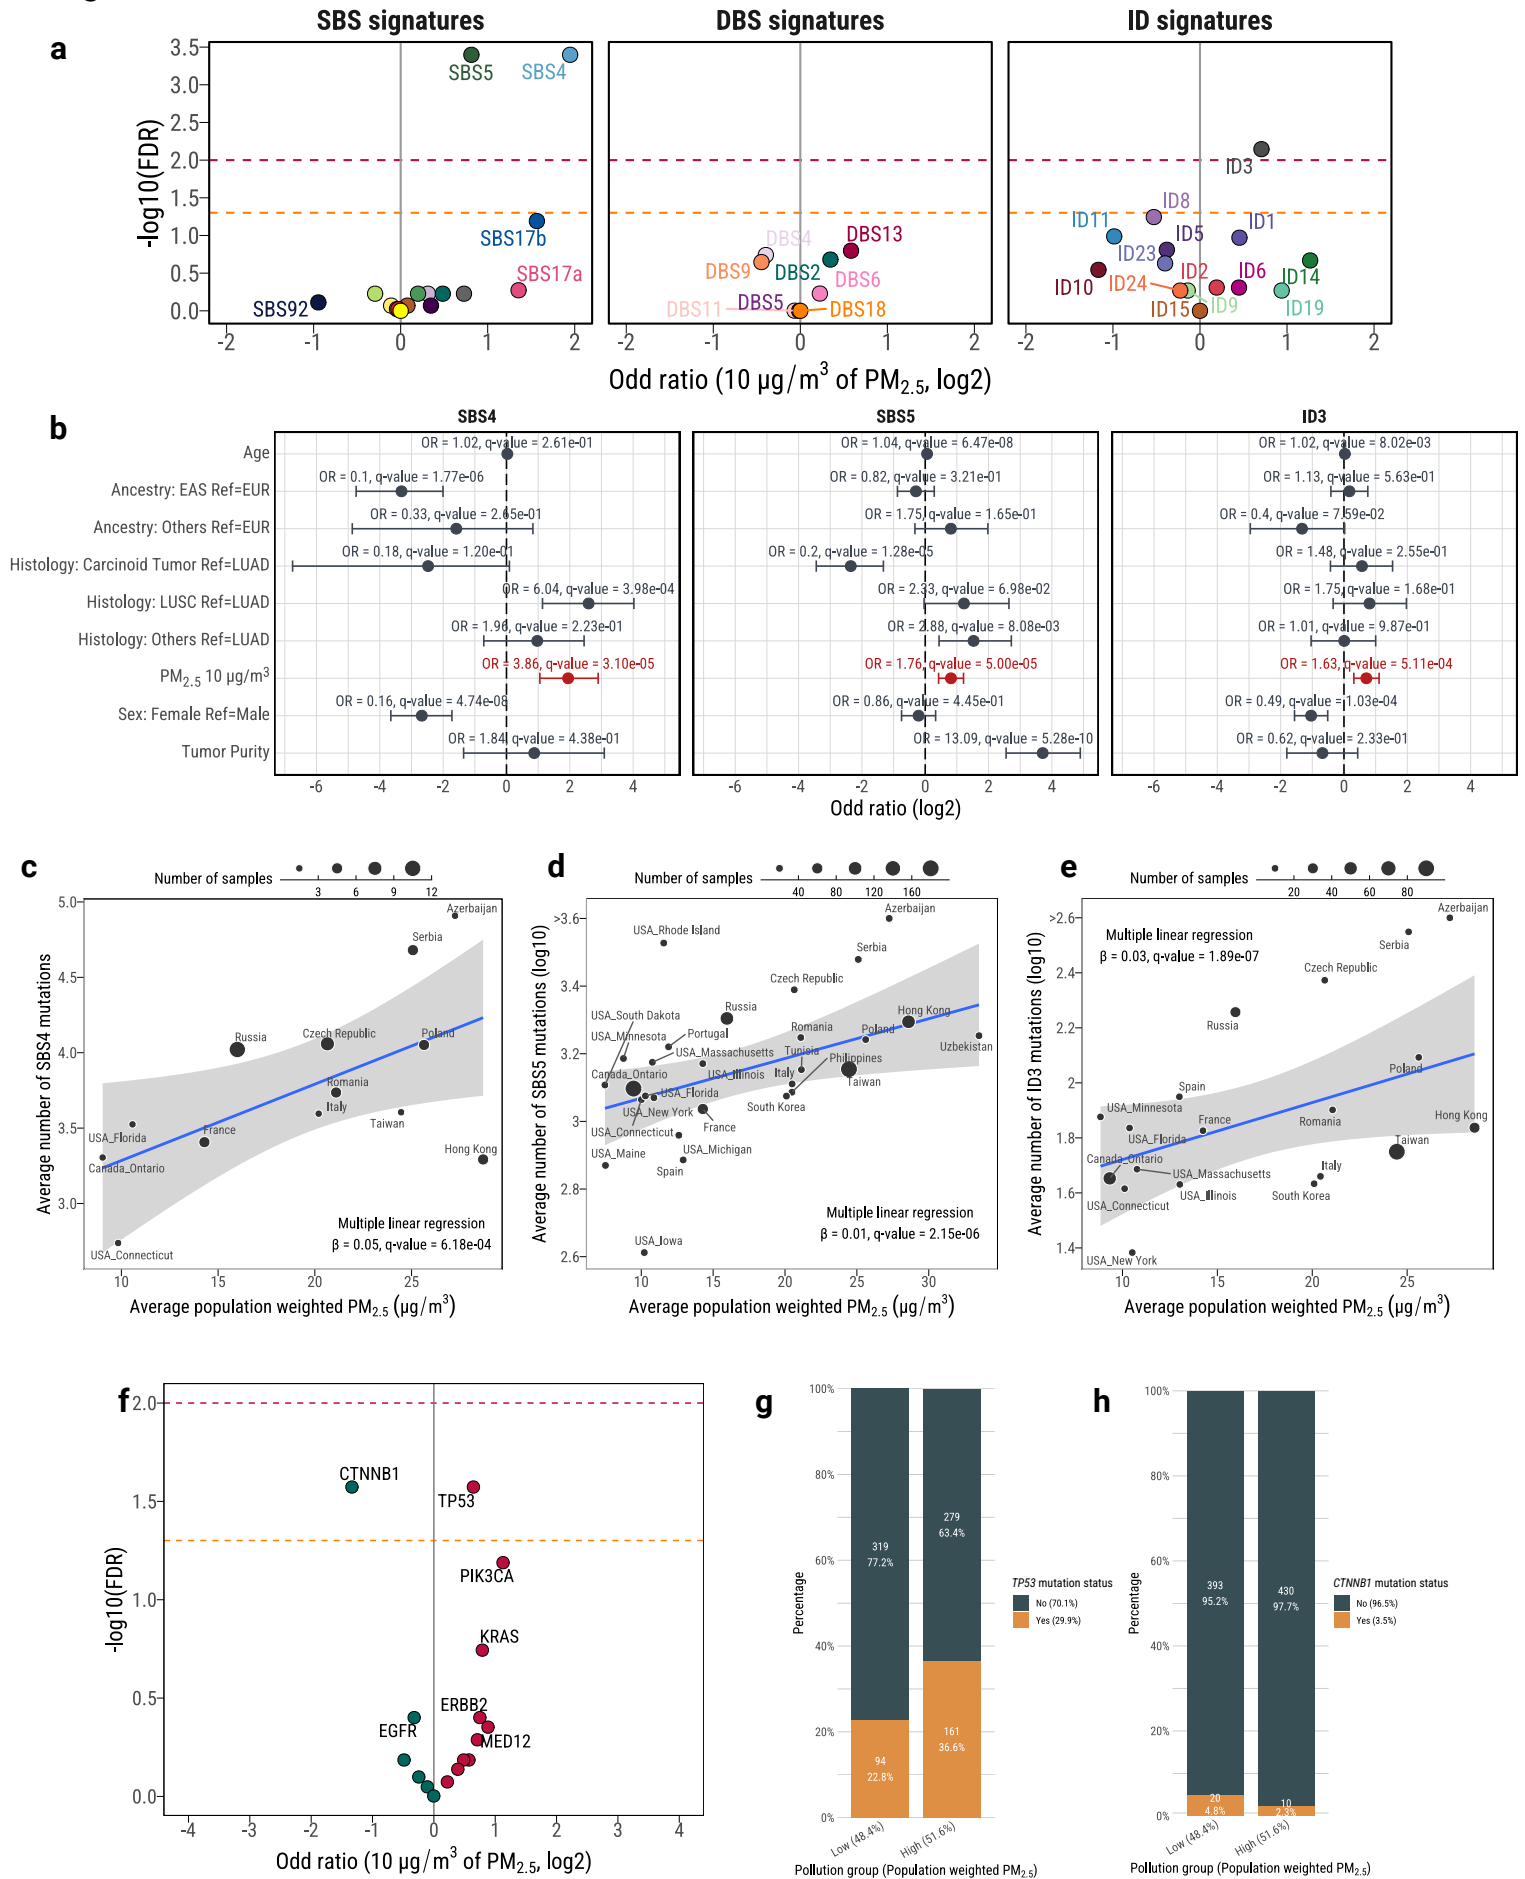

Source: https://www.medrxiv.org/content/10.1101/2024.05.15.24307318v1.full.pdf
