# Supplementary material for: The mutagenic forces shaping the genomic landscape of lung cancer in never smokers
Source: PubMed Central journal article supplement (PMC11118654; doi:10.1101/2024.05.15.24307318), 2024-05-17

# Extended Data Fig. 1

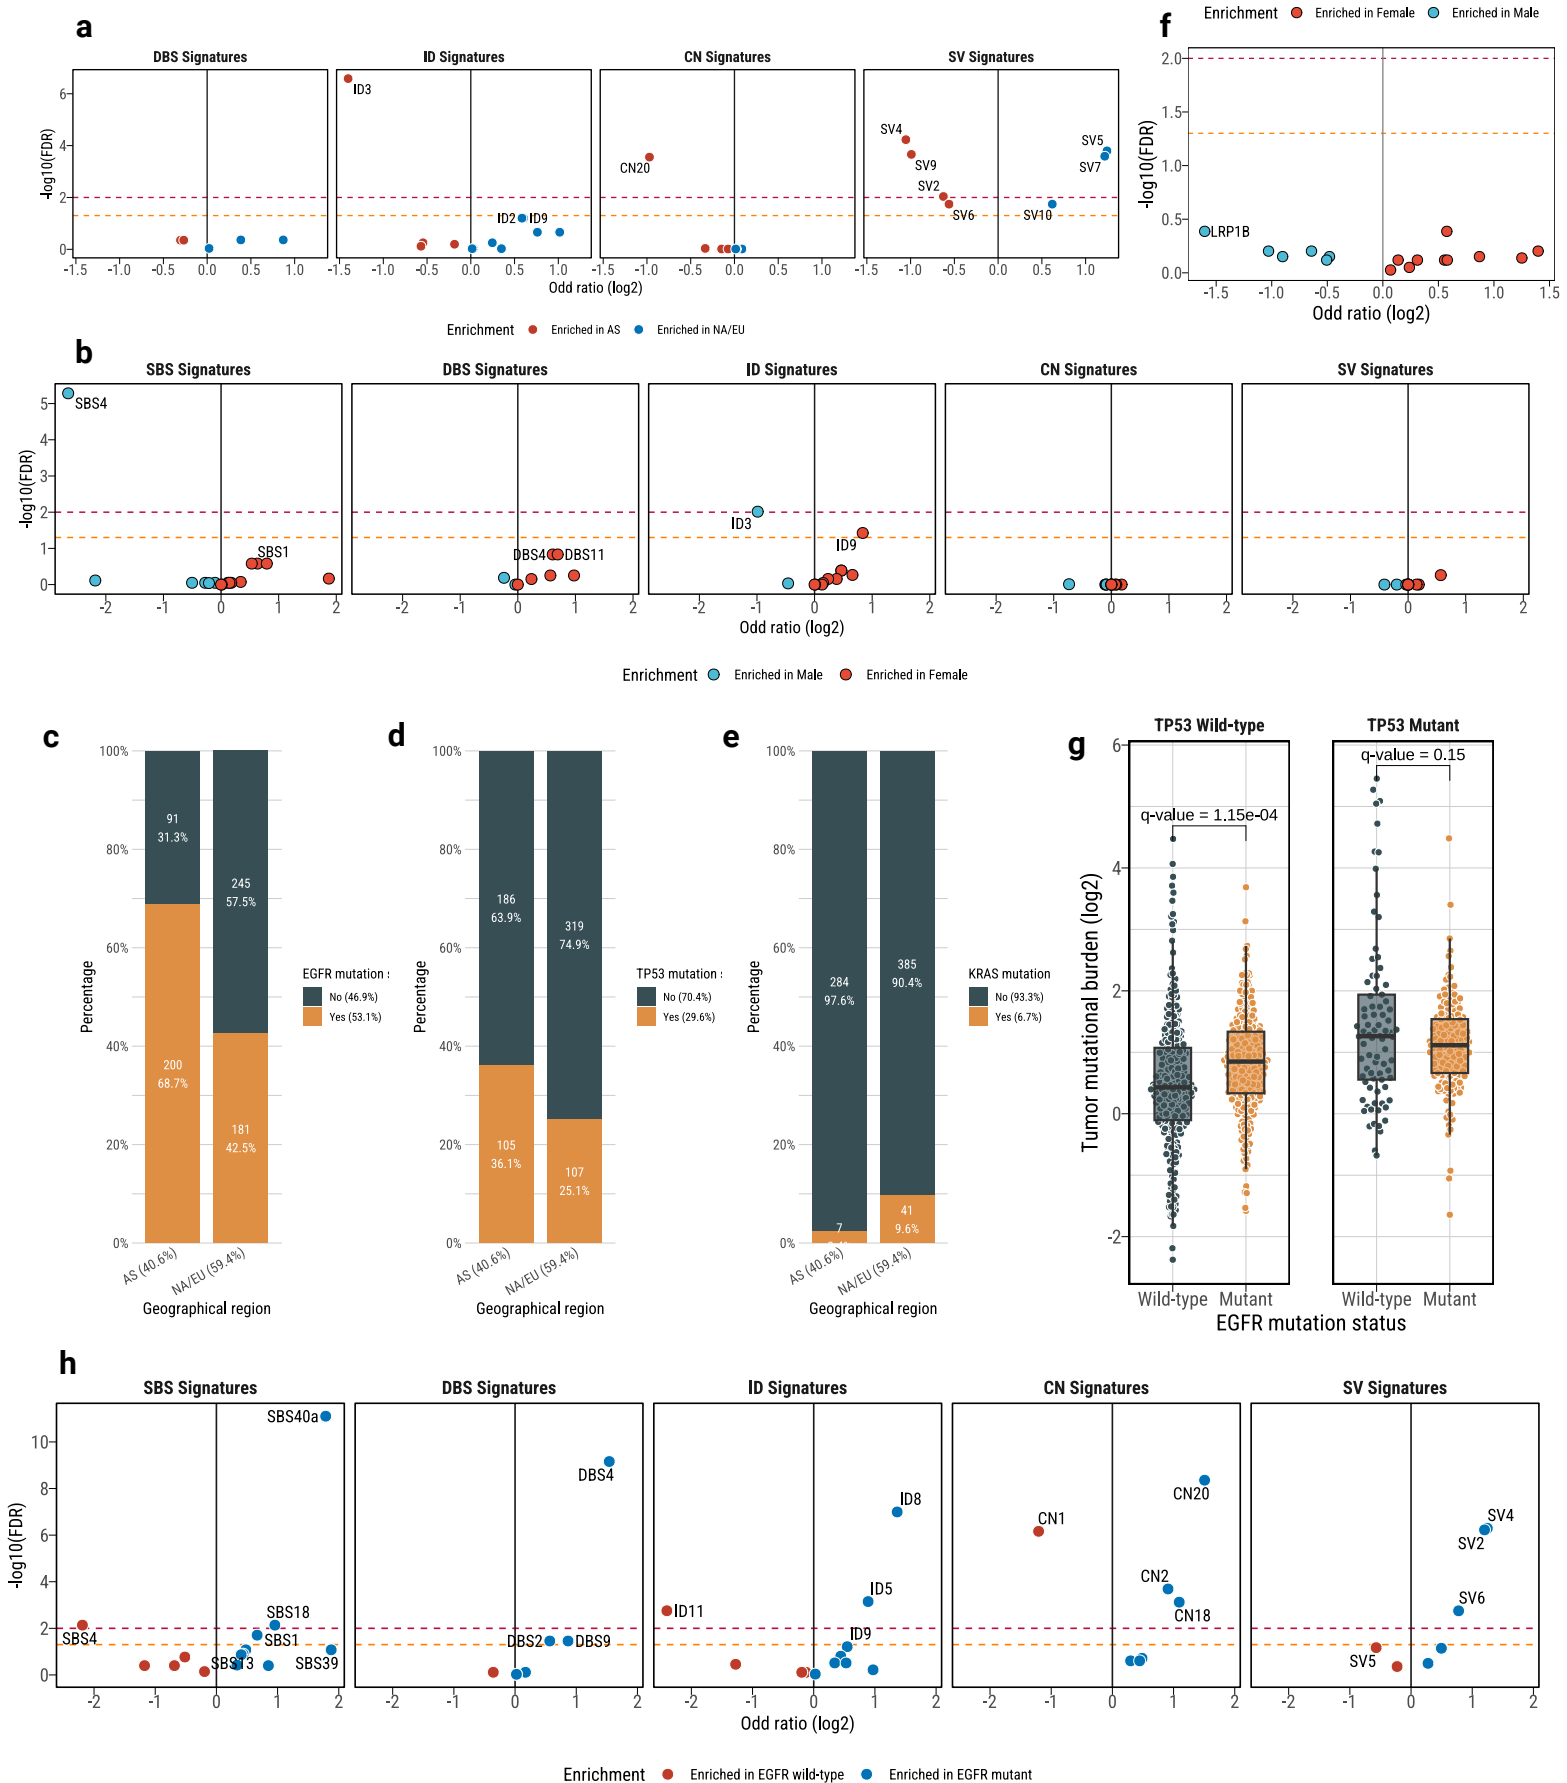

## Extended Data Fig. 2

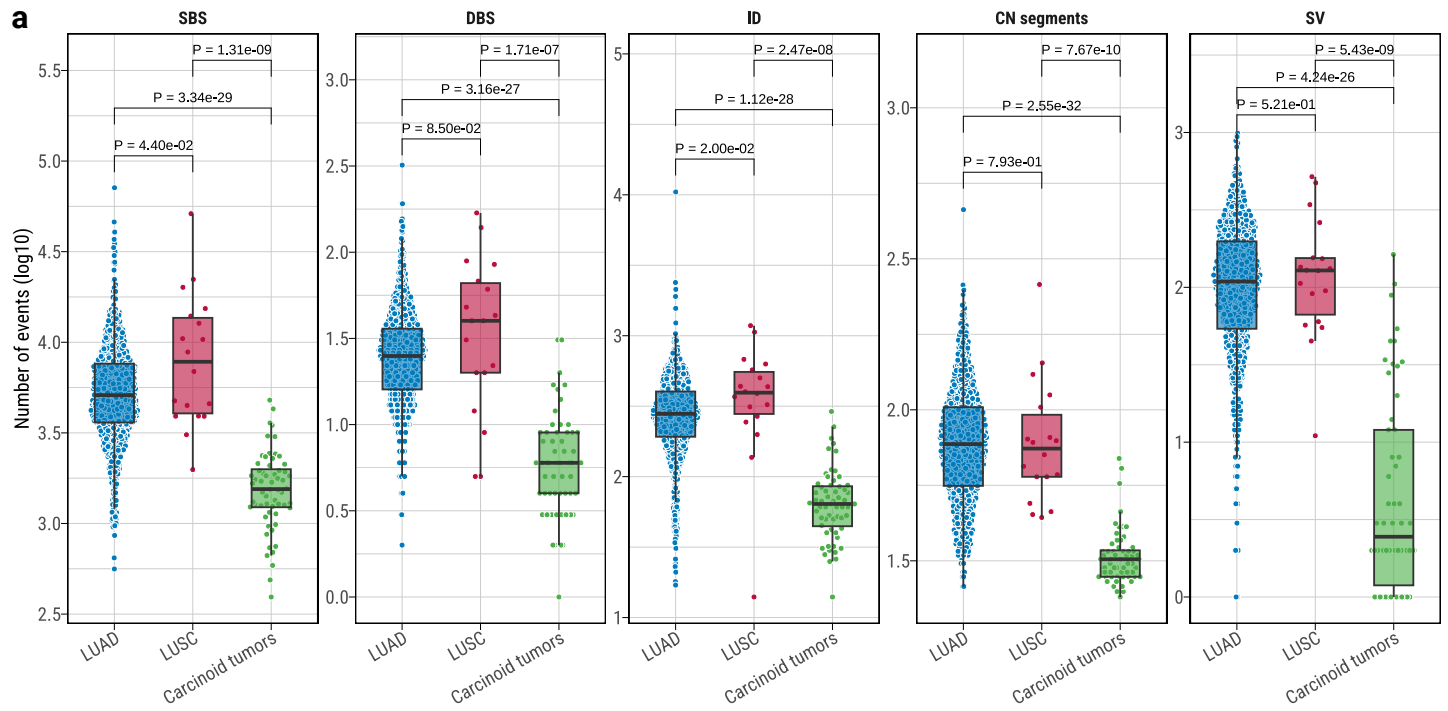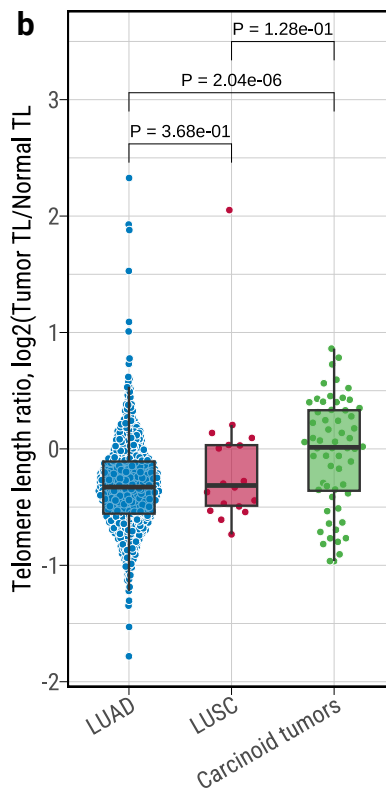

# Extended Data Fig. 3

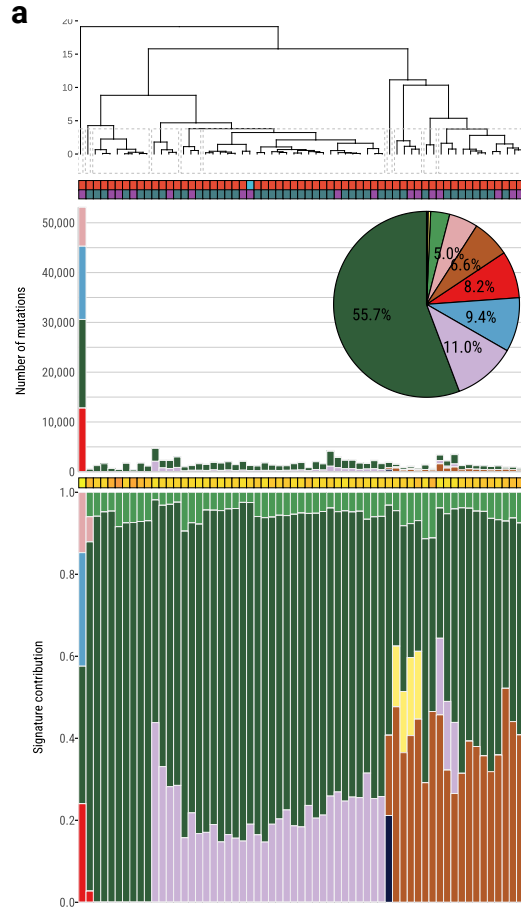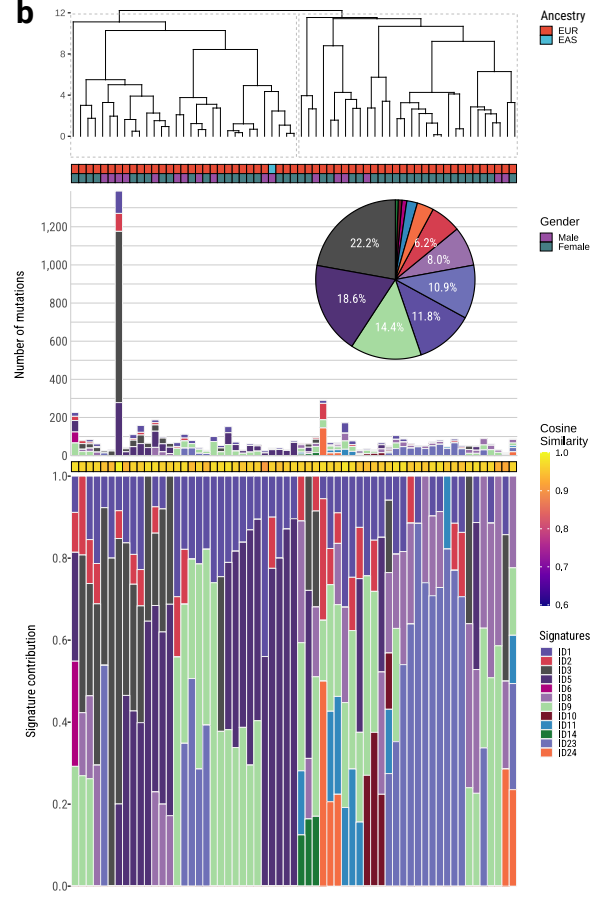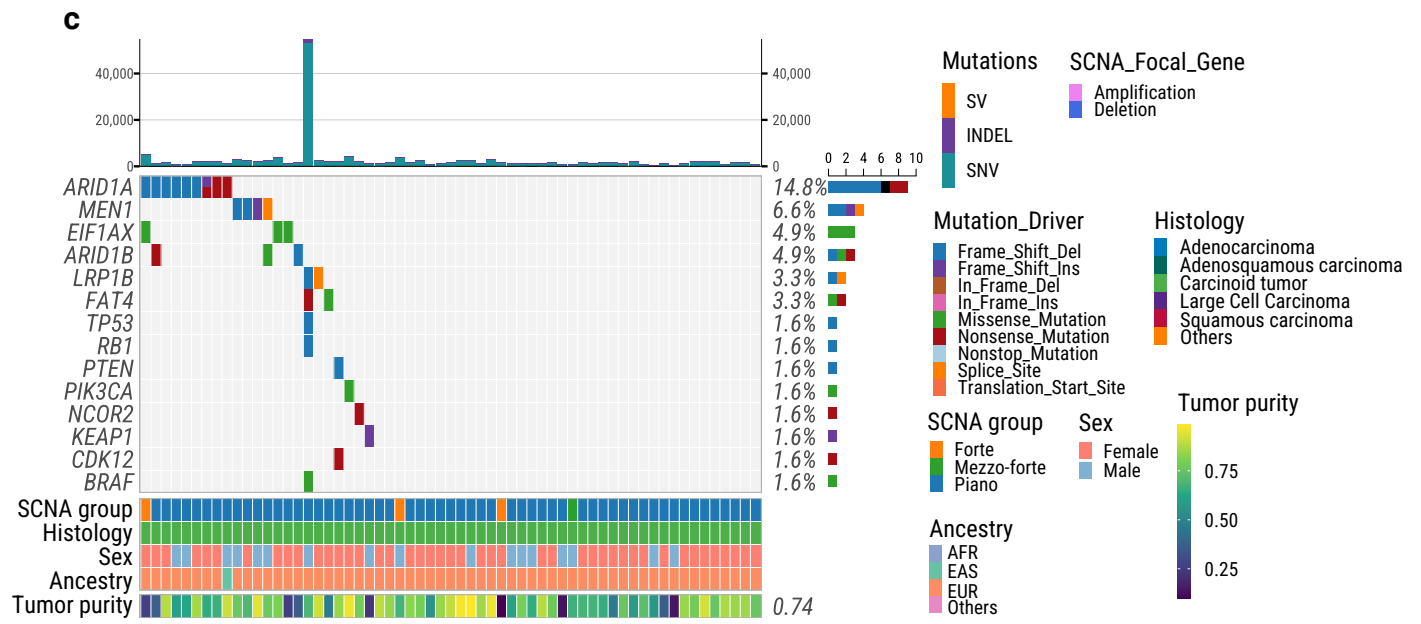

# Extended Data Fig. 4

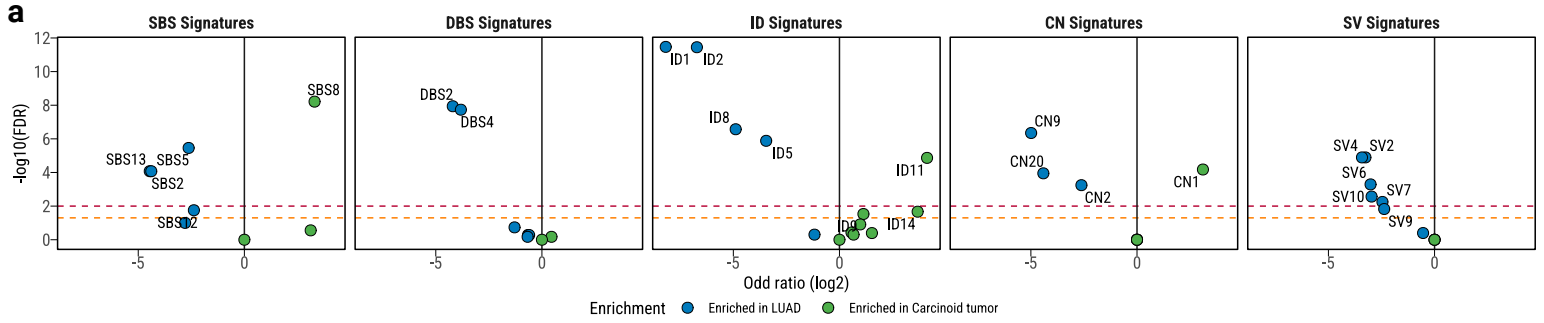

**b** Enrichment ● Enriched in Carcinoid tumors ● Enriched in LUAD

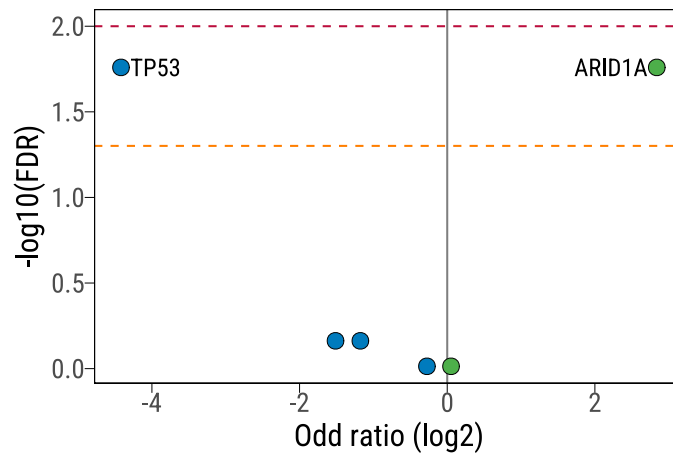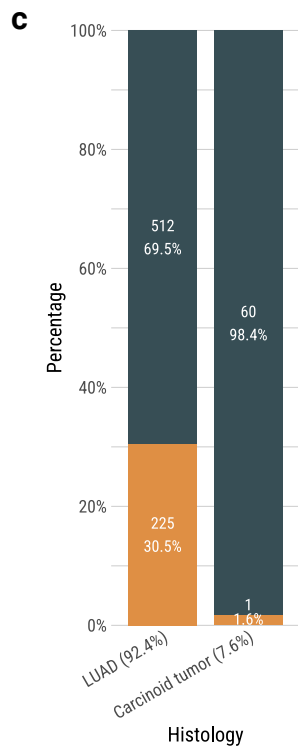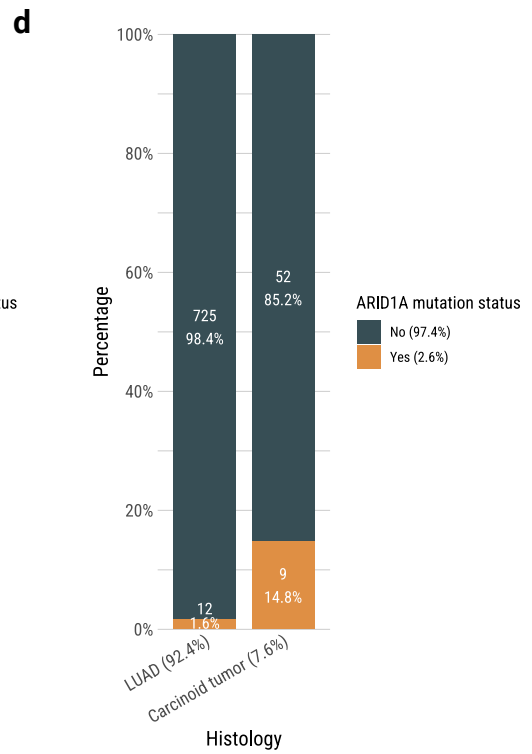

# Extended Data Fig. 5

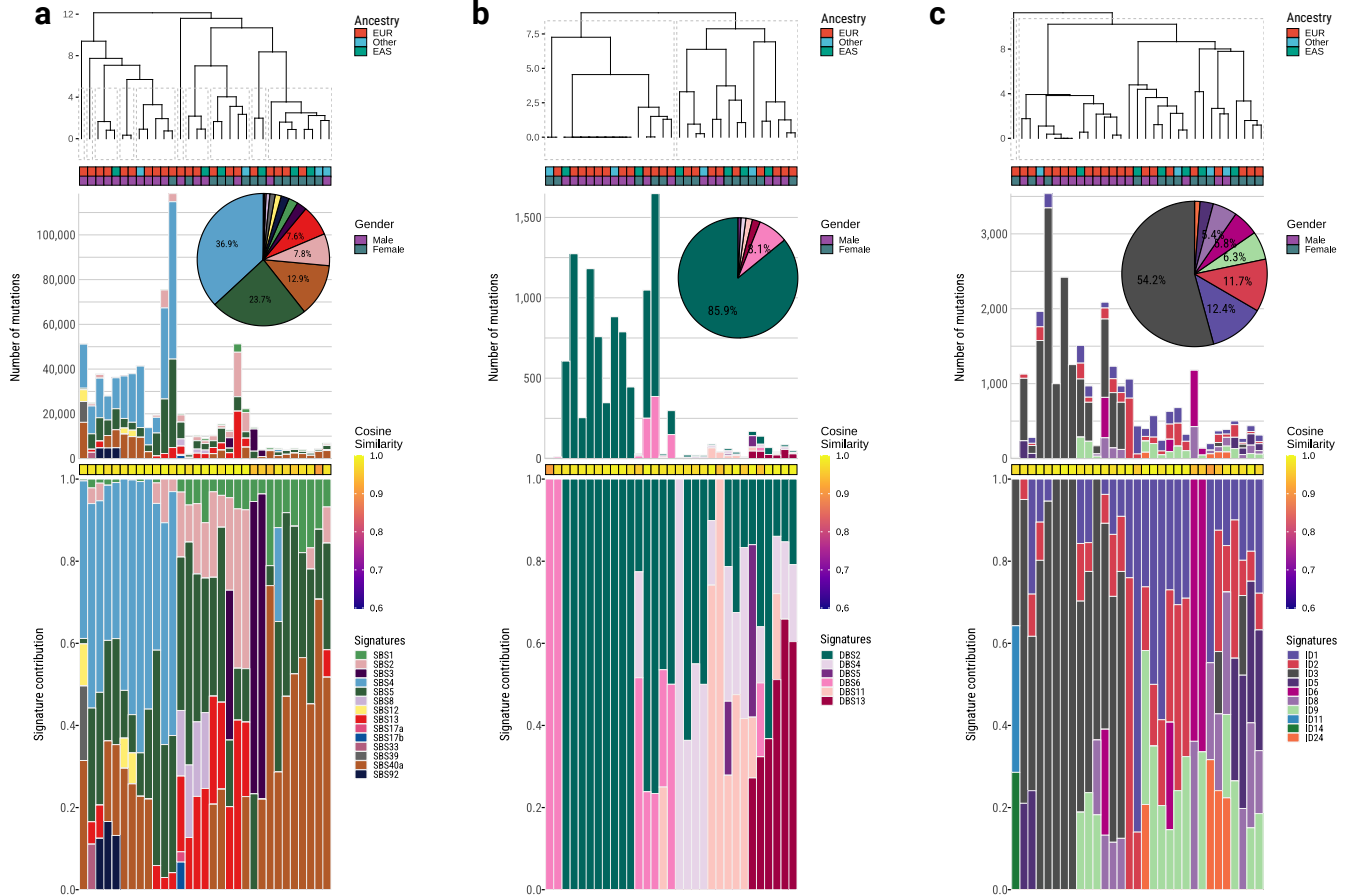

**d**

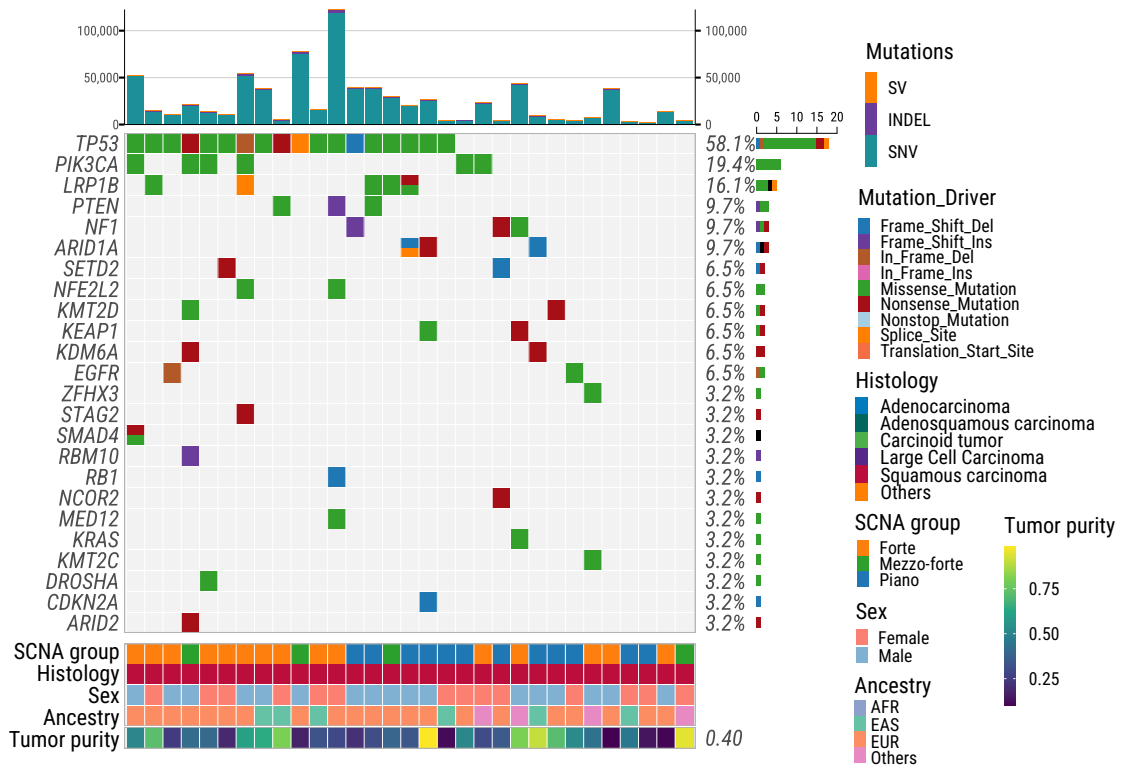

# Extended Data Fig. 6

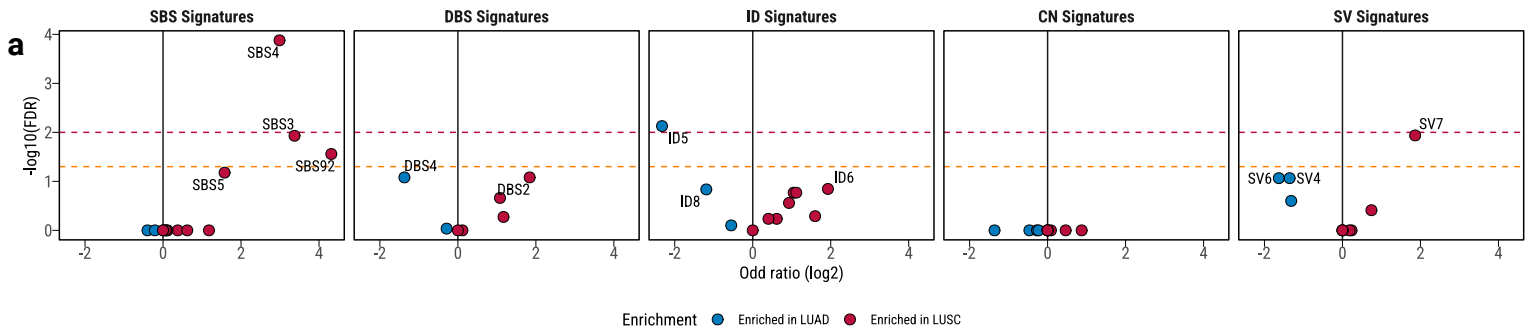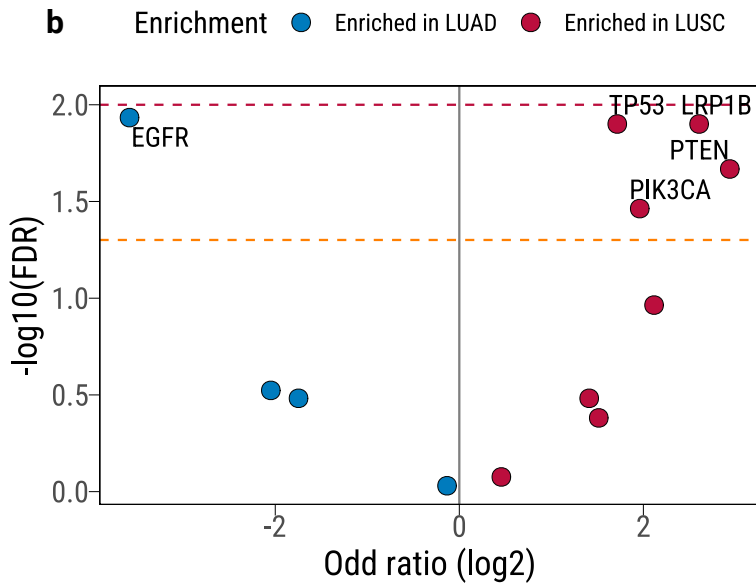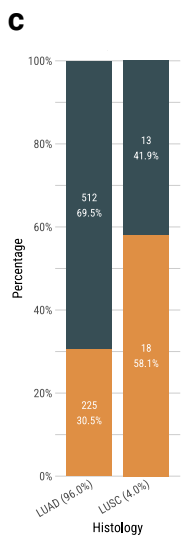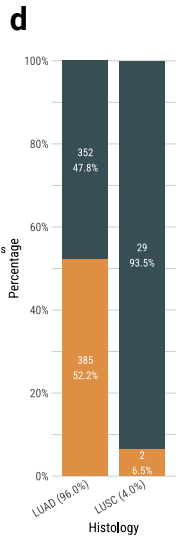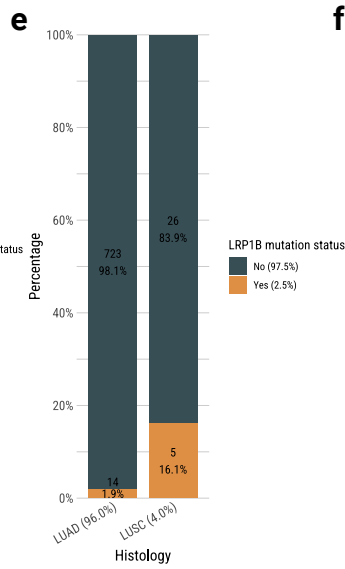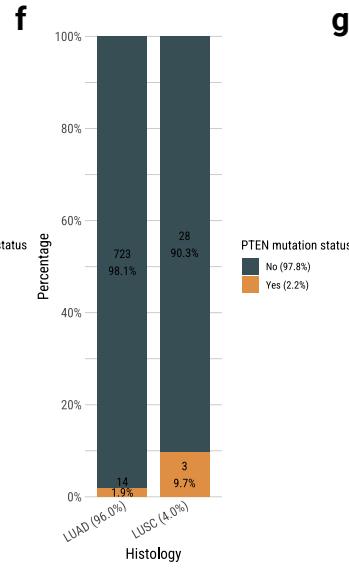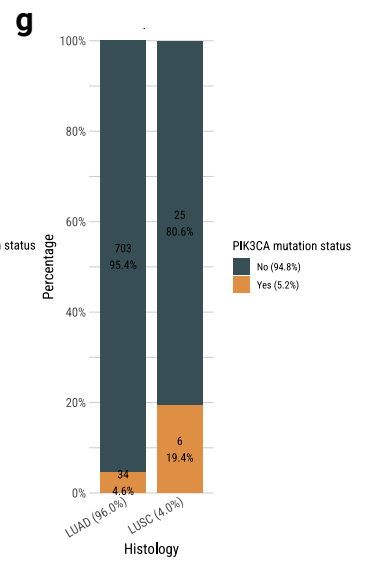

Extended Data Fig. 7

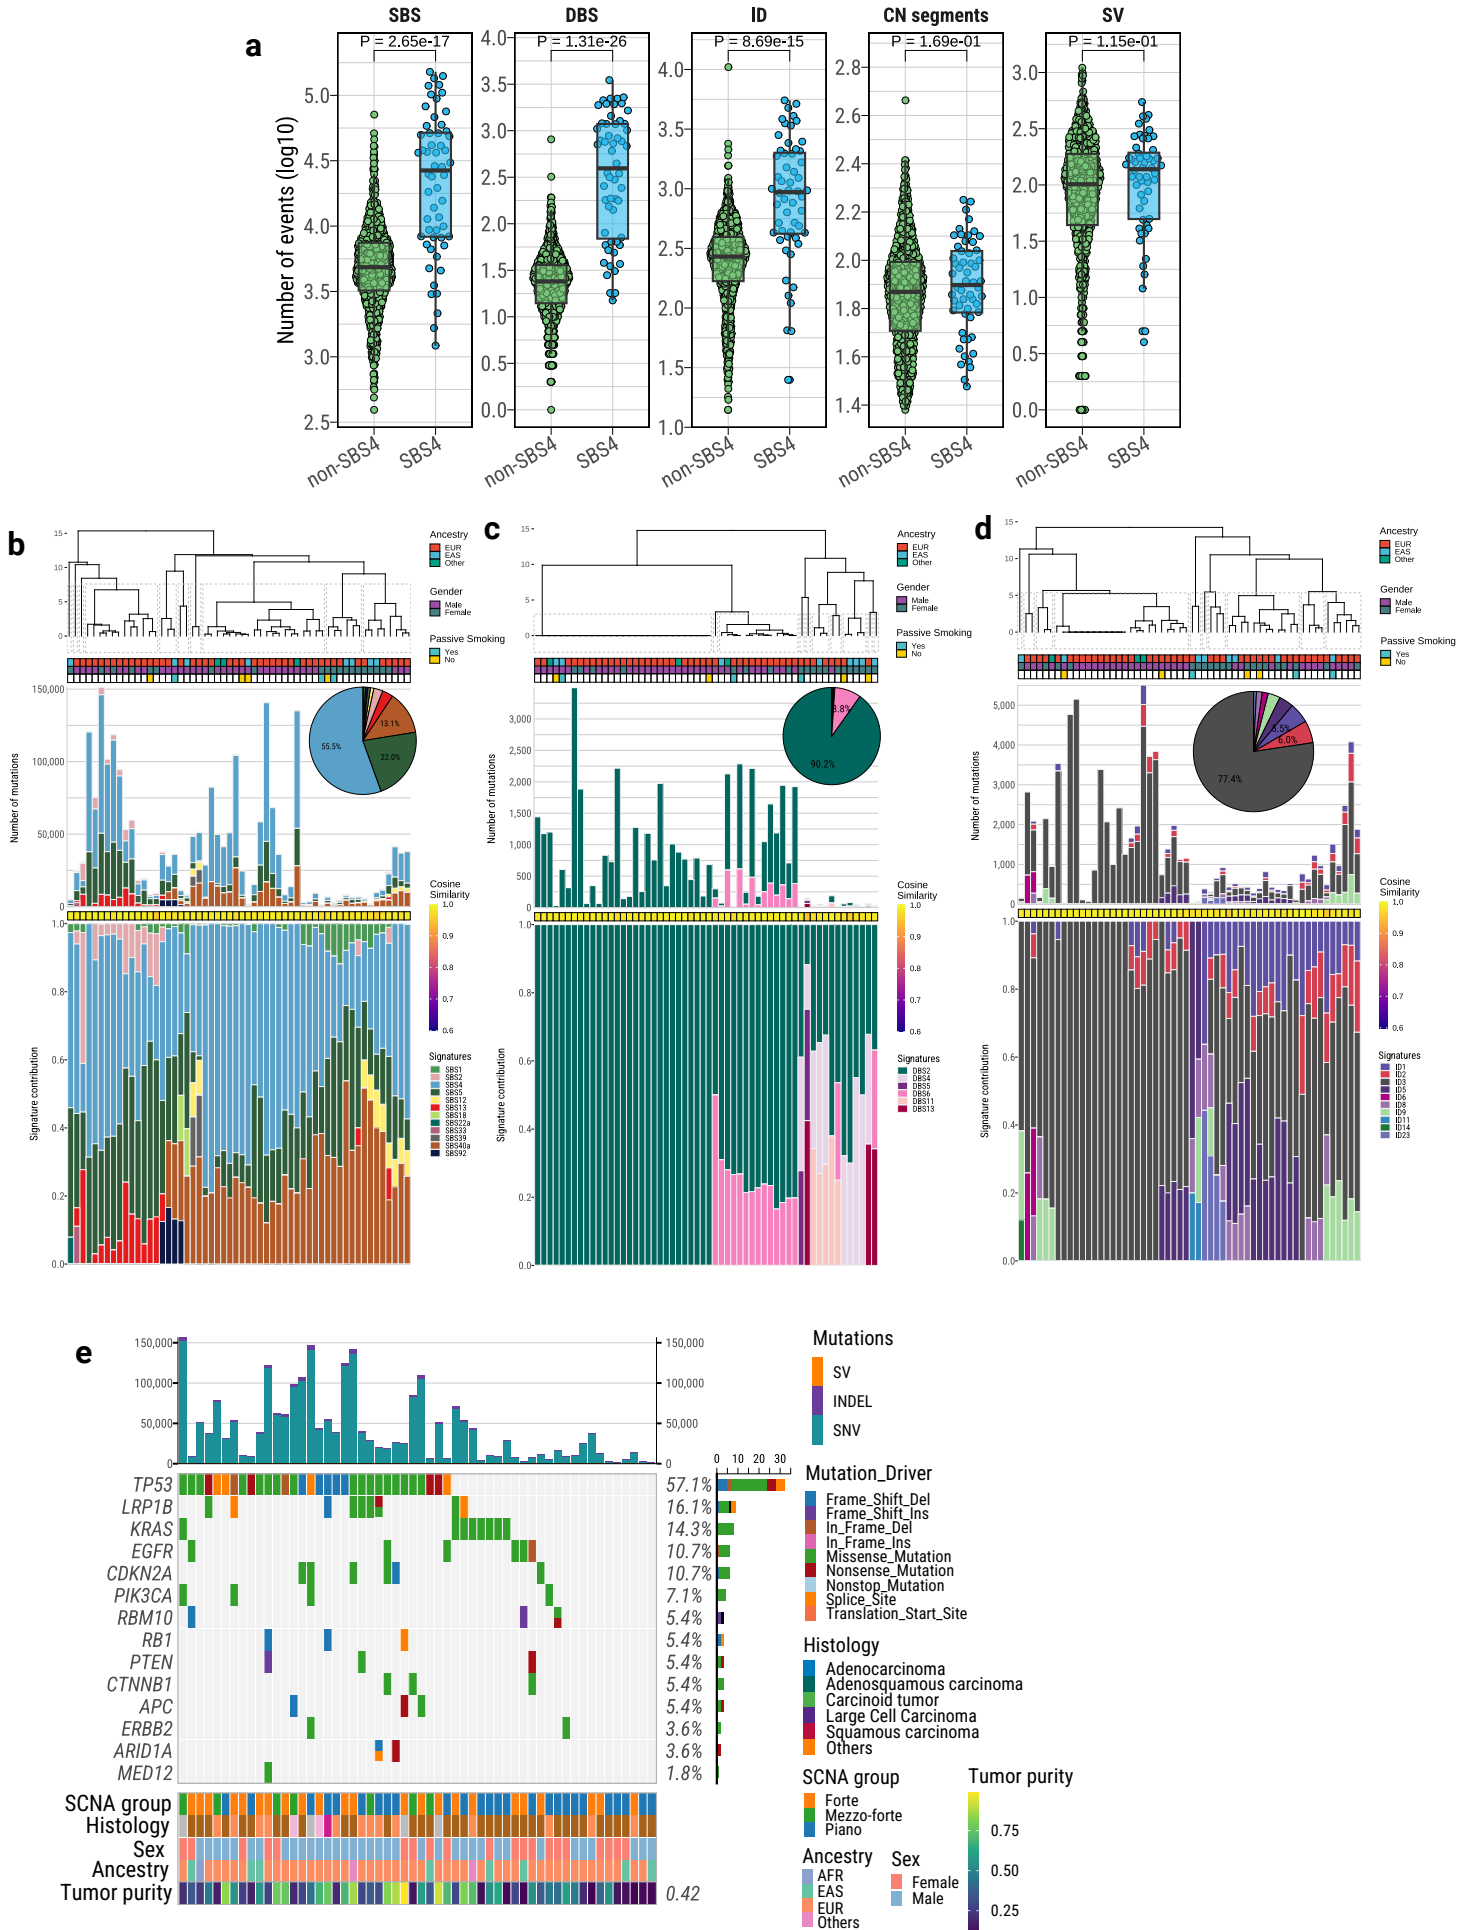

# Extended Data Fig. 8

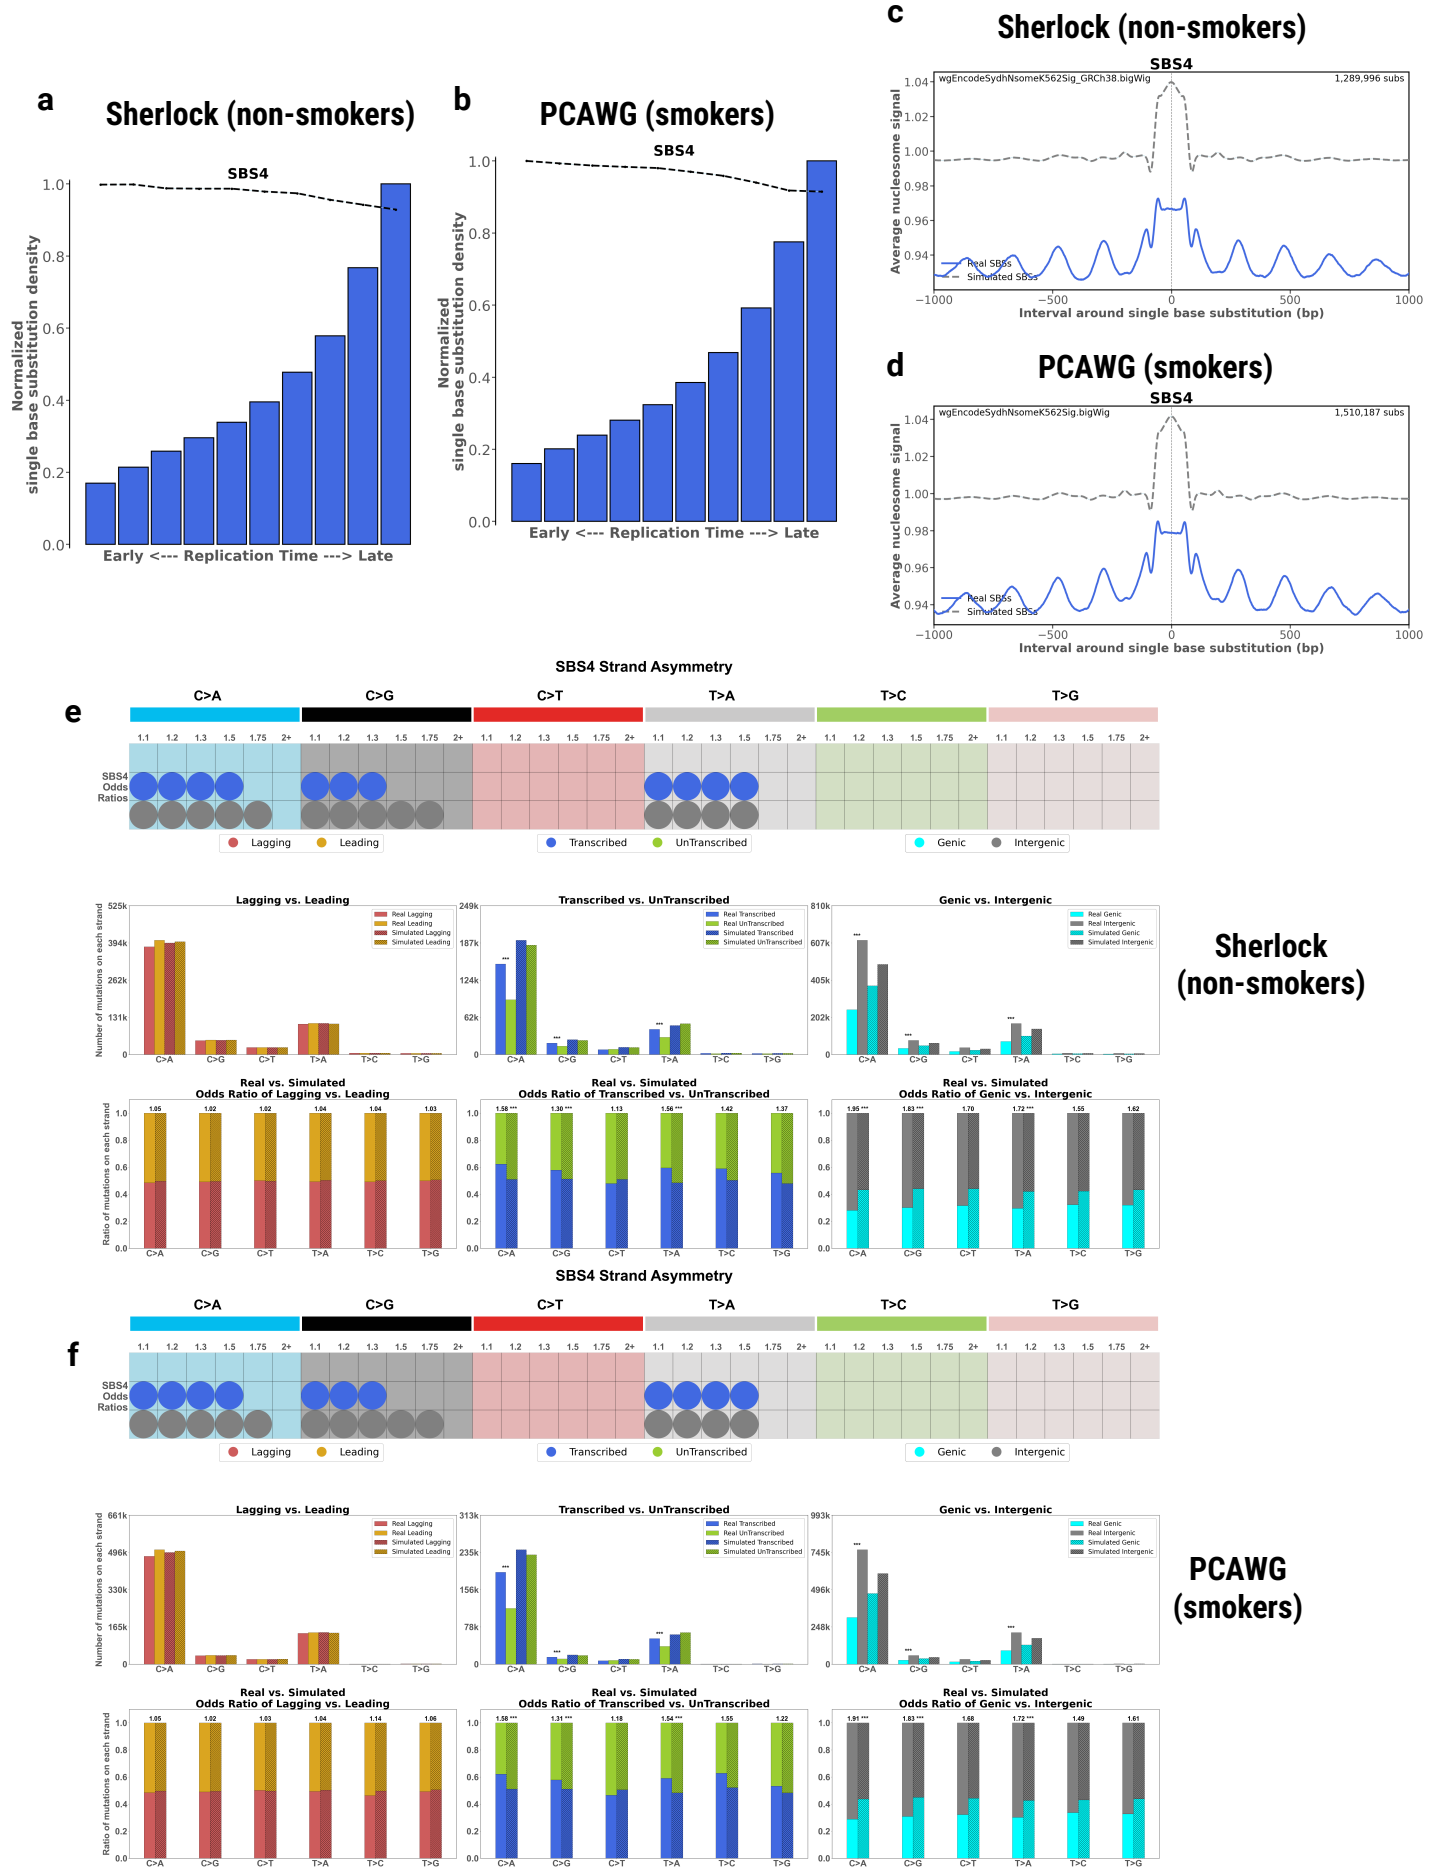



# Extended Data Fig. 9

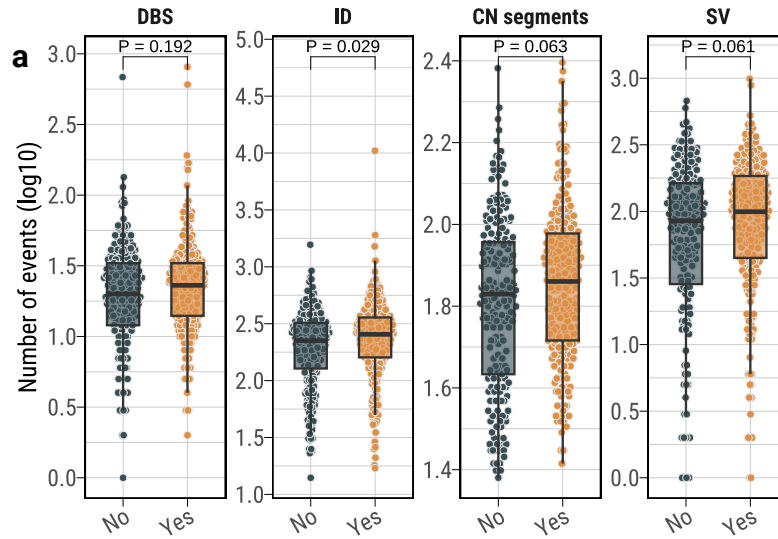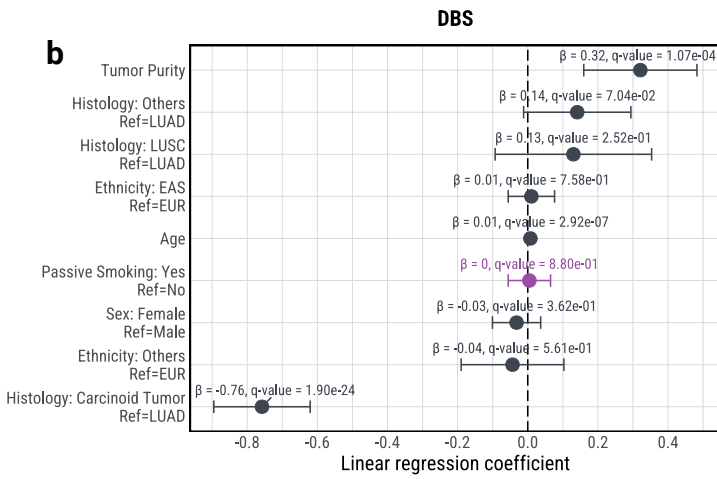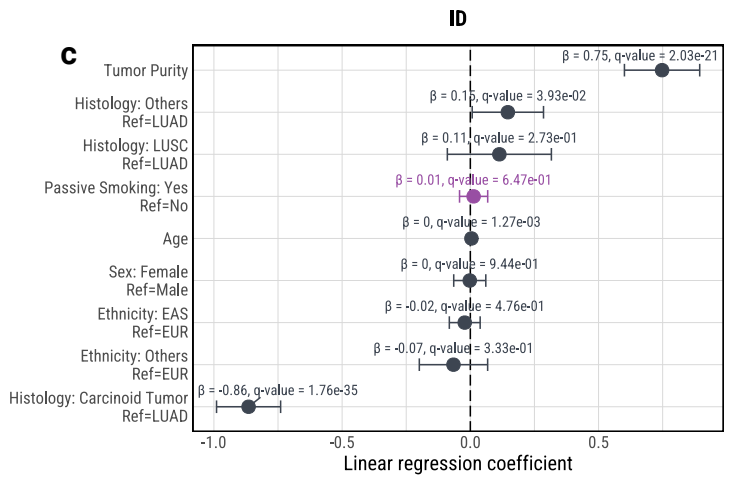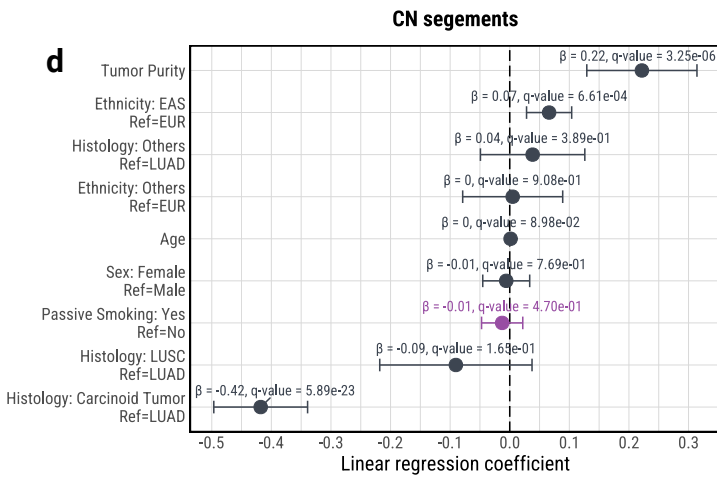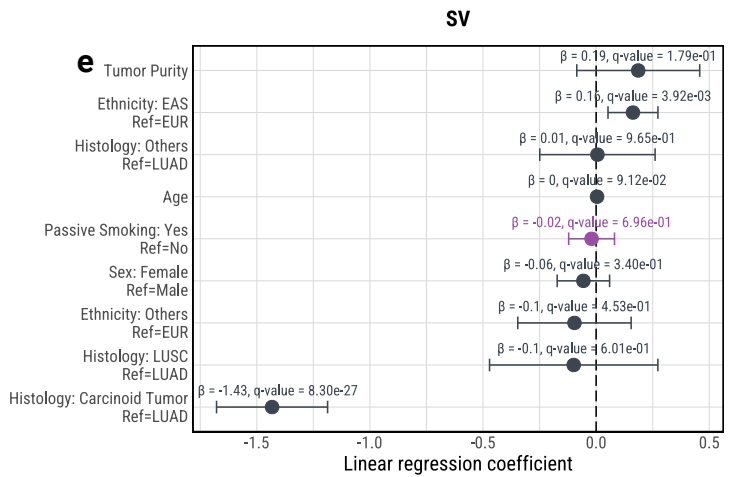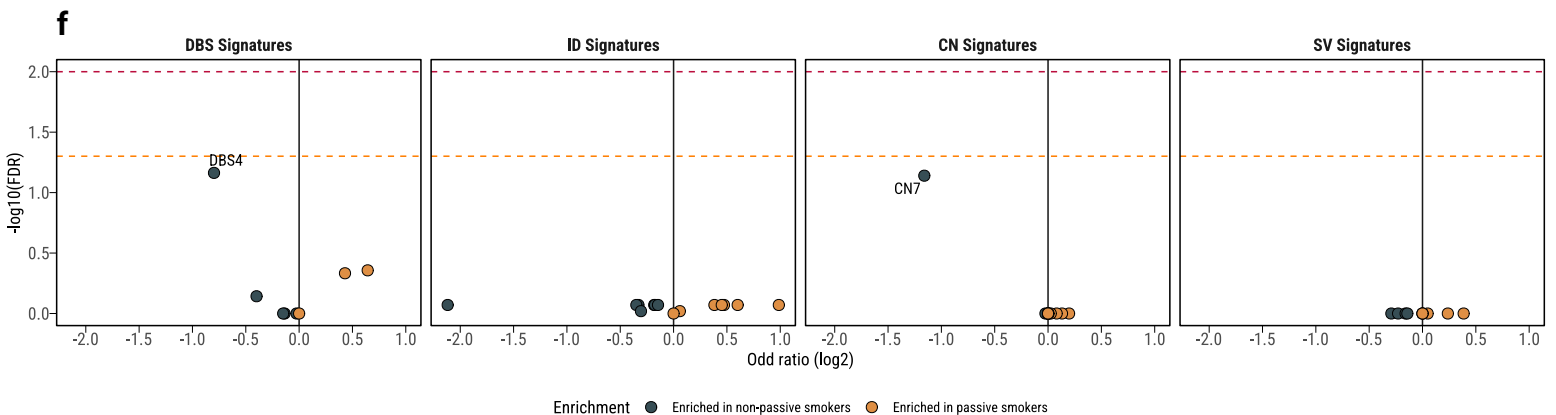

# Extended Data Fig. 10

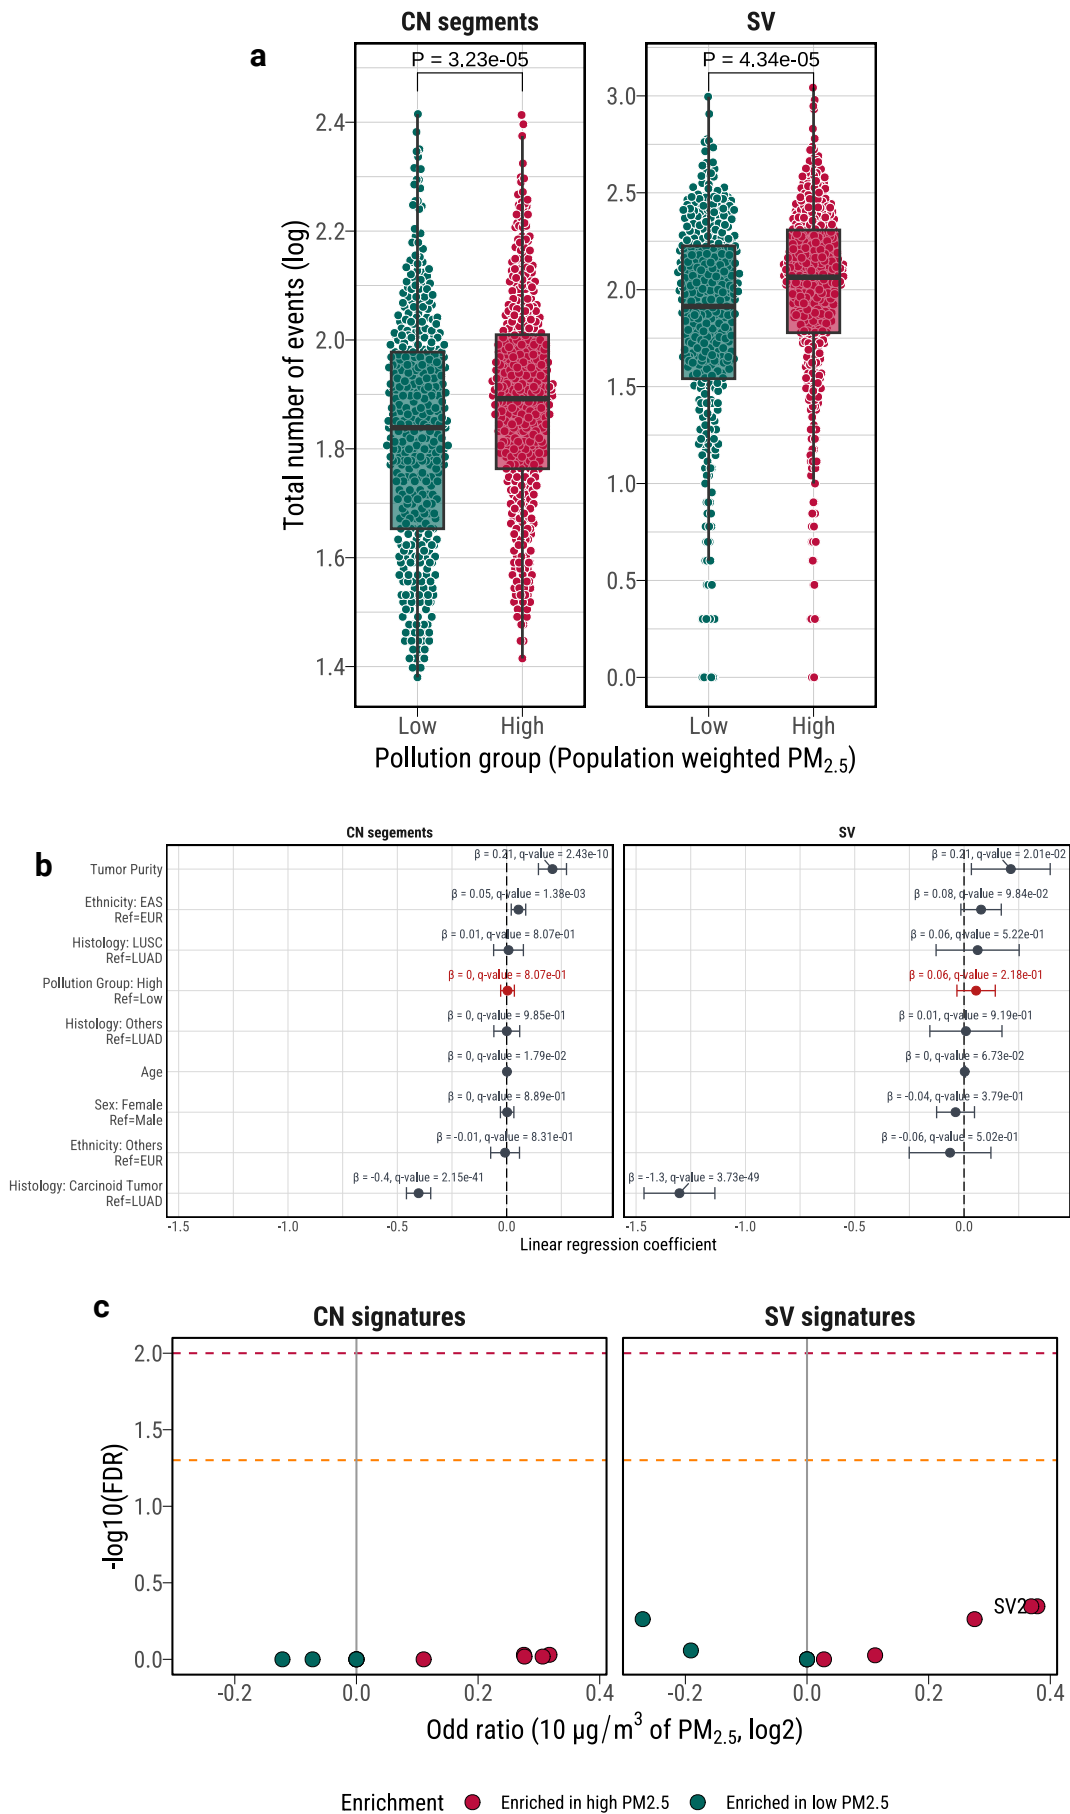

# Extended Data Fig. 11

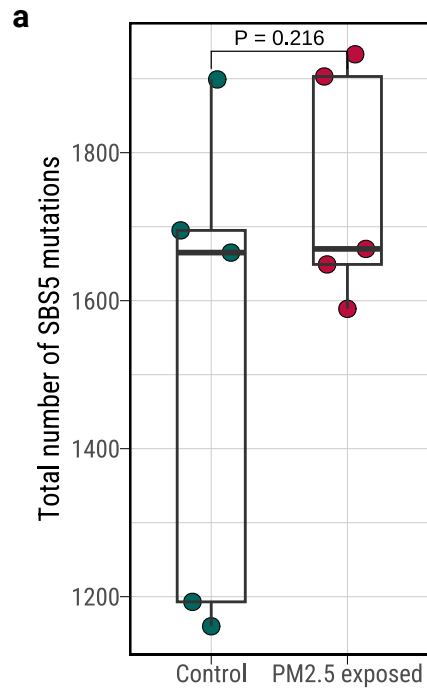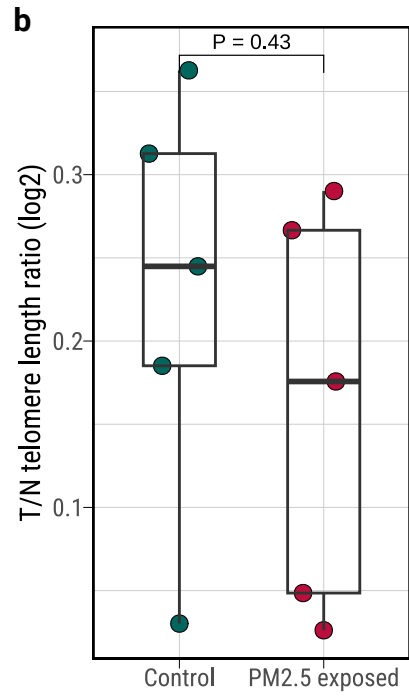

**Extended Data Fig. 12**

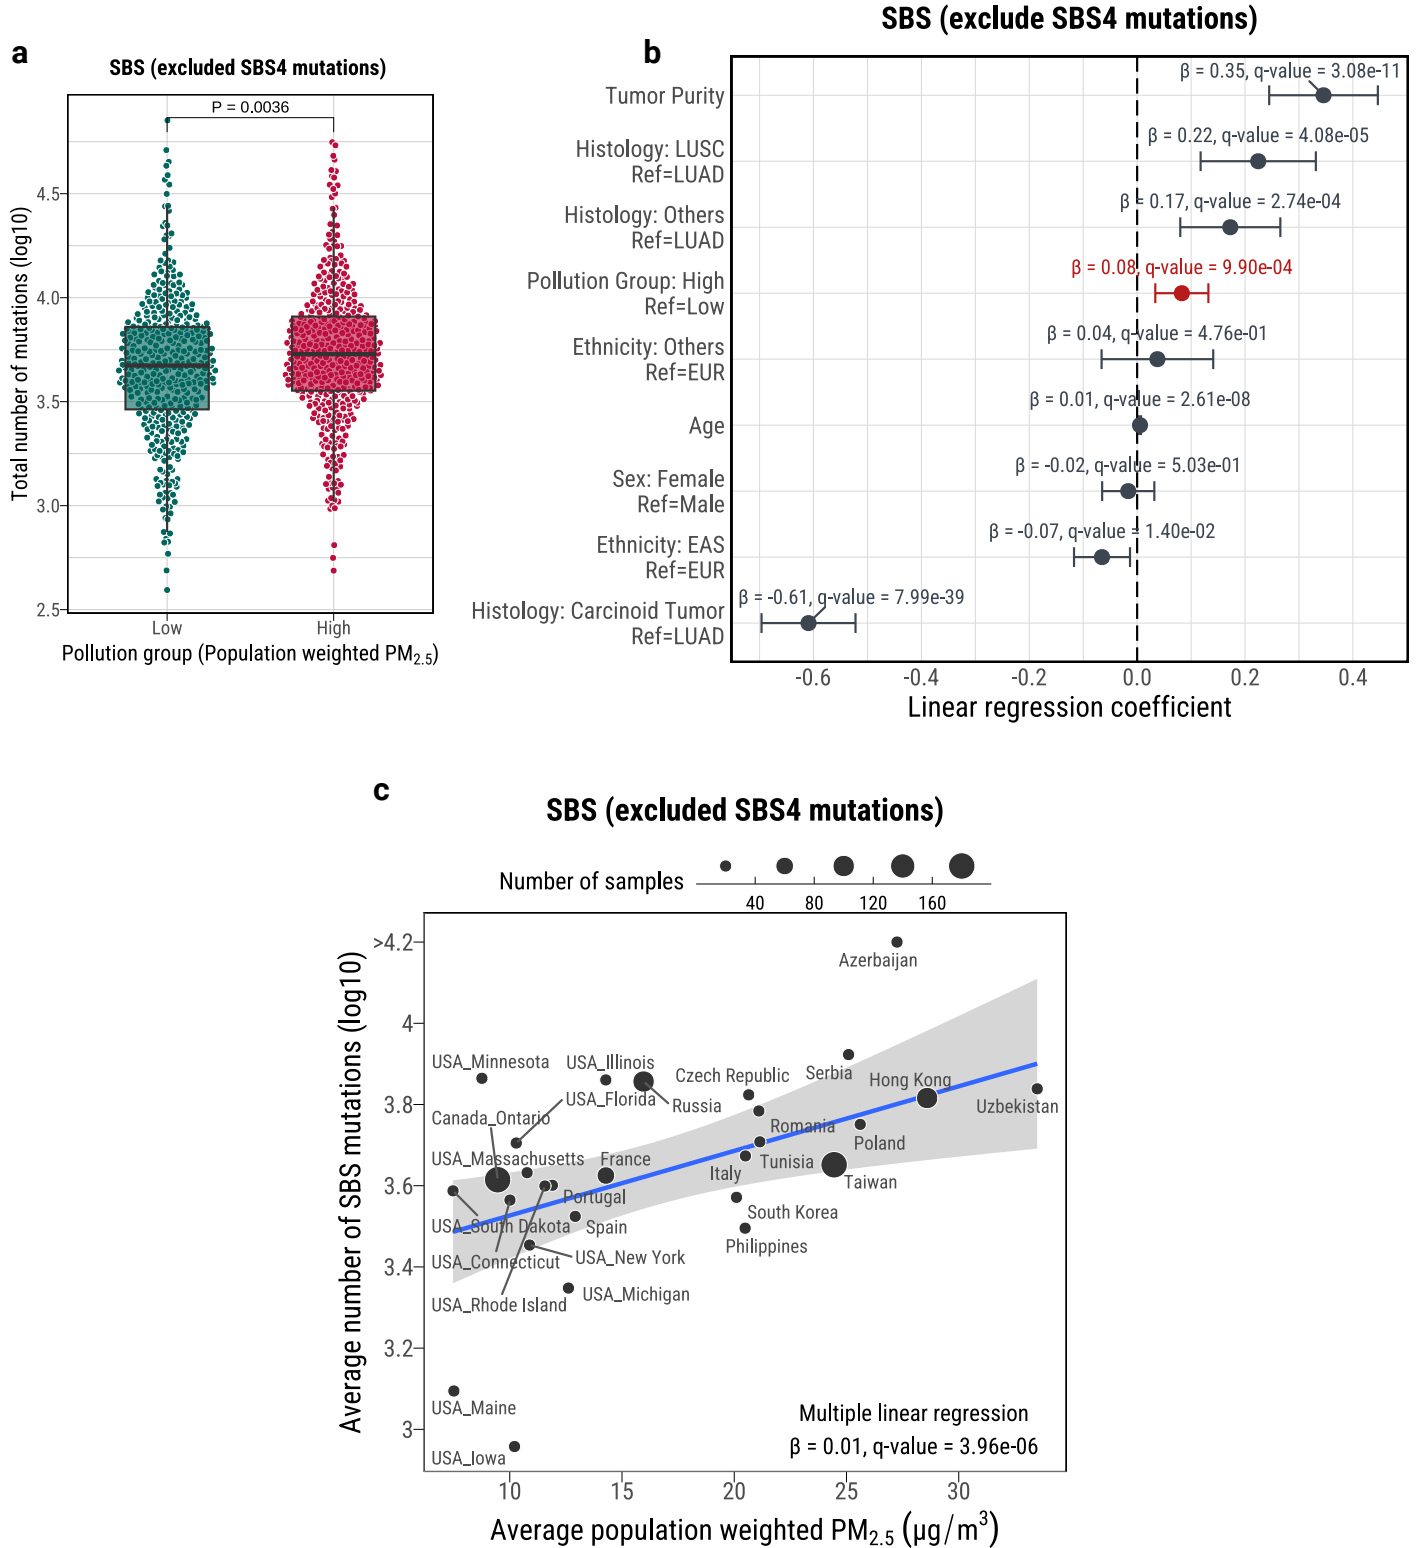

Supplement: media-1.pdf [file media-1.pdf]
