# Supplementary material for: The mutagenic forces shaping the genomic landscape of lung cancer in never smokers
Source: PubMed Central journal article supplement (PMC11118654; doi:10.1101/2024.05.15.24307318), 2024-05-17

# Supplementary Fig. 1

**a**

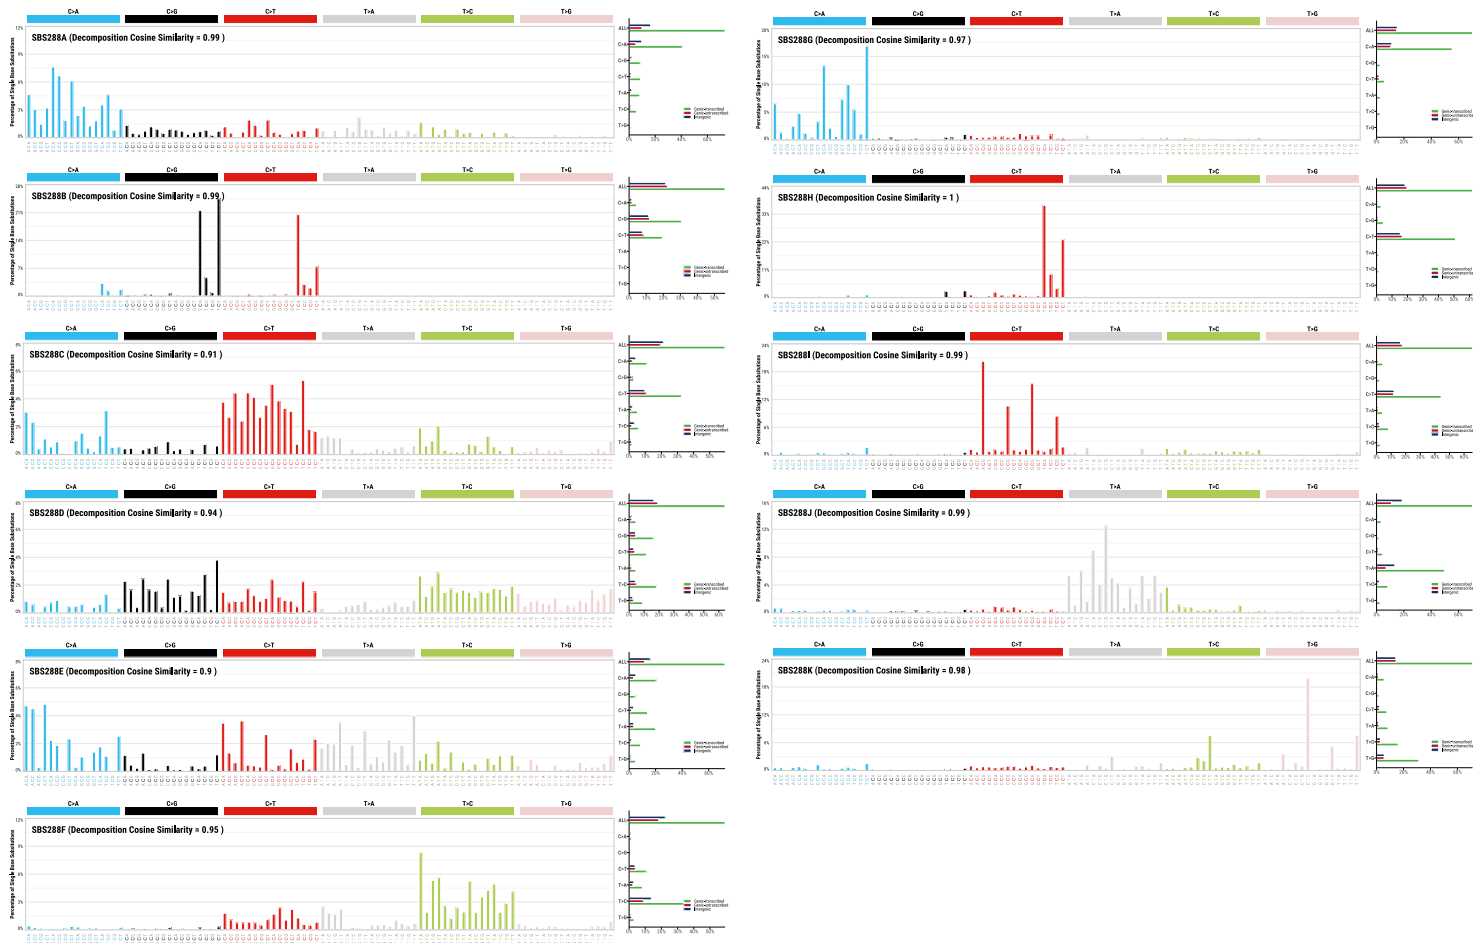

**b**

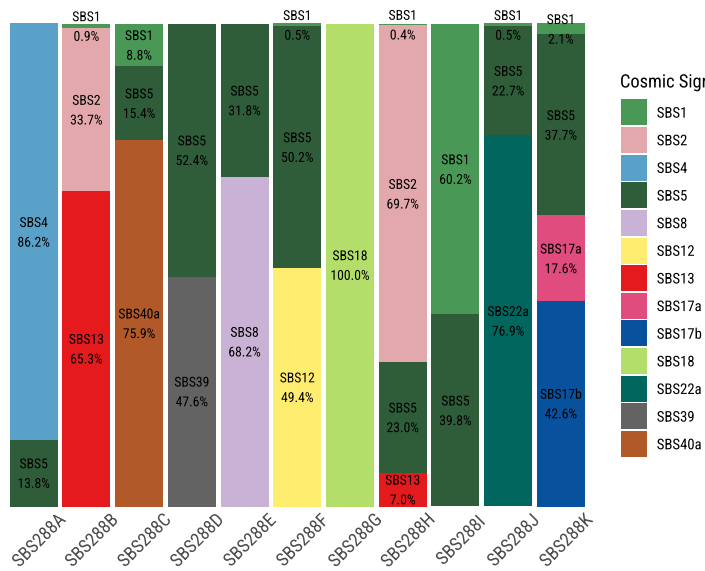

**c**

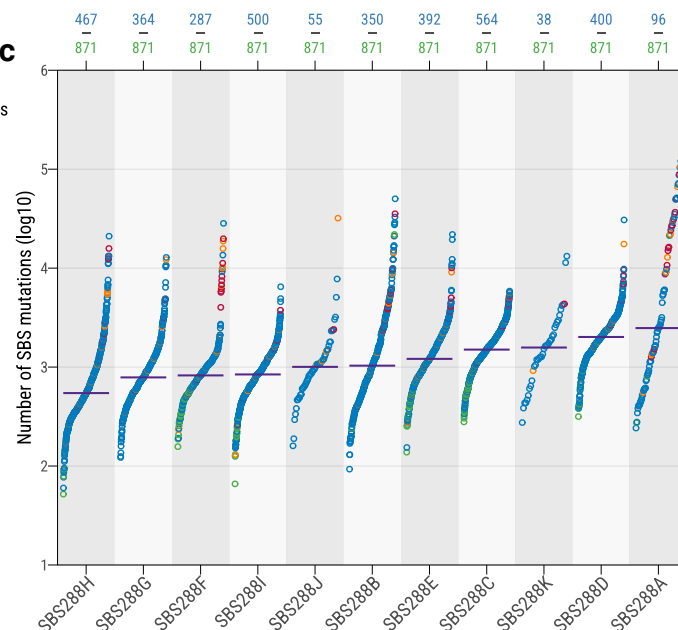

# Supplementary Fig. 2

**a**

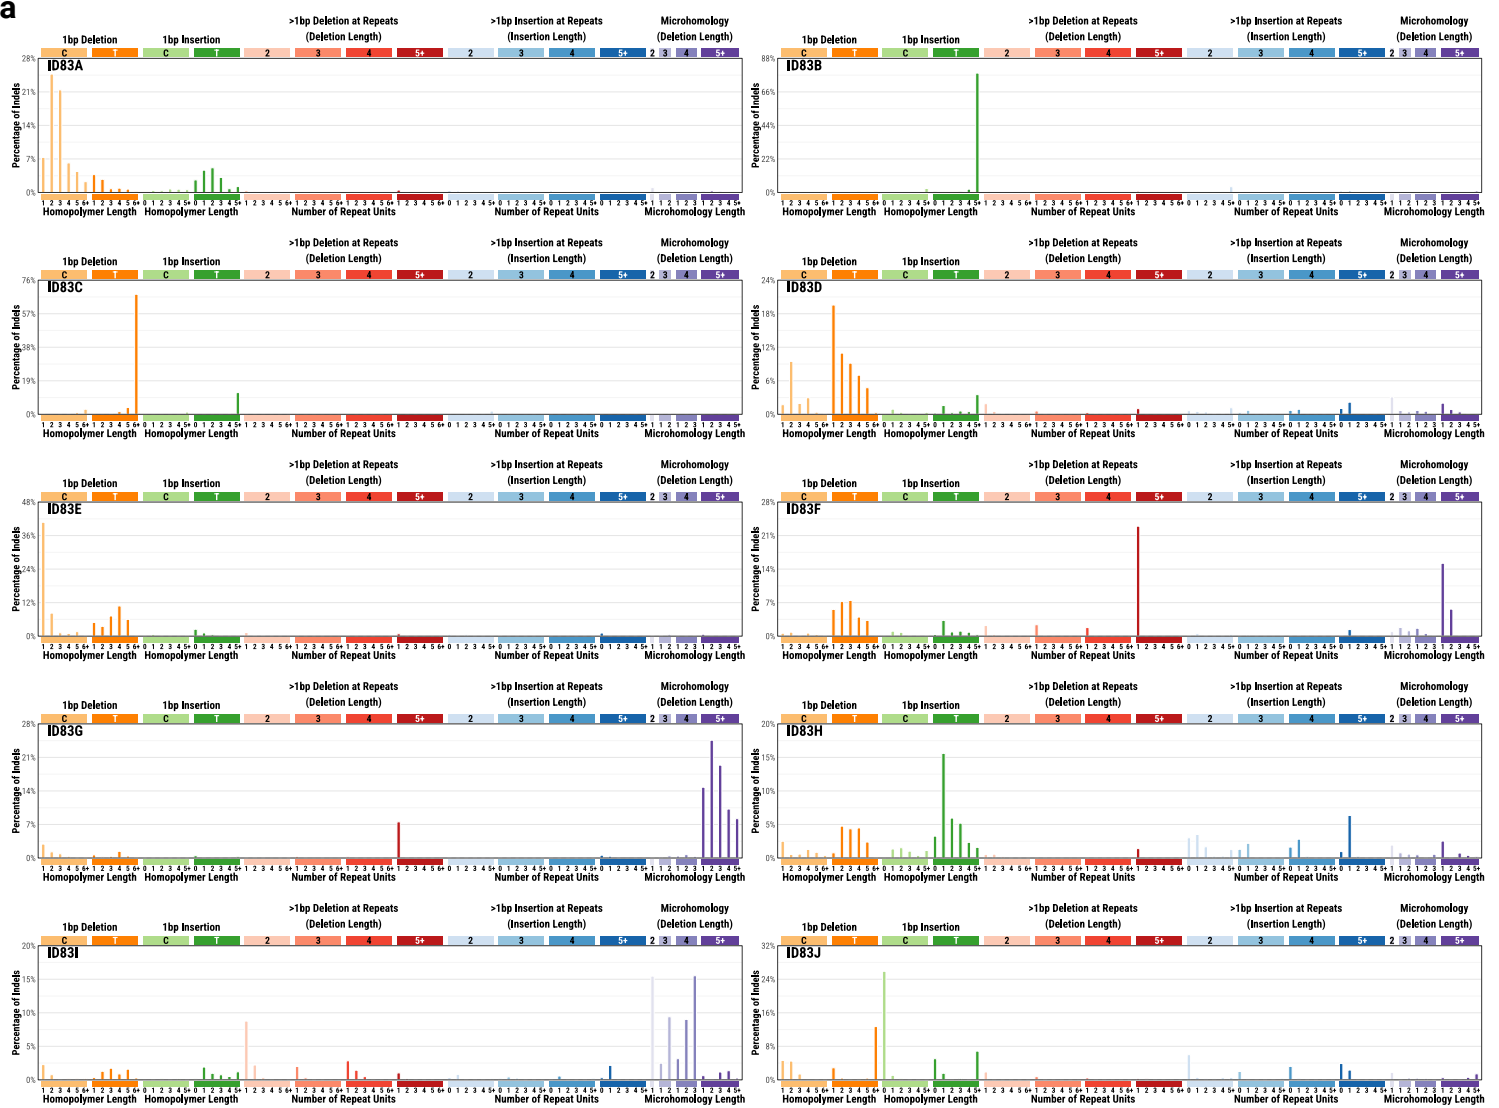

**b**

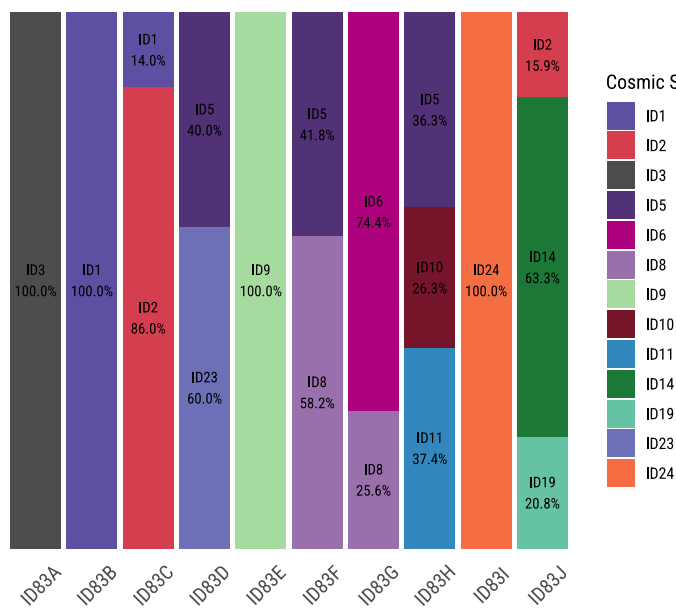

**c**

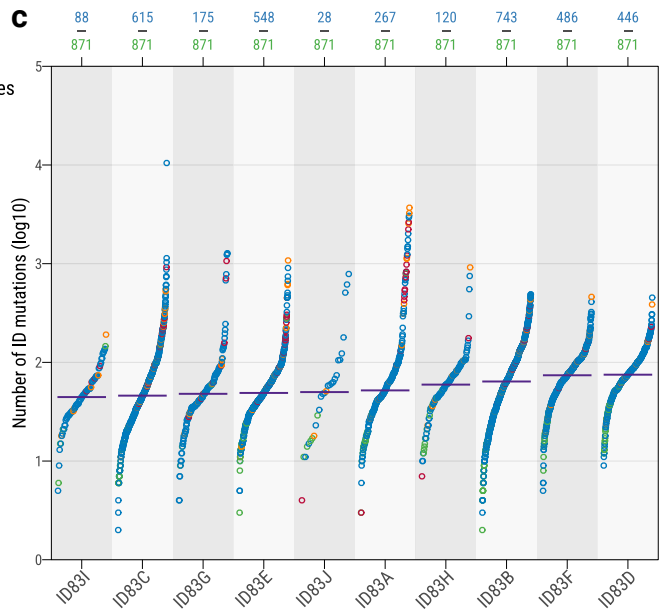

# Supplementary Fig. 3

**a**

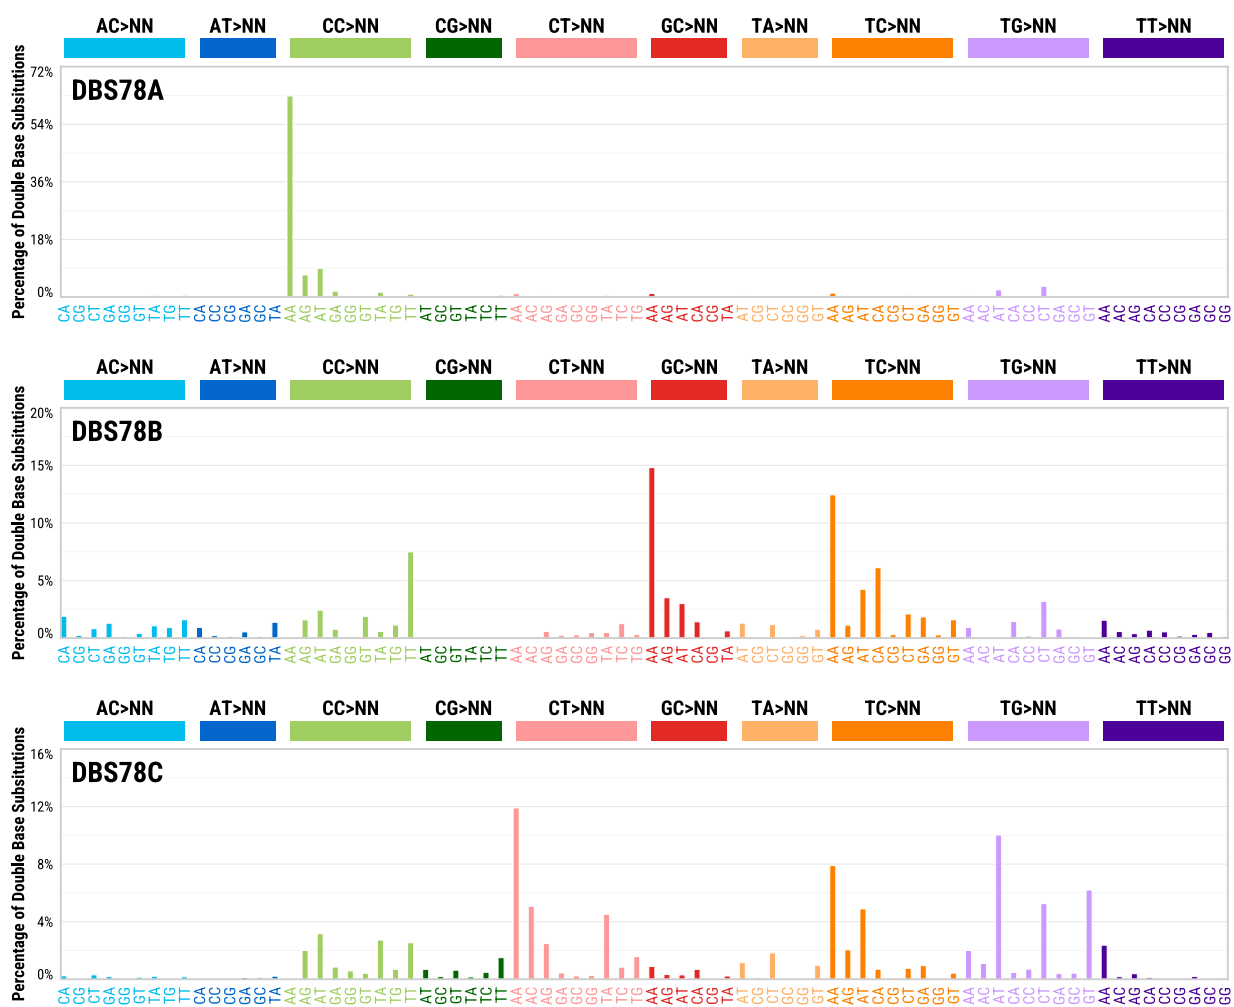

**b**

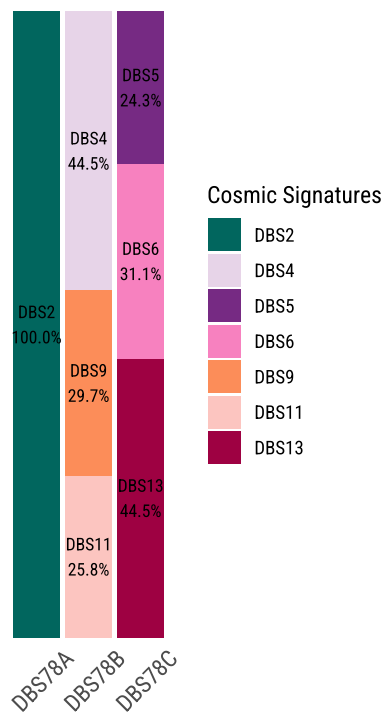

**c**

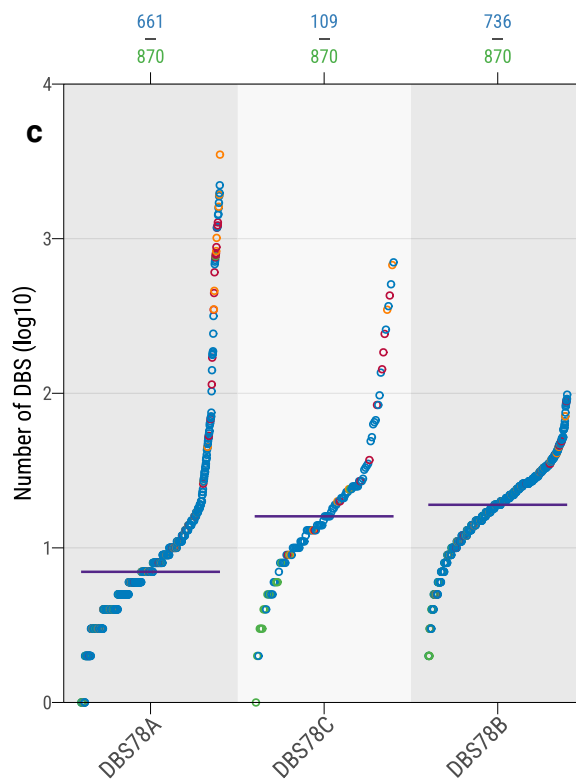

# Supplementary Fig. 4

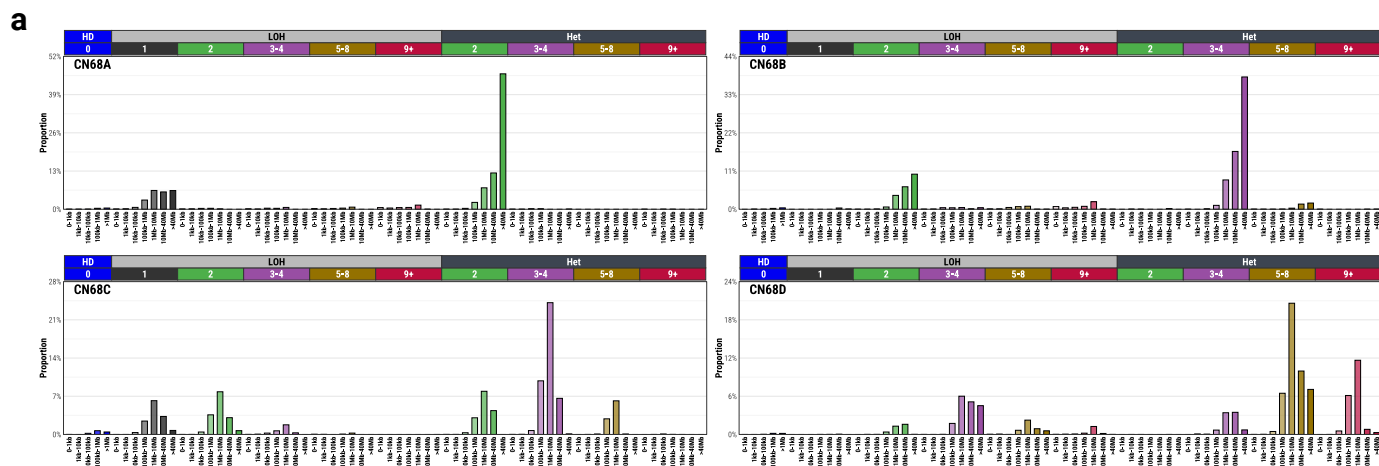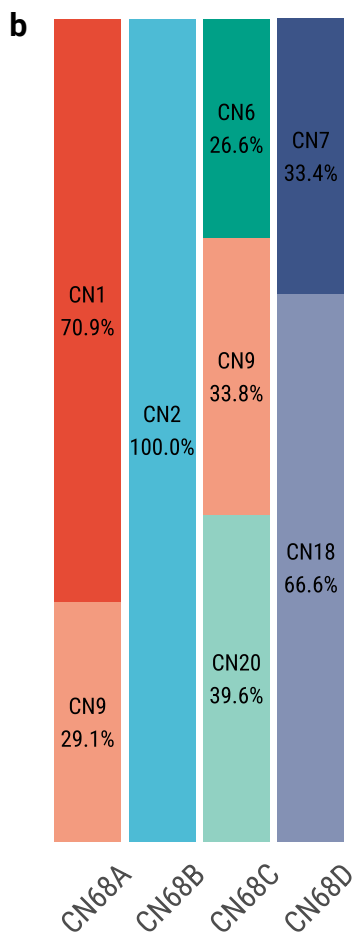

## Cosmic Signatures

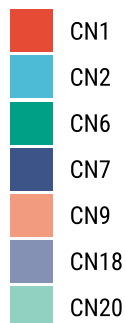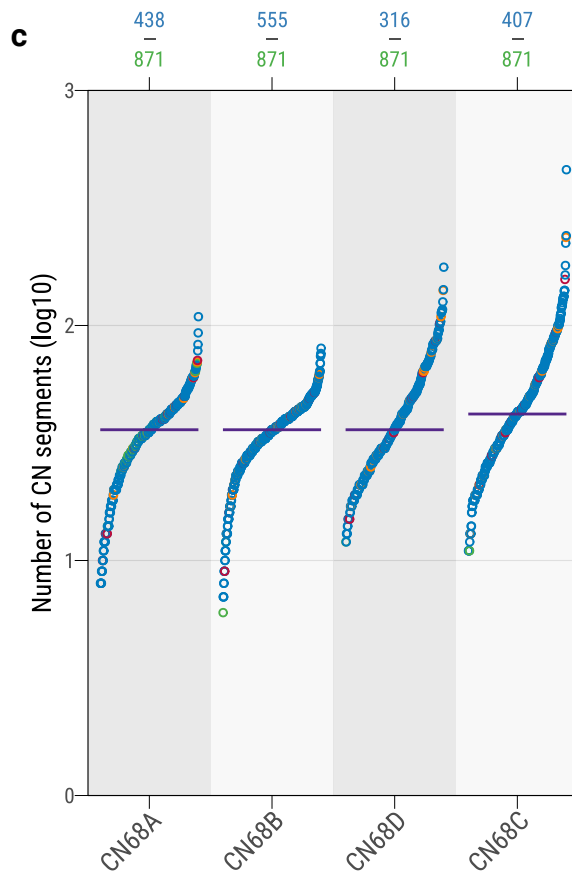

# Supplementary Fig. 5

**a**

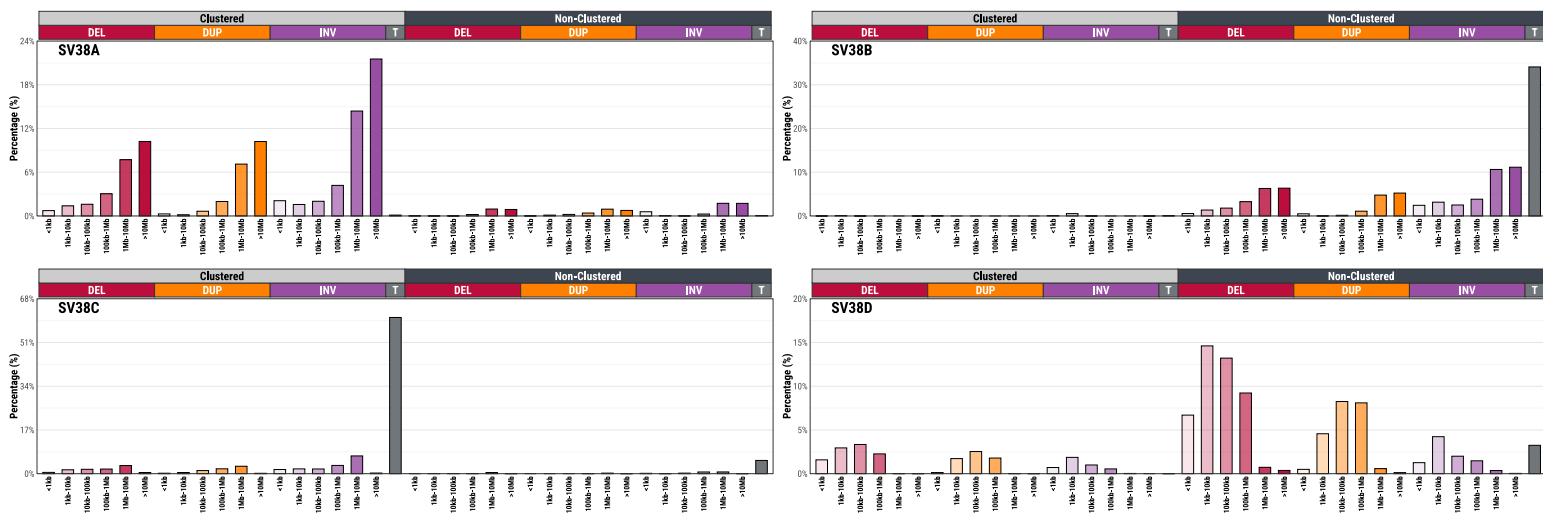

**b**

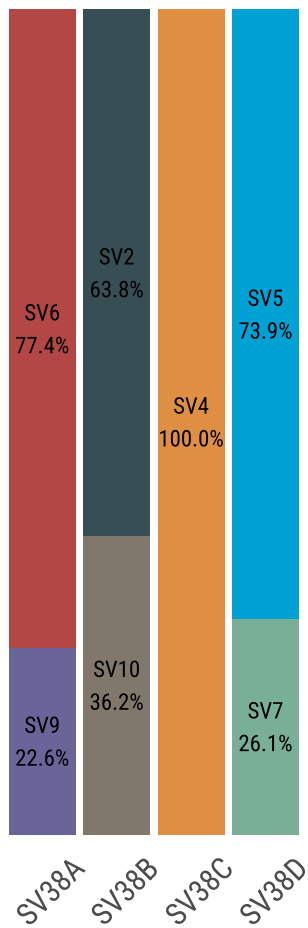

**Cosmic Signatures**

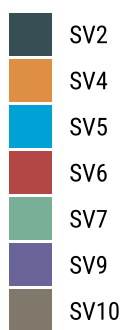

**c**

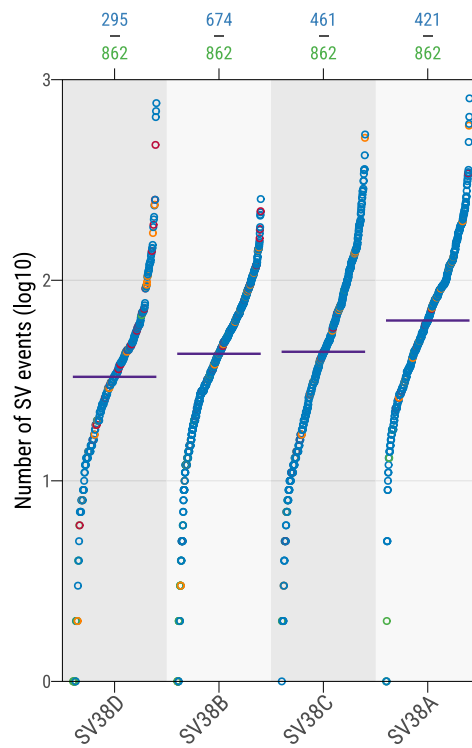

Supplementary Fig. 6

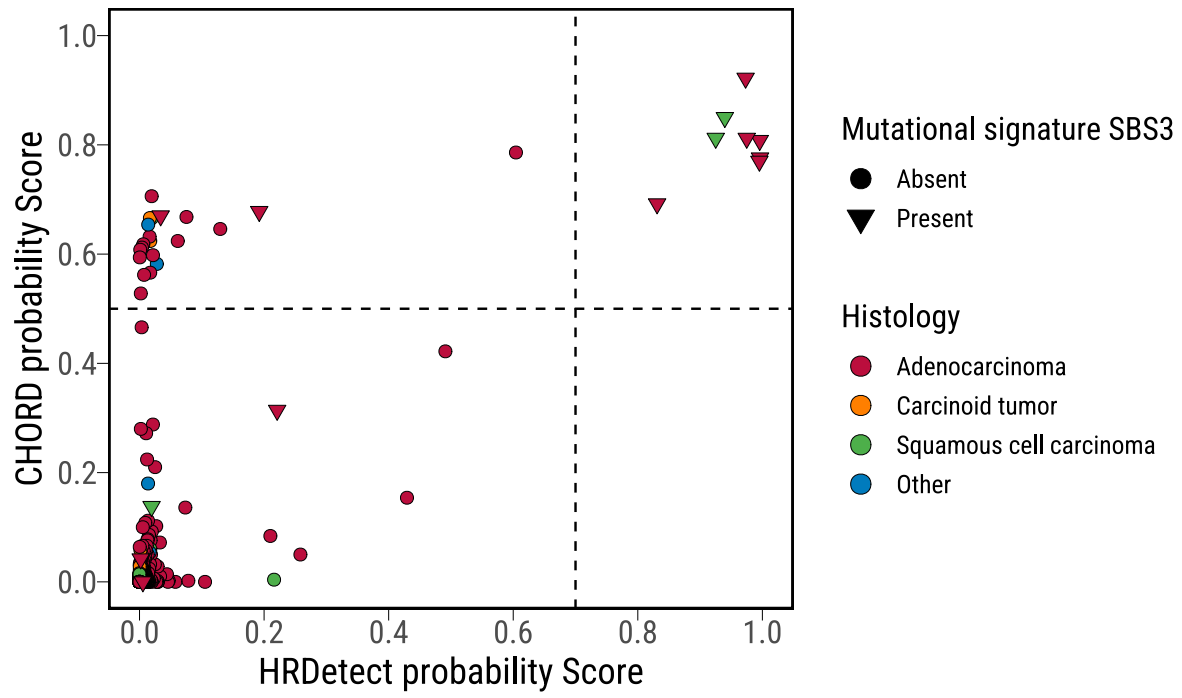

**Supplementary Fig. 7**

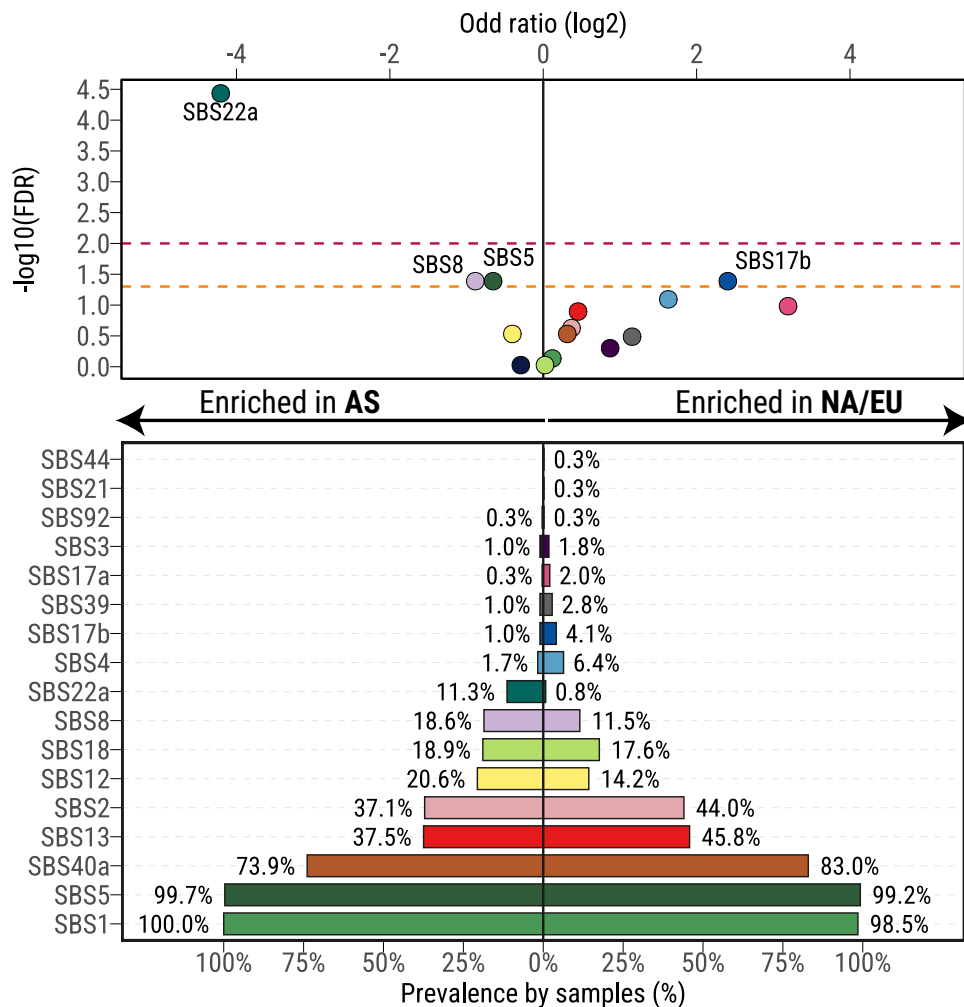

# Supplementary Fig. 8

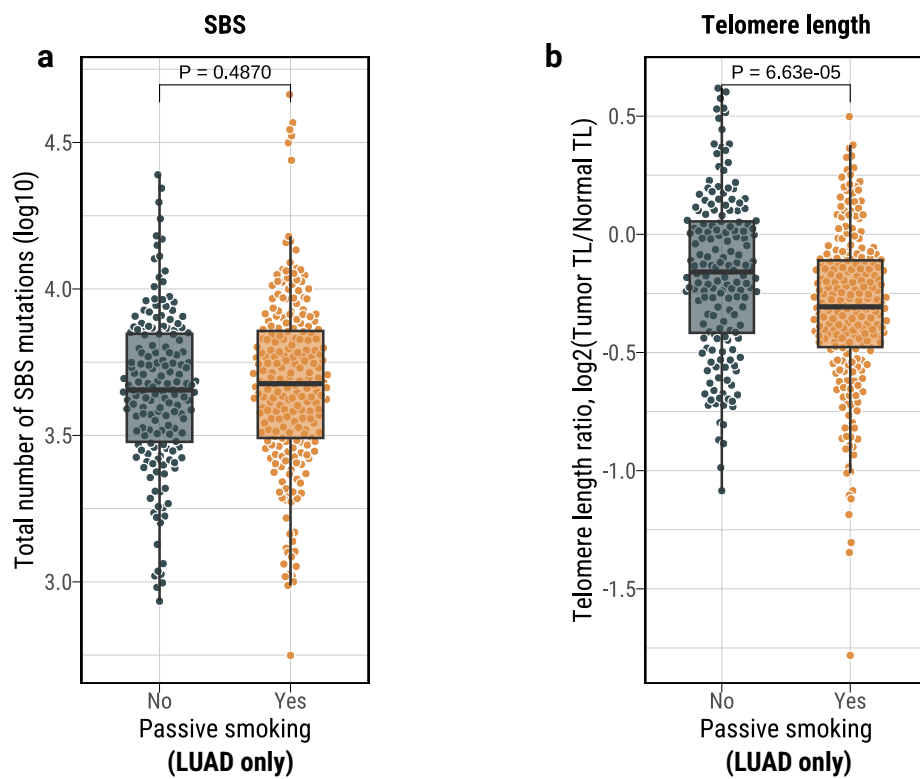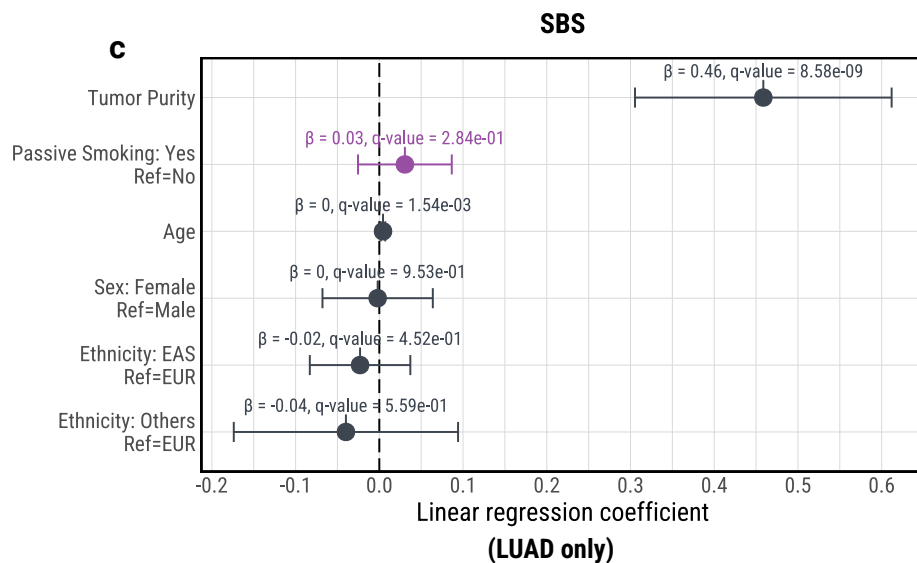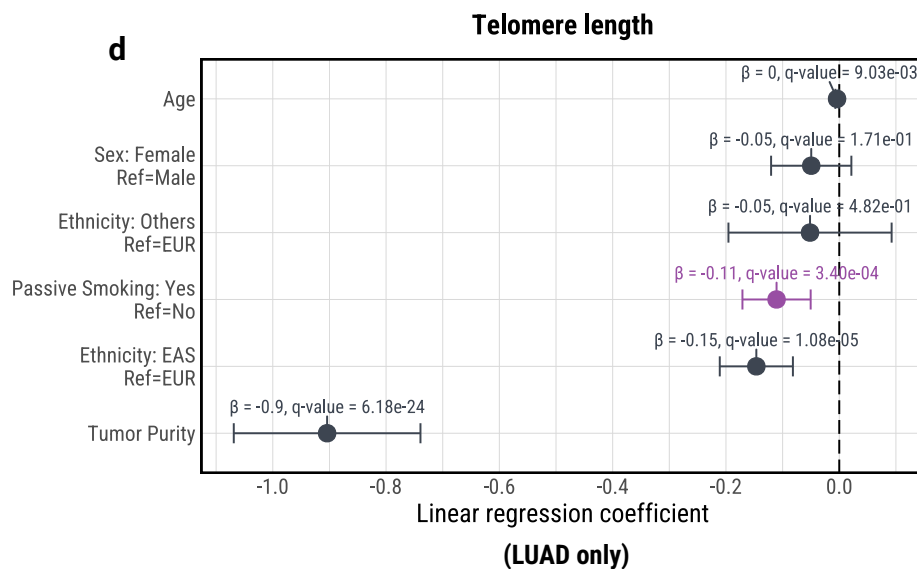



# Supplementary Fig. 9

**a**

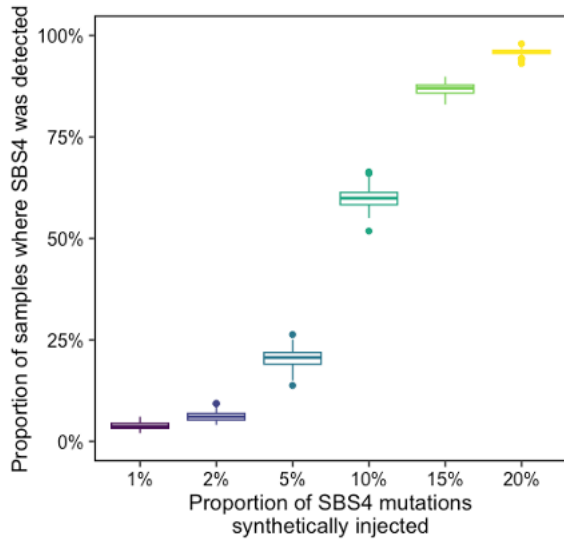

**b**

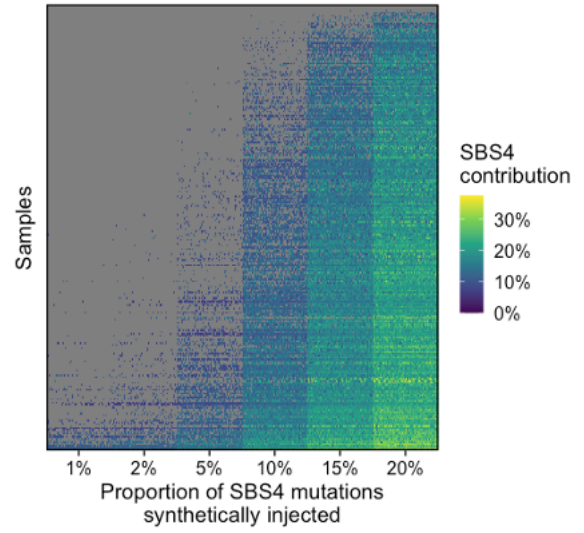

Supplementary Fig. 10

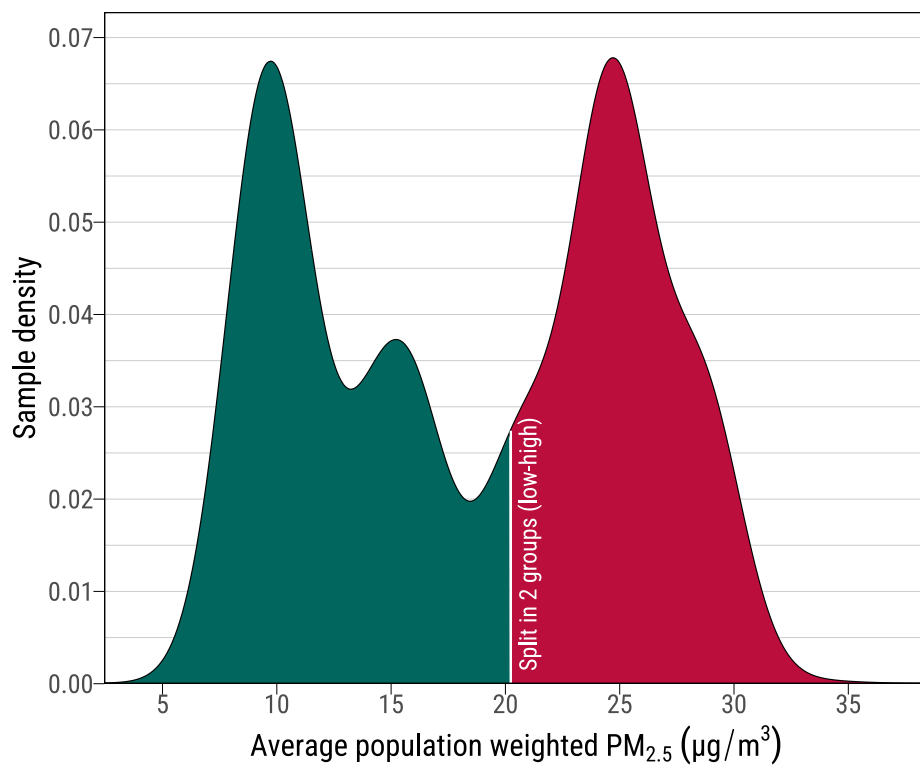

Supplement: media-2.pdf [file media-2.pdf]
